# Supplementary material for: Dearomative cyclization of pyridines/isoquinolines with cyclopropenones: access to indolizinones and benzo-fused indolizinones
Source: Royal Society of Chemistry journal article supplement (doi:10.1039/d3cc00492a), 2023-01-01
Supplement: d3cc00492a1.pdf [file d3cc00492a1.pdf]

Supporting Information for

**Dearomative Cyclization of Pyridines/Isoquinolines with Cyclopropenones: Access to Indolizinones and Benzo-Fused Indolizinones**

Xiang Liu,<sup>a</sup> Xiaotian Shi,<sup>a</sup> Jinlei Zhou,<sup>a</sup> Changfeng Huang,<sup>a</sup> Yu Lin,<sup>a</sup> Chen Zhang,<sup>a,b</sup> and Hua Cao<sup>\*a</sup>

<sup>a</sup>*School of Chemistry and Chemical Engineering and Guangdong Cosmetics Engineering & Technology Research Center, Guangdong Pharmaceutical University, Zhongshan 528458, P. R. of China*

<sup>b</sup>*School of Pharmaceutical Sciences, Sun Yat-Sen University, Guangzhou, 510006, China.*

E-mail: caohua@gdpu.edu.cn

**Table of Contents:**

---

|                                                      |      |
|------------------------------------------------------|------|
| 1. General considerations                            | S-2  |
| 2. Experimental procedures and characterization data | S-3  |
| 2.1 <i>Experimental procedures</i>                   | S-3  |
| 2.2 <i>Plausible mechanistic pathway</i>             | S-5  |
| 2.3 <i>DFT calculations</i>                          | S-6  |
| 2.4 <i>Characterization data</i>                     | S-16 |
| 3. NMR spectra for new compounds                     | S-26 |
| 4. X-ray crystallographic data                       | S-56 |
| 5. References                                        | S-59 |

---

## 1. General considerations

Unless otherwise noted, commercial reagents were purchased from Adamas, Alfa, Aladdin, TCI, *J&K* or Macklin and used without further purification. All reactions were carried out using oven-dried glassware and all reactions proceeded without special care. Column chromatography was performed on 200-300 mesh silica gel (Huanghai, China).

$^1\text{H}$ ,  $^{19}\text{F}$  and  $^{13}\text{C}\{^1\text{H}\}$  NMR spectra were recorded on an Bruker Ascend 400 MHz spectrometer at ambient temperature.  $^1\text{H}$  NMR spectra are referred to the TMS signal ( $\delta = 0$  ppm) and  $^{13}\text{C}$  NMR spectra are referred to the residual solvent signal ( $\delta = 77.16$  ppm). Data for  $^1\text{H}$  NMR are reported as follows: chemical shifts ( $\delta$  ppm), multiplicities (s = singlet, d = doublet, t = triplet, q = quartet, m = multiplet, br = broad), coupling constants (Hz), integration.

The data of HRMS was carried out on a waters G2-XS high-resolution mass spectrometer (HR-ESI-MS), or Thermo Fisher Scientific LTQ FTICR-MS, or Agilent 7250 GC/QTOF. Melting point were recorded using a SGW X-4 Melting Point Apparatus. X-ray diffraction data were collected on SuperNova, Dual, Cu at zero, AtlasS2.

## 2. Experimental procedures and characterization data

### 2.1 Experimental procedures

Synthesis of compounds **2** according to the following procedure<sup>1</sup>:

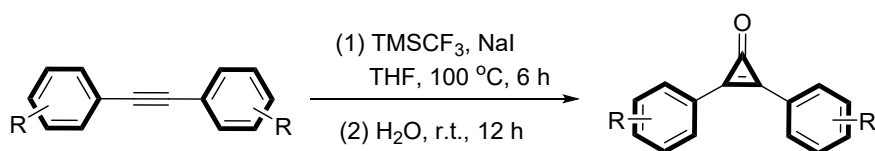

To an oven-dried Schlenk tube containing a stir bar was added NaI (1.65 g, 11 mmol, 2.2 equiv). A solution of diphenylacetylene (5.0 mmol, 1.0 equiv) in anhydrous THF (10.0 mL) was then added against positive N<sub>2</sub> flow. Trifluoromethyltrimethylsilane (1.42 g, 10.0 mmol, 2 equiv) was added, and the Schlenk tube was sealed. The reaction was stirred vigorously at 100 °C with a heating mantle for 6 h, then diluted with H<sub>2</sub>O (10.0 mL) and stirred at room temperature for 12 h. The mixtures were extracted with CH<sub>2</sub>Cl<sub>2</sub> (3 x 10 mL) and the combined organic layers were dried over MgSO<sub>4</sub> and filtered. The filtrate was concentrated in vacuo, and the residue was purified by flash column chromatography (petroleum ether: ethyl acetate = 5: 1) to give 2,3-diphenyl-2-cyclopropen-1-one as a yellow solid.

Compounds **2** were known compounds and synthesized according to the known procedures, and their NMR data were in agreement with those described in the literature.<sup>1</sup>

Synthesis of products **1** and **5** according to the following procedure<sup>2</sup>:

As exemplified for **1d**:

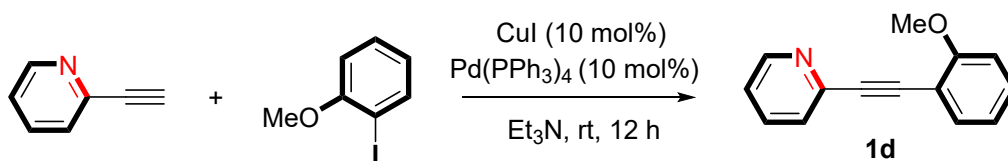

A pressure tube was charged with 2-ethynylpyridine (309.1 mg, 3.0 mmol, 1.0 equiv), 1-iodo-2-methoxybenzene (772.0 mg, 3.3 mmol, 1.1 equiv), CuI (57.0 mg, 0.3 mmol, 10 mol%), Pd(PPh<sub>3</sub>)<sub>4</sub> (346.3 mg, 0.3 mmol, 10 mol%) and Et<sub>3</sub>N (10.0 mL). The mixtures were stirred at room temperature for 12 h. The solution was concentrated in vacuo, and the residue was purified by flash column chromatography (petroleum ether: ethyl acetate = 20: 1) to give product **1d** in 78% yield (489.3 mg).

Compounds **1** and **5** were known compounds and synthesized according to the known procedures, and their NMR data were in agreement with those described in the literature.<sup>2</sup>

### Synthesis of products 3 according to the following procedure:

As exemplified for **3a**:

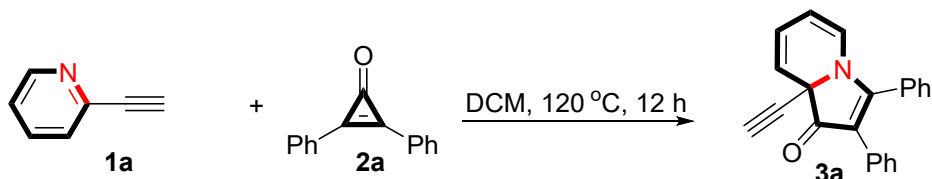

A pressure tube was charged with 2-ethynylpyridine (30.9 mg, 0.30 mmol, 1.0 equiv), 2,3-diphenyl-2-cyclopropen-1-one (61.8 mg, 0.30 mmol, 1.0 equiv) and DCM (3.0 mL). The mixtures were heated with a heating mantle at 120 °C for 12 h, then cooled to room temperature. The solution was concentrated in vacuo, and the residue was purified by flash column chromatography (petroleum ether: ethyl acetate = 7: 1) to give product **3a** in 80% yield (74.2 mg).

### Synthesis of products 6 according to the following procedure:

As exemplified for **6a**:

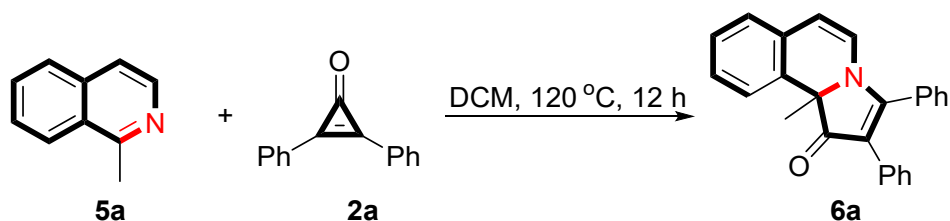

A pressure tube was charged with 1-methylisoquinoline (42.9 mg, 0.30 mmol, 1.0 equiv), 2,3-diphenyl-2-cyclopropen-1-one (61.8 mg, 0.30 mmol, 1.0 equiv) and DCM (3.0 mL). The mixtures were allowed to stir at 120 °C with a heating mantle for 12 h, then cooled to room temperature. The solution was concentrated in vacuo, and the residue was purified by flash column chromatography (petroleum ether: ethyl acetate = 1: 1) to give product **6a** in 78% yield (81.7 mg).

### Synthesis of products 8 according to the following procedure:

As exemplified for **8a**:

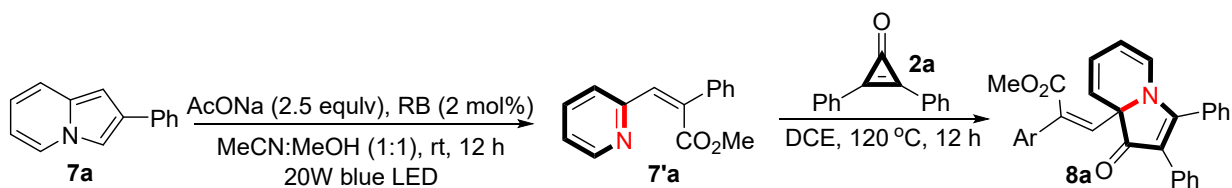

A pressure tube was charged with a stirring bar, 2-phenylindolizine (57.9 mg, 0.30 mmol, 1.0 equiv), AcONa (61.5 mg, 0.75 mmol, 2.5 equiv), RB (6.1 mg, 0.006 mmol, 2 mol%) and MeCN (2.0 ml) : MeOH (2.0 ml) were added. The reaction was stirred at room temperature under irradiation of blue LED for 12 h. The solution was concentrated in vacuo, and the residue was purified by flash column chromatography (petroleum ether: ethyl acetate = 7: 1) to give product **7'a** in 75% yield.<sup>3</sup>

A pressure tube with 3.0 mL DCM was charged with a stirring bar, methyl (*Z*)-2-phenyl-3-(pyridin-2-yl)acrylate (71.1 mg, 0.30 mmol, 1.0 equiv), 2,3-diphenyl-2-cyclopropen-1-one (67.9 mg, 0.33 mmol, 1.1 equiv) were added. The reaction was heated with a heating mantle at 120 °C for 12 h, then cooled to room temperature. The solution was concentrated in vacuo, and the residue was purified by flash column chromatography (petroleum ether: ethyl acetate = 7: 1) to give product **8a** in 70% yield (85.7 mg).

## 2.2 Plausible mechanistic pathway

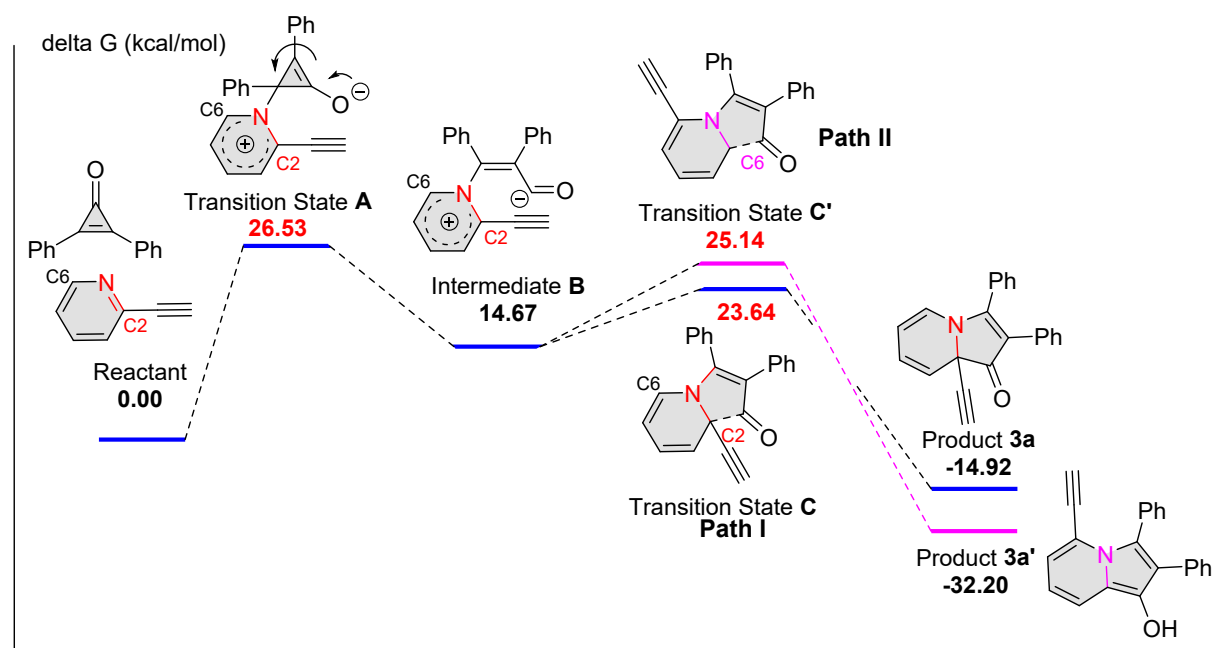

Figure S1 Plausible mechanistic pathway

## 2.3 DFT calculations

### Computational methods

All calculations were conducted with Gaussian 03, Revision E.01 package.<sup>4</sup> Each structure was optimized in gas phase at the M062X/6-31G\* level of theory. Analytical frequency calculations were performed at the same level of theory to ensure that all stationary points were either intermediates without any imaginary frequencies or transition states possessing only one

imaginary frequency. The Gibbs free energy was then refined based on single point calculations at the same functional, which was conducted in the presence of solvent through the SMD<sup>5</sup> method with dichloroethane. All listed energies are free energies at a concentration of 1 M. All three-dimensional structures of the species were generated using Molecular Operating Environment (MOE 2008.10) program.

**Reactant**

E = -976.554664 a.u.

|   |             |             |             |
|---|-------------|-------------|-------------|
| C | 0.04799900  | -0.01846900 | 1.37979700  |
| C | -1.25259000 | 0.34539500  | 1.23246000  |
| C | -0.35765600 | 1.25854000  | 1.86766100  |
| O | -0.10484400 | 2.32036600  | 2.39102200  |
| C | 1.10316600  | -0.95023400 | 1.02927100  |
| C | 2.39179800  | -0.73198000 | 1.52787400  |
| C | 3.43444100  | -1.57155200 | 1.15179300  |
| C | 3.19681000  | -2.62318400 | 0.26914800  |
| C | 1.91468300  | -2.84027600 | -0.23739600 |
| C | 0.86892300  | -2.00857500 | 0.14099900  |
| C | -2.54096200 | -0.00127200 | 0.65897400  |
| C | -3.43693700 | 1.01868000  | 0.32335500  |
| C | -4.64627900 | 0.70571000  | -0.28688900 |
| C | -4.97622800 | -0.62402700 | -0.54367900 |
| C | -4.09554200 | -1.64591100 | -0.18771400 |
| C | -2.87895800 | -1.33634500 | 0.40737900  |
| H | 2.56043700  | 0.10544400  | 2.19898900  |
| H | 4.43359900  | -1.40305300 | 1.54153600  |
| H | 4.01265500  | -3.27604200 | -0.02667600 |
| H | 1.73504900  | -3.65471400 | -0.93243900 |
| H | -0.12480000 | -2.14144000 | -0.27685700 |
| H | -3.16185400 | 2.04915000  | 0.52658300  |
| H | -5.33469300 | 1.49929800  | -0.55975400 |

|   |             |             |             |
|---|-------------|-------------|-------------|
| H | -5.92432400 | -0.86555900 | -1.01463200 |
| H | -4.35900500 | -2.68220400 | -0.37595900 |
| H | -2.18714100 | -2.12406200 | 0.69287000  |
| C | 3.34368300  | 0.91487600  | -1.39178100 |
| C | 2.19502500  | 0.36312700  | -1.94334600 |
| C | 0.96033800  | 0.92443100  | -1.60001700 |
| N | 0.83100600  | 1.97326600  | -0.77575400 |
| C | 1.94254900  | 2.48370500  | -0.24882900 |
| C | 3.21931000  | 1.99485800  | -0.52382200 |
| C | -0.26740900 | 0.33656500  | -2.07697600 |
| C | -1.30346200 | -0.16873600 | -2.43238500 |
| H | 4.31882000  | 0.49746100  | -1.62420200 |
| H | 2.23225300  | -0.49501100 | -2.60515700 |
| H | 1.79580200  | 3.30823600  | 0.44435200  |
| H | 4.08847400  | 2.44818000  | -0.05924100 |
| H | -2.23976200 | -0.59341200 | -2.72258200 |

**Transition State A (Transition State A')**

E = -976.512380 a.u.

|   |             |             |             |
|---|-------------|-------------|-------------|
| C | 2.48589700  | -3.47477100 | -0.72358400 |
| C | 2.60469700  | -2.99538800 | 0.57605400  |
| C | 1.93422400  | -1.83443100 | 0.92748400  |
| N | 1.17565100  | -1.16885200 | 0.03911700  |
| C | 1.03696600  | -1.62133400 | -1.22732600 |
| C | 1.69287700  | -2.78449300 | -1.63055700 |
| C | -0.99546700 | -0.03576100 | 0.95480900  |
| C | 0.42278400  | 0.10385800  | 0.61558500  |
| C | -0.14199700 | -0.21774200 | 1.98017100  |
| O | 0.26213100  | -0.48931700 | 3.11409500  |
| C | 0.21028400  | -0.90908700 | -2.14885000 |
| C | -0.46771600 | -0.40352300 | -3.00657300 |

|   |             |             |             |
|---|-------------|-------------|-------------|
| C | -2.36260900 | 0.06194700  | 0.48732100  |
| C | -3.39197200 | -0.43344600 | 1.30553700  |
| C | -4.72135900 | -0.33759500 | 0.91585700  |
| C | -5.06054400 | 0.24943600  | -0.30250700 |
| C | -4.04987800 | 0.74913800  | -1.11993000 |
| C | -2.71864600 | 0.66099900  | -0.72893500 |
| C | 1.23280200  | 1.31184800  | 0.25008100  |
| C | 2.37011200  | 1.62207900  | 1.00553600  |
| C | 3.13059700  | 2.75046300  | 0.71540100  |
| C | 2.76035700  | 3.58937000  | -0.33351000 |
| C | 1.62202000  | 3.29951600  | -1.08085700 |
| C | 0.86503400  | 2.16827800  | -0.78998600 |
| H | 2.99977400  | -4.38025000 | -1.02898300 |
| H | 3.20167100  | -3.50851100 | 1.32027800  |
| H | 1.93164000  | -1.42105600 | 1.93319600  |
| H | 1.56476700  | -3.12337300 | -2.65153600 |
| H | -1.08872100 | 0.06031000  | -3.74205600 |
| H | -3.12639900 | -0.89189200 | 2.25395700  |
| H | -5.49937100 | -0.72590000 | 1.56699900  |
| H | -6.09995100 | 0.32272700  | -0.60708100 |
| H | -4.30140100 | 1.22368500  | -2.06485800 |
| H | -1.94079800 | 1.07484800  | -1.36126000 |
| H | 2.63145200  | 0.98869400  | 1.84990200  |
| H | 4.00446000  | 2.98387900  | 1.31633100  |
| H | 3.35038400  | 4.47230600  | -0.55997600 |
| H | 1.32051900  | 3.95783200  | -1.89023300 |
| H | -0.02542200 | 1.94704200  | -1.36859400 |

**Intermediate B (Intermediate B')**

E = -976.531283 a.u.

|   |            |             |            |
|---|------------|-------------|------------|
| C | 4.21907900 | -1.75707600 | 0.41386400 |
|---|------------|-------------|------------|



|   |             |             |             |
|---|-------------|-------------|-------------|
| C | 3.01419000  | -2.37622300 | 0.68380300  |
| C | 1.79299200  | -1.71780100 | 0.53630800  |
| N | 1.73881500  | -0.41899200 | 0.01723000  |
| C | 2.95893700  | 0.19715800  | -0.22597200 |
| C | 4.15889400  | -0.42800100 | -0.02922500 |
| C | -0.57245300 | -0.54726300 | -0.80555900 |
| C | 0.55640500  | 0.23140100  | -0.26877000 |
| C | -0.27479700 | -1.13815200 | -1.96054200 |
| O | 0.06818900  | -1.67260900 | -2.93735400 |
| C | 0.59829700  | -2.32130900 | 1.00798700  |
| C | -0.38771200 | -2.85058300 | 1.46206100  |
| C | -1.92707200 | -0.62187400 | -0.22336100 |
| C | -2.16761900 | -0.07459700 | 1.04102900  |
| C | -3.43458800 | -0.14892400 | 1.61099600  |
| C | -4.47960800 | -0.77325800 | 0.93516800  |
| C | -4.24627200 | -1.31909700 | -0.32600300 |
| C | -2.98549400 | -1.23760900 | -0.90325200 |
| C | 0.45144700  | 1.68369500  | -0.16123800 |
| C | 1.18263200  | 2.42751000  | 0.78969000  |
| C | 0.99185000  | 3.79328900  | 0.93525100  |
| C | 0.05797600  | 4.46782200  | 0.14909800  |
| C | -0.68795600 | 3.74628300  | -0.77861600 |
| C | -0.49810900 | 2.37829200  | -0.93272300 |
| H | 5.16313300  | -2.26959300 | 0.54776800  |
| H | 2.97084800  | -3.38945500 | 1.06775600  |
| H | 2.88403000  | 1.19048800  | -0.64390500 |
| H | 5.05908300  | 0.12747500  | -0.26891300 |
| H | -1.28169300 | -3.28566500 | 1.85125300  |
| H | -1.35124700 | 0.40213400  | 1.57557100  |
| H | -3.60297400 | 0.28464900  | 2.59245100  |

|   |             |             |             |
|---|-------------|-------------|-------------|
| H | -5.46657200 | -0.83211100 | 1.38309300  |
| H | -5.05173700 | -1.80809300 | -0.86592300 |
| H | -2.82012400 | -1.66002000 | -1.89279700 |
| H | 1.89547000  | 1.92035000  | 1.43534600  |
| H | 1.56806400  | 4.33447000  | 1.68028400  |
| H | -0.09091400 | 5.53638200  | 0.26622800  |
| H | -1.42688700 | 4.25197100  | -1.39333800 |
| H | -1.09181200 | 1.82873600  | -1.65661000 |

### Transition State C

E = -976.516999 a.u.

|   |             |             |             |
|---|-------------|-------------|-------------|
| C | 4.42163700  | 0.19245700  | -1.08791000 |
| C | 3.87983400  | -0.86244800 | -0.41194000 |
| C | 2.62251900  | -0.76729300 | 0.23648300  |
| N | 1.82436400  | 0.38830500  | -0.01036700 |
| C | 2.50210900  | 1.54525800  | -0.45398200 |
| C | 3.73150500  | 1.44097800  | -1.00751800 |
| C | -0.12577000 | -1.01356100 | -0.06028200 |
| C | 0.48962500  | 0.27906400  | 0.02393400  |
| C | 0.57536500  | -2.16000000 | -0.28273500 |
| O | 0.83033300  | -3.28479400 | -0.43468300 |
| C | 2.36486200  | -1.48309000 | 1.43599600  |
| C | 2.10920800  | -2.11412700 | 2.43744600  |
| C | -1.60446600 | -1.21522700 | -0.10065700 |
| C | -2.41161800 | -0.68089200 | 0.91155900  |
| C | -3.78708600 | -0.87537600 | 0.89017500  |
| C | -4.37794000 | -1.62372000 | -0.12668300 |
| C | -3.58096400 | -2.17086500 | -1.12699700 |
| C | -2.20476100 | -1.96083100 | -1.12003400 |
| C | -0.33522100 | 1.50760500  | 0.04941600  |
| C | -0.17262100 | 2.44589100  | 1.07593700  |

|   |             |             |             |
|---|-------------|-------------|-------------|
| C | -0.95359000 | 3.59652800  | 1.10819200  |
| C | -1.90758500 | 3.81976600  | 0.11747800  |
| C | -2.07532200 | 2.88997800  | -0.90621200 |
| C | -1.29560800 | 1.73949800  | -0.94122800 |
| H | 5.37838400  | 0.11783400  | -1.58895100 |
| H | 4.41579400  | -1.79911700 | -0.29077300 |
| H | 1.94604600  | 2.46940400  | -0.39779600 |
| H | 4.19071400  | 2.34973600  | -1.38250700 |
| H | 1.91691900  | -2.65008200 | 3.33903100  |
| H | -1.95157400 | -0.10836000 | 1.71170500  |
| H | -4.39978300 | -0.44883300 | 1.67867600  |
| H | -5.45214800 | -1.77925500 | -0.13683200 |
| H | -4.03026000 | -2.75447900 | -1.92483000 |
| H | -1.58854300 | -2.37525900 | -1.91379100 |
| H | 0.56719100  | 2.26148300  | 1.85125900  |
| H | -0.82210000 | 4.31554400  | 1.91077900  |
| H | -2.52004900 | 4.71563100  | 0.14435800  |
| H | -2.81717600 | 3.05961500  | -1.68010200 |
| H | -1.43130000 | 1.00880200  | -1.73280500 |

**Product 3a**

E = -976.578441 a.u.

|   |             |             |             |
|---|-------------|-------------|-------------|
| C | 3.99252000  | -0.09430500 | -1.37023900 |
| C | 3.27960800  | -1.13721600 | -0.93041100 |
| C | 2.21902400  | -0.91482200 | 0.11837000  |
| N | 1.68213000  | 0.44914300  | 0.06115600  |
| C | 2.50412400  | 1.50658200  | -0.32261900 |
| C | 3.66877000  | 1.26485200  | -0.94952800 |
| C | -0.19789100 | -0.86915900 | -0.02074100 |
| C | 0.30079000  | 0.40650000  | 0.01754600  |
| C | 0.94419700  | -1.78382300 | -0.09580500 |

|   |             |             |             |
|---|-------------|-------------|-------------|
| O | 0.98416600  | -2.97907100 | -0.27198300 |
| C | 2.74226100  | -1.21179800 | 1.46484200  |
| C | 3.18016200  | -1.48296000 | 2.55298700  |
| C | -1.60103900 | -1.30886400 | -0.00576500 |
| C | -2.56794500 | -0.63902800 | 0.75771500  |
| C | -3.88736800 | -1.07421700 | 0.76836300  |
| C | -4.26429200 | -2.19297700 | 0.02798000  |
| C | -3.30786100 | -2.87529100 | -0.71838700 |
| C | -1.98627800 | -2.44074100 | -0.73689700 |
| C | -0.46485500 | 1.66995900  | -0.00432700 |
| C | -0.25088200 | 2.64501400  | 0.97489700  |
| C | -0.99837700 | 3.81860400  | 0.96404800  |
| C | -1.95458200 | 4.02676200  | -0.02742100 |
| C | -2.16691300 | 3.05777900  | -1.00610300 |
| C | -1.42902900 | 1.87979100  | -0.99403700 |
| H | 4.79036600  | -0.24047400 | -2.09209100 |
| H | 3.43463700  | -2.16350400 | -1.24675100 |
| H | 2.13582500  | 2.50148100  | -0.10224700 |
| H | 4.31966600  | 2.09100300  | -1.20665000 |
| H | 3.56685000  | -1.72072800 | 3.51871000  |
| H | -2.27761900 | 0.22086800  | 1.35422600  |
| H | -4.62222200 | -0.54341800 | 1.36631300  |
| H | -5.29483800 | -2.53446000 | 0.04074200  |
| H | -3.58944500 | -3.75351600 | -1.29153600 |
| H | -1.24051000 | -2.98181600 | -1.30824500 |
| H | 0.48852600  | 2.46925000  | 1.75227900  |
| H | -0.83668800 | 4.56866800  | 1.73171900  |
| H | -2.53669400 | 4.94294800  | -0.03553200 |
| H | -2.91293800 | 3.21734800  | -1.77792800 |
| H | -1.59799700 | 1.11106900  | -1.74205300 |

### Transition State C'

E = -976.514602 a.u.

|   |           |           |           |
|---|-----------|-----------|-----------|
| C | -3.904714 | -2.177852 | -0.877354 |
| C | -3.973711 | -0.912860 | -0.327297 |
| C | -2.830292 | -0.187570 | 0.042704  |
| N | -1.542234 | -0.698624 | -0.251224 |
| C | -1.488960 | -2.010452 | -0.736839 |
| C | -2.614797 | -2.714469 | -1.065842 |
| C | 0.722420  | -0.964212 | 0.430177  |
| C | -0.354691 | -0.050441 | 0.042931  |
| C | 0.235594  | -2.044041 | 1.049227  |
| O | -0.285079 | -3.008285 | 1.462885  |
| C | -2.974662 | 0.987284  | 0.810953  |
| C | -3.195347 | 1.973202  | 1.481107  |
| C | 2.162631  | -0.870469 | 0.095092  |
| C | 2.583357  | -0.178711 | -1.052936 |
| C | 3.935877  | -0.115994 | -1.382981 |
| C | 4.891981  | -0.747926 | -0.584815 |
| C | 4.482368  | -1.437488 | 0.558075  |
| C | 3.133167  | -1.487386 | 0.902792  |
| C | -0.182646 | 1.395868  | 0.022416  |
| C | -0.831957 | 2.212963  | -0.931796 |
| C | -0.562873 | 3.574816  | -1.011694 |
| C | 0.359944  | 4.170628  | -0.147062 |
| C | 1.012404  | 3.377854  | 0.800181  |
| C | 0.748929  | 2.014035  | 0.884928  |
| H | -4.797372 | -2.737713 | -1.130083 |
| H | -4.928118 | -0.447865 | -0.103389 |
| H | -0.518289 | -2.368414 | -1.029256 |
| H | -2.477393 | -3.700912 | -1.498192 |

|   |           |           |           |
|---|-----------|-----------|-----------|
| H | -3.346094 | 2.839589  | 2.083690  |
| H | 1.845997  | 0.309295  | -1.682060 |
| H | 4.242694  | 0.427199  | -2.273048 |
| H | 5.945266  | -0.696932 | -0.846418 |
| H | 5.216248  | -1.925977 | 1.193828  |
| H | 2.826362  | -1.998086 | 1.812840  |
| H | -1.541839 | 1.768644  | -1.623645 |
| H | -1.074968 | 4.175210  | -1.759602 |
| H | 0.567904  | 5.235002  | -0.212579 |
| H | 1.731186  | 3.824930  | 1.482434  |
| H | 1.260557  | 1.412001  | 1.629169  |

**Product 3a'**

E = -976.584595 a.u.

|   |           |           |           |
|---|-----------|-----------|-----------|
| C | -3.256246 | -2.538664 | 1.006725  |
| C | -3.731995 | -1.285745 | 0.450680  |
| C | -2.869782 | -0.426332 | -0.169763 |
| N | -1.524969 | -0.839928 | -0.289962 |
| C | -1.259956 | -2.273370 | -0.379017 |
| C | -2.055296 | -3.030177 | 0.643229  |
| C | 0.774030  | -0.957107 | -0.195483 |
| C | -0.341867 | -0.134668 | -0.175322 |
| C | 0.317150  | -2.342228 | -0.261300 |
| O | 0.934669  | -3.393682 | -0.240669 |
| C | -3.300498 | 0.805543  | -0.739164 |
| C | -3.724749 | 1.825284  | -1.233799 |
| C | 2.195539  | -0.594059 | -0.030204 |
| C | 3.177002  | -1.340692 | -0.708900 |
| C | 4.530011  | -1.037532 | -0.568946 |
| C | 4.937126  | 0.013520  | 0.254343  |
| C | 3.975594  | 0.752377  | 0.946084  |

|   |           |           |           |
|---|-----------|-----------|-----------|
| C | 2.621941  | 0.449591  | 0.811324  |
| C | -0.348867 | 1.341052  | -0.032720 |
| C | 0.255401  | 2.143374  | -1.010422 |
| C | 0.272404  | 3.529563  | -0.867096 |
| C | -0.298769 | 4.125623  | 0.259502  |
| C | -0.890937 | 3.330579  | 1.242689  |
| C | -0.921967 | 1.944681  | 1.096440  |
| H | -3.891466 | -3.073893 | 1.707396  |
| H | -4.779954 | -1.016674 | 0.515914  |
| H | -1.496665 | -2.631920 | -1.397247 |
| H | -1.647718 | -3.964281 | 1.018489  |
| H | -4.073939 | 2.735123  | -1.666648 |
| H | 2.871543  | -2.169877 | -1.336882 |
| H | 5.268675  | -1.627729 | -1.105303 |
| H | 5.992604  | 0.248859  | 0.363200  |
| H | 4.279342  | 1.563327  | 1.603325  |
| H | 1.891059  | 1.020200  | 1.373956  |
| H | 0.708373  | 1.676026  | -1.879324 |
| H | 0.737705  | 4.144121  | -1.632764 |
| H | -0.278027 | 5.206163  | 0.373087  |
| H | -1.331410 | 3.789060  | 2.123732  |
| H | -1.384306 | 1.326765  | 1.860886  |

## 2.4 Characterization data

### 8A-ethynyl-2,3-diphenylindolizin-1(8aH)-one (3a)

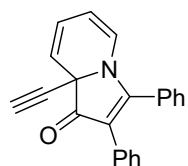

Flash column chromatography on silica gel (eluent: PE/EA = 7/1, v/v) to afford **3a**.

Yellow solid (74.2 mg, 80%), mp 188.2-189.0 °C. <sup>1</sup>H NMR (400 MHz, CDCl<sub>3</sub>) δ 7.50 – 7.43 (m, 3H), 7.37 (d, *J* = 6.7 Hz, 2H), 7.19 – 7.09 (m, 5H), 6.38 (d, *J* = 7.3 Hz, 1H), 6.13 – 6.02 (m, 2H), 5.45 (ddd, *J* = 7.0, 5.4, 1.2 Hz, 1H), 2.62 (s, 1H). <sup>13</sup>C NMR (100 MHz, CDCl<sub>3</sub>) δ 194.4, 169.2, 130.7, 130.1, 129.1, 128.9, 128.8, 128.5, 127.9, 126.3, 124.1, 123.6, 119.7, 110.4, 108.9, 79.8, 73.7, 62.3. HRMS (GC/QTOF) *m/z*: [*M*]<sup>+</sup> calcd for C<sub>22</sub>H<sub>15</sub>NO, 309.1154; found 309.1146.

### 2,3-Diphenyl-8a-((trimethylsilyl)ethynyl)indolizin-1(8aH)-one (3b)

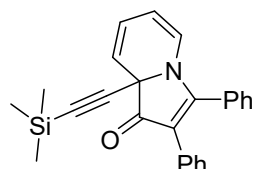

Flash column chromatography on silica gel (eluent: PE/EA = 10/1, v/v) to afford **3b**.

Yellow solid (100.8 mg, 78%), mp 190.5-191.2 °C. <sup>1</sup>H NMR (400 MHz, CDCl<sub>3</sub>) δ 7.31 (dd, *J* = 9.1, 7.0 Hz, 3H), 7.22 (d, *J* = 6.5 Hz, 2H), 7.02 – 6.94 (m, 5H), 6.18 (d, *J* = 7.2 Hz, 1H), 5.91 – 5.84 (m, 2H), 5.26 (ddd, *J* = 6.9, 4.7, 2.0 Hz, 1H), -0.00 (s, 9H). <sup>13</sup>C NMR (100 MHz, CDCl<sub>3</sub>) δ 194.8, 169.3, 130.7, 130.6, 129.2, 129.0, 128.9, 128.8, 128.0, 126.3, 123.8, 123.6, 120.5, 110.3, 109.1, 100.2, 90.7, 63.4. HRMS (GC/QTOF) *m/z*: [*M*]<sup>+</sup> calcd for C<sub>25</sub>H<sub>23</sub>NOSi, 381.1549; found 381.1557.

### 2,3-Diphenyl-8a-(phenylethynyl)indolizin-1(8aH)-one (3c)

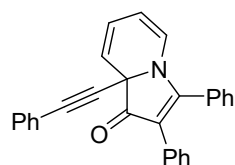

Flash column chromatography on silica gel (eluent: PE/EA = 10/1, v/v) to afford **3c**.

Yellow solid (88.1 mg, 77%), mp 198.3-198.9 °C. <sup>1</sup>H NMR (400 MHz, CDCl<sub>3</sub>) δ 7.48 – 7.39 (m, 7H), 7.27 (d, *J* = 6.7 Hz, 3H), 7.17 (d, *J* = 4.3 Hz, 4H), 7.13 – 7.09 (m, 1H), 6.40 (d, *J* = 7.2 Hz, 1H), 6.15 – 6.07 (m, 2H), 5.46 (ddd, *J* = 7.0, 4.3, 2.3 Hz, 1H). <sup>13</sup>C NMR (100 MHz, CDCl<sub>3</sub>) δ 194.9, 169.2, 132.1, 130.7, 130.4, 129.1, 128.9, 128.8, 128.7, 128.6, 128.1, 127.9, 126.2, 123.8, 123.7, 122.1, 120.1, 110.3, 109.1, 85.5, 85.1, 63.1. HRMS (GC/QTOF) *m/z*: [*M*]<sup>+</sup> calcd for C<sub>28</sub>H<sub>19</sub>NO, 385.1467; found 385.1457.

### 8A-((2-methoxyphenyl)ethynyl)-2,3-diphenylindolizin-1(8aH)-one (3d)

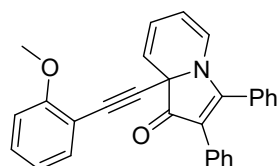

Flash column chromatography on silica gel (eluent: PE/EA = 8/1, v/v) to afford **3d**.

Yellow solid (105.0 mg, 75%), mp 205.8-206.2 °C. <sup>1</sup>H NMR (400 MHz, CDCl<sub>3</sub>) δ 7.49 – 7.38 (m, 6H), 7.27 – 7.25 (m, 1H), 7.16 (d, *J* = 4.4 Hz, 4H), 7.12 – 7.09 (m,



1H), 6.87 – 6.79 (m, 2H), 6.39 (d,  $J = 7.2$  Hz, 1H), 6.18 – 6.06 (m, 2H), 5.46 (ddd,  $J = 6.8, 5.3, 1.3$  Hz, 1H), 3.82 (s, 3H).  $^{13}\text{C}$  NMR (100 MHz,  $\text{CDCl}_3$ )  $\delta$  194.9, 169.0, 160.4, 134.0, 130.7, 130.6, 130.1, 129.1, 129.0, 128.9, 128.8, 128.7, 127.9, 126.1, 123.7, 120.3, 120.2, 111.5, 110.9, 110.2, 109.0, 88.9, 82.1, 63.3, 55.9. HRMS (GC/QTOF)  $m/z$ :  $[\text{M}]^+$  calcd for  $\text{C}_{29}\text{H}_{21}\text{NO}_2$ , 415.1572; found 415.1572.

### 2,3-Diphenyl-8a-(*m*-tolylethynyl)indolizin-1(8a*H*)-one (3e)

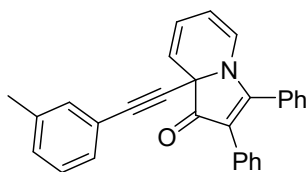

Flash column chromatography on silica gel (eluent: PE/EA = 10/1, v/v) to afford **3e**. Yellow solid (88.3 mg, 77%), mp 208.9-209.8 °C.  $^1\text{H}$  NMR (400 MHz,  $\text{CDCl}_3$ )  $\delta$  7.50 – 7.40 (m, 5H), 7.29 – 7.25 (m, 3H), 7.19 – 7.11 (m, 7H), 6.40 (d,  $J = 7.2$  Hz, 1H), 6.11 (d,  $J = 3.5$  Hz, 2H), 5.46 (ddd,  $J = 7.0, 4.1, 2.6$  Hz, 1H), 2.30 (s, 3H).  $^{13}\text{C}$  NMR (100 MHz,  $\text{CDCl}_3$ )  $\delta$  194.9, 169.1, 137.8, 132.7, 130.6, 130.4, 129.5, 129.2, 129.1, 128.9, 128.8, 128.7, 128.0, 127.9, 126.2, 123.7, 121.9, 120.2, 110.2, 109.0, 85.6, 84.7, 63.1, 21.1. HRMS (GC/QTOF)  $m/z$ :  $[\text{M}]^+$  calcd for  $\text{C}_{29}\text{H}_{21}\text{NO}$ , 399.1623; found 399.1617.

### 8A-((3-chlorophenyl)ethynyl)-2,3-diphenylindolizin-1(8a*H*)-one (3f)

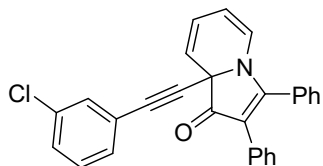

Flash column chromatography on silica gel (eluent: PE/EA = 10/1, v/v) to afford **3f**. Yellow solid (106.4 mg, 70%), mp 190.5-191.2 °C.  $^1\text{H}$  NMR (400 MHz,  $\text{CDCl}_3$ )  $\delta$  7.51 – 7.39 (m, 6H), 7.33 (d,  $J = 7.6$  Hz, 1H), 7.29 – 7.26 (m, 1H), 7.22 (d,  $J = 7.8$  Hz, 1H), 7.19 – 7.10 (m, 5H), 6.41 (d,  $J = 7.2$  Hz, 1H), 6.11 (d,  $J = 5.0$  Hz, 2H), 5.46 (ddd,  $J = 6.9, 4.7, 1.7$  Hz, 1H).  $^{13}\text{C}$  NMR (100 MHz,  $\text{CDCl}_3$ )  $\delta$  194.6, 169.3, 134.0, 131.9, 130.7, 130.3, 130.2, 129.4, 129.1, 128.9, 128.8, 128.6, 127.9, 126.3, 124.0, 123.8, 123.7, 119.8, 110.4, 109.1, 86.3, 84.0, 62.9. HRMS (GC/QTOF)  $m/z$ :  $[\text{M}]^+$  calcd for  $\text{C}_{28}\text{H}_{18}\text{ClNO}$ , 419.1077; found 419.1087.

### 8A-((4-fluorophenyl)ethynyl)-2,3-diphenylindolizin-1(8a*H*)-one (3g)

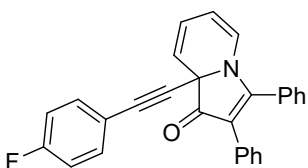

Flash column chromatography on silica gel (eluent: PE/EA = 10/1, v/v) to afford **3g**. Yellow solid (93.8 mg, 67%), mp 158.6-159.3 °C.  $^1\text{H}$  NMR (400 MHz,  $\text{CDCl}_3$ )  $\delta$  7.50 – 7.44 (m, 3H), 7.42 – 7.36 (m, 4H), 7.24 (d,  $J = 1.9$  Hz, 1H), 7.18 – 7.12 (m, 5H), 6.41 (d,  $J = 7.2$  Hz, 1H), 6.15 – 6.04 (m, 2H), 5.46 (ddd,  $J = 7.0, 4.3, 2.3$  Hz, 1H).  $^{13}\text{C}$  NMR (400 MHz,  $\text{CDCl}_3$ )  $\delta$  194.7, 169.3, 134.7, 133.3, 130.7, 130.3, 129.1, 128.9, 128.8, 128.6, 128.5,

127.9, 126.3, 123.8 (d,  $J = 16.2$  Hz), 120.6, 119.9, 110.3, 109.1, 86.0, 84.3, 63.0. HRMS (GC/QTOF)  $m/z$ :  $[M]^+$  calcd for  $C_{28}H_{18}FNO$ , 403.1372; found 403.1369.

### 2,3-Diphenyl-8a-(*p*-tolylethynyl)indolizin-1(8a*H*)-one (3h)

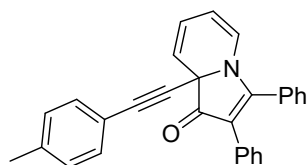

Flash column chromatography on silica gel (eluent: PE/EA = 10/1, v/v) to afford **3h**. Yellow solid (100.2 mg, 73%), mp 212.6-213.3 °C.  $^1H$  NMR (400 MHz,  $CDCl_3$ )  $\delta$  7.51 – 7.39 (m, 6H), 7.35 (d,  $J = 7.8$  Hz, 2H), 7.19 – 7.16 (m, 4H), 7.08 (d,  $J = 8.0$  Hz, 2H), 6.41 (d,  $J = 7.2$  Hz, 1H), 6.11 (d,  $J = 4.7$  Hz, 2H), 5.46 (ddd,  $J = 7.0, 4.6, 2.0$  Hz, 1H), 2.33 (s, 3H).  $^{13}C$  NMR (400 MHz,  $CDCl_3$ )  $\delta$  195.0, 169.2, 138.8, 132.0, 130.6, 130.5, 129.1, 128.9, 128.8, 128.7, 127.9, 126.2, 123.8, 123.7, 120.3, 119.0, 110.2, 109.1, 85.7, 84.4, 63.1, 21.5. HRMS (GC/QTOF)  $m/z$ :  $[M]^+$  calcd for  $C_{29}H_{21}NO$ , 399.1632; found 399.1629.

### 8-Methyl-2,3-diphenyl-8a-(phenylethynyl)indolizin-1(8a*H*)-one (3i)

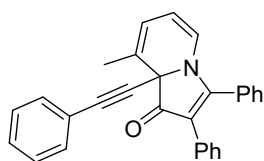

Flash column chromatography on silica gel (eluent: PE/EA = 10/1, v/v) to afford **3i**. Yellow solid (86.0 mg, 72%), mp 210.2-211.3 °C.  $^1H$  NMR (400 MHz,  $CDCl_3$ )  $\delta$  7.50 – 7.43 (m, 5H), 7.42 – 7.38 (m, 2H), 7.32 – 7.27 (m, 3H), 7.19 – 7.07 (m, 5H), 6.29 (d,  $J = 7.2$  Hz, 1H), 5.76 (dd,  $J = 5.8, 1.7$  Hz, 1H), 5.44 – 5.39 (m, 1H), 2.29 (d,  $J = 1.6$  Hz, 3H).  $^{13}C$  NMR (400 MHz,  $CDCl_3$ )  $\delta$  193.3, 168.4, 132.2, 131.7, 130.6, 130.5, 129.0, 128.9, 128.6, 128.1, 127.9, 126.1, 122.3, 121.5, 120.5, 110.3, 109.4, 85.4, 84.6, 65.2, 17.5. HRMS (GC/QTOF)  $m/z$ :  $[M]^+$  calcd for  $C_{29}H_{21}NO$ , 399.1623; found 399.1614.

### 2,3-Diphenyl-8a-(thiophen-2-ylethynyl)indolizin-1(8a*H*)-one (3j)

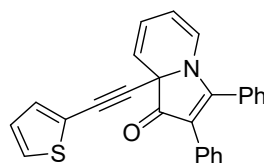

Flash column chromatography on silica gel (eluent: PE/EA = 10/1, v/v) to afford **3j**. Yellow solid (76.3 mg, 65%), mp 193.4-194.3 °C.  $^1H$  NMR (400 MHz,  $CDCl_3$ )  $\delta$  7.46 (td,  $J = 8.5, 4.4$  Hz, 3H), 7.39 (d,  $J = 7.2$  Hz, 2H), 7.25 – 7.22 (m, 2H), 7.18 – 7.11 (m, 5H), 6.96 – 6.90 (m, 1H), 6.39 (d,  $J = 7.2$  Hz, 1H), 6.14 – 6.06 (m, 2H), 5.45 (ddd,  $J = 7.0, 4.4, 2.2$  Hz, 1H).  $^{13}C$  NMR (100 MHz,  $CDCl_3$ )  $\delta$  194.5, 169.3, 133.2, 130.7, 130.3, 129.1, 128.9, 128.8, 128.6, 127.9, 127.8, 126.9, 126.3, 124.0, 123.8, 122.0, 119.8, 110.3, 109.1, 88.7, 79.0, 63.2. HRMS (GC/QTOF)  $m/z$ :  $[M]^+$  calcd for  $C_{26}H_{17}NOS$ , 391.1031; found 391.1030.

### 8A-(naphthalen-2-ylethynyl)-2,3-diphenylindolizin-1(8aH)-one (3k)

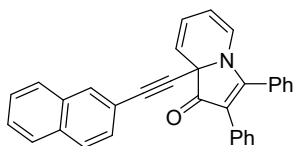

Flash column chromatography on silica gel (eluent: PE/EA = 10/1, v/v) to afford **3k**. Yellow solid (90.5 mg, 70%), mp 202.4-203.5 °C. <sup>1</sup>H NMR (400 MHz, CDCl<sub>3</sub>) δ 8.28 (d, *J* = 8.3 Hz, 1H), 7.82 (d, *J* = 8.1 Hz, 2H), 7.69 (d, *J* = 6.3 Hz, 1H), 7.56 – 7.39 (m, 9H), 7.20 (d, *J* = 4.3 Hz, 4H), 6.48 (d, *J* = 7.2 Hz, 1H), 6.25 – 6.15 (m, 2H), 5.53 (ddd, *J* = 7.0, 5.3, 1.3 Hz, 1H). <sup>13</sup>C NMR (100 MHz, CDCl<sub>3</sub>) δ 194.8, 169.1, 133.4, 133.0, 131.5, 130.9, 130.7, 130.4, 129.2, 129.1, 128.9, 128.7, 128.2, 128.0, 127.0, 126.4, 126.3, 126.1, 125.0, 124.0, 123.7, 120.2, 119.7, 110.5, 109.1, 90.0, 83.9, 63.4. HRMS (GC/QTOF) *m/z*: [*M*]<sup>+</sup> calcd for C<sub>32</sub>H<sub>21</sub>NO, 435.1623; found 435.1632.

### 2,3-Di-*m*-tolyl-8a-((trimethylsilyl)ethynyl)indolizin-1(8aH)-one (3l)

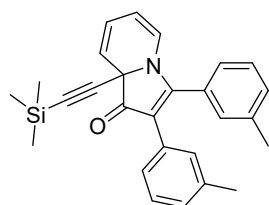

Flash column chromatography on silica gel (eluent: PE/EA = 10/1, v/v) to afford **3l**. Yellow solid (123.9 mg, 68%), mp 220.8-231.4 °C. <sup>1</sup>H NMR (400 MHz, CDCl<sub>3</sub>) δ 7.39 – 7.33 (m, 2H), 7.31 (s, 1H), 7.25 (s, 1H), 7.19 (d, *J* = 7.2 Hz, 1H), 7.14 (s, 1H), 7.07 (d, *J* = 7.6 Hz, 1H), 6.97 (d, *J* = 7.6 Hz, 1H), 6.90 (d, *J* = 7.7 Hz, 1H), 6.40 (d, *J* = 7.2 Hz, 1H), 6.10 – 6.03 (m, 2H), 5.45 (t, *J* = 6.1 Hz, 1H), 2.42 (s, 3H), 2.27 (s, 3H), 0.21 (s, 9H). <sup>13</sup>C NMR (400 MHz, CDCl<sub>3</sub>) δ 194.9, 169.6, 139.0, 137.4, 131.4, 130.5, 129.5, 129.1, 129.0, 128.8, 127.8, 127.0, 126.1, 125.9, 123.9, 123.6, 120.5, 110.2, 108.9, 63.3, 21.5, 21.5, 0.0. HRMS (GC/QTOF) *m/z*: [*M*]<sup>+</sup> calcd for C<sub>27</sub>H<sub>27</sub>NOSi, 409.1862; found 409.1864.

### 8A-ethynyl-2,3-di(thiophen-2-yl)indolizin-1(8aH)-one (3m)

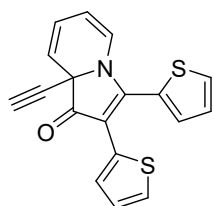

Flash column chromatography on silica gel (eluent: PE/EA = 10/1, v/v) to afford **3m**. Yellow solid (74.4 mg, 63%), mp 231.2-231.8 °C. <sup>1</sup>H NMR (400 MHz, CDCl<sub>3</sub>) δ 7.69 (d, *J* = 3.9 Hz, 1H), 7.35 (d, *J* = 3.7 Hz, 1H), 7.24 (dd, *J* = 5.0, 3.7 Hz, 1H), 7.17 (dd, *J* = 3.6, 1.1 Hz, 1H), 7.13 (d, *J* = 5.1 Hz, 1H), 6.94 – 6.91 (m, 1H), 6.46 (d, *J* = 7.2 Hz, 1H), 6.11 (dd, *J* = 9.0, 5.5 Hz, 1H), 6.02 (d, *J* = 9.1 Hz, 1H), 5.57 – 5.50 (m, 1H), 2.64 (s, 1H). <sup>13</sup>C NMR (400 MHz, CDCl<sub>3</sub>) δ 192.8, 160.5, 131.3, 131.2, 130.6, 128.1, 126.9, 126.6, 125.7, 124.5, 124.4, 123.5, 119.7, 109.6, 107.3, 79.2, 74.3, 62.1. HRMS (GC/QTOF) *m/z*: [*M*]<sup>+</sup> calcd for C<sub>18</sub>H<sub>11</sub>NOS<sub>2</sub>, 321.0282; found 321.0275.

### 8a-(oct-1-yn-1-yl)-2,3-diphenylindolizin-1(8aH)-one (3n)

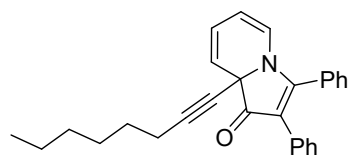

Flash column chromatography on silica gel (eluent: PE/EA = 10/1, v/v) to afford **3n**. Yellow solid (96.6 mg, 82%), mp 221.2-225.3 °C. <sup>1</sup>H NMR (400 MHz, CDCl<sub>3</sub>) δ 7.45 (q, *J* = 7.5, 6.2 Hz, 3H), 7.39 – 7.33 (m, 2H), 7.19 – 7.09 (m, 5H), 6.34 (d, *J* = 7.2 Hz, 1H), 6.03 (d, *J* = 3.3 Hz, 2H), 5.41 (dt, *J* = 6.9, 3.3 Hz, 1H), 2.21 (t, *J* = 7.2 Hz, 2H), 1.49 (q, *J* = 7.3 Hz, 2H), 1.33 – 1.22 (m, 6H), 0.86 (t, *J* = 6.8 Hz, 3H). <sup>13</sup>C NMR (400 MHz, CDCl<sub>3</sub>) δ 195.5, 168.7, 130.6, 130.5, 129.1, 128.0, 128.9, 128.8, 127.9, 126.1, 123.5, 123.1, 120.8, 110.0, 108.8, 86.8, 62.8, 31.2, 28.4, 28.2, 22.5, 19.0, 14.0. HRMS (ESI): calculated C<sub>28</sub>H<sub>27</sub>NaNO [M+Na]<sup>+</sup>: 416.1990; found 416.1991.

### 2,3,8a-triphenylindolizin-1(8aH)-one (4a)

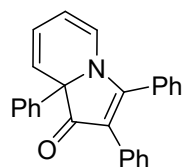

Flash column chromatography on silica gel (eluent: PE/EA = 10/1, v/v) to afford **4a**. Yellow solid (21.6 mg, 20%), mp 243.2-244.4 °C. <sup>1</sup>H NMR (400 MHz, CDCl<sub>3</sub>) δ 7.59 (d, *J* = 8.6 Hz, 2H), 7.53 – 7.46 (m, 5H), 7.36 (t, *J* = 7.5 Hz, 2H), 7.31 – 7.25 (m, 2H), 7.14 – 7.10 (m, 4H), 6.53 (d, *J* = 7.2 Hz, 1H), 6.42 (d, *J* = 9.2 Hz, 1H), 6.07 (dd, *J* = 9.2, 5.5 Hz, 1H), 5.34 (t, *J* = 6.4 Hz, 1H). <sup>13</sup>C NMR (400 MHz, CDCl<sub>3</sub>) δ 198.8, 169.5, 140.6, 130.6, 129.2, 129.1, 128.9, 128.7, 127.9, 127.8, 126.0, 124.4, 124.2, 123.1, 122.9, 110.7, 109.1. HRMS (ESI): calculated C<sub>26</sub>H<sub>20</sub>NO [M+H]<sup>+</sup>: 362.1545; found 362.1541.

### 10B-methyl-2,3-diphenylpyrrolo[2,1-a]isoquinolin-1(10bH)-one (6a)

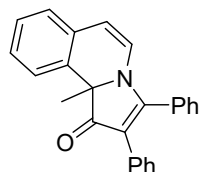

Flash column chromatography on silica gel (eluent: PE/EA = 1/1, v/v) to afford **6a**. Yellow solid (81.7mg, 78%), mp 206.7-207.2 °C. <sup>1</sup>H NMR (400 MHz, CDCl<sub>3</sub>) δ 8.31 – 8.24 (m, 1H), 7.48 – 7.42 (m, 3H), 7.34 (d, *J* = 6.2 Hz, 2H), 7.23 (dd, *J* = 5.2, 3.0 Hz, 2H), 7.16 (d, *J* = 4.4 Hz, 4H), 7.11 – 7.04 (m, 2H), 6.47 (d, *J* = 7.4 Hz, 1H), 5.88 (d, *J* = 7.4 Hz, 1H), 1.71 (s, 3H). <sup>13</sup>C NMR (100 MHz, CDCl<sub>3</sub>) δ 198.9, 166.0, 133.2, 130.9, 130.8, 130.3, 129.2, 129.1, 128.9, 128.8, 127.9, 127.7, 126.8, 126.0, 125.8, 123.8, 122.2, 111.7, 110.9, 66.4, 28.5. HRMS (GC/QTOF) *m/z*: [M]<sup>+</sup> calcd for C<sub>25</sub>H<sub>19</sub>NO, 349.1467; found 349.1474.

### 2,3,10B-triphenylpyrrolo[2,1-a]isoquinolin-1(10bH)-one (6b)

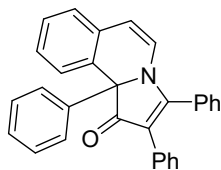

Flash column chromatography on silica gel (eluent: PE/EA = 5/1, v/v) to afford **6b**.

Yellow solid (109.1 mg, 69%), mp 245.3-245.8 °C. <sup>1</sup>H NMR (400 MHz, CDCl<sub>3</sub>) δ 8.54 (d, *J* = 7.7 Hz, 1H), 7.51 – 7.40 (m, 7H), 7.36 (d, *J* = 7.7 Hz, 1H), 7.28 (t, *J* = 7.2

Hz, 3H), 7.22 (d, *J* = 7.2 Hz, 1H), 7.15 – 7.05 (m, 6H), 6.59 (d, *J* = 7.3 Hz, 1H), 5.85

(d, *J* = 7.4 Hz, 1H). <sup>13</sup>C NMR (100 MHz, CDCl<sub>3</sub>) δ 196.4, 167.6, 139.1, 132.0, 131.3, 130.7, 130.6, 129.2,

129.1, 128.9, 128.9, 128.6, 128.1, 127.9, 127.8, 126.6, 126.2, 126.1, 125.4, 125.3, 122.9, 112.0, 111.9, 70.8.

HRMS (GC/QTOF) *m/z*: [M]<sup>+</sup> calcd for C<sub>30</sub>H<sub>21</sub>NO, 411.1623; found 411.1631.

### 2,3-Diphenyl-10b-(*p*-tolyl)pyrrolo[2,1-*a*]isoquinolin-1(10bH)-one (**6c**)

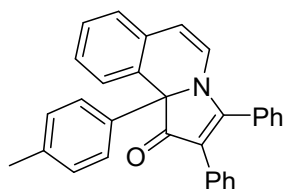

Flash column chromatography on silica gel (eluent: PE/EA = 5/1, v/v) to afford

**6c**. Yellow solid (114.4 mg, 67%), mp 245.3-245.8 °C. <sup>1</sup>H NMR (400 MHz, CDCl<sub>3</sub>) δ 8.52 (d, *J* = 8.0 Hz, 1H), 7.51 – 7.42 (m, 5H), 7.32 – 7.26 (m, 3H), 7.14

– 7.05 (m, 7H), 6.58 (d, *J* = 7.3 Hz, 1H), 5.85 (d, *J* = 7.3 Hz, 1H), 2.26 (s, 3H).

<sup>13</sup>C NMR (100 MHz, CDCl<sub>3</sub>) δ 196.6, 167.5, 137.6, 136.3, 132.0, 131.5, 130.6, 130.5, 129.3, 129.2, 129.1,

129.0, 128.9, 128.1, 127.9, 126.6, 126.2, 126.1, 125.3, 125.2, 122.8, 111.9, 70.7, 21.0. HRMS (GC/QTOF)

*m/z*: [M]<sup>+</sup> calcd for C<sub>31</sub>H<sub>23</sub>NO, 425.1780; found 425.1789.

### 10B-(4-methoxyphenyl)-2,3-diphenylpyrrolo[2,1-*a*]isoquinolin-1(10bH)-one (**6d**)

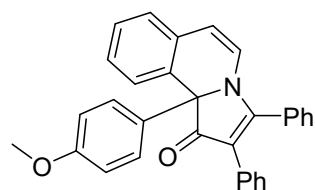

Flash column chromatography on silica gel (eluent: PE/EA= 5/1, v/v) to afford

**6d**. Yellow solid (121.2 mg, 62%), mp 243.2-244.0 °C. <sup>1</sup>H NMR (400 MHz, CDCl<sub>3</sub>) δ 8.50 (d, *J* = 7.7 Hz, 1H), 7.52 – 7.42 (m, 5H), 7.35 – 7.26 (m, 4H),

7.16 – 7.05 (m, 6H), 6.85 – 6.78 (m, 2H), 6.57 (d, *J* = 7.3 Hz, 1H), 5.86 (d, *J* =

7.3 Hz, 1H), 3.72 (s, 3H). <sup>13</sup>C NMR (101 MHz, CDCl<sub>3</sub>) δ 196.9, 167.5, 159.2, 132.0, 131.5, 131.4, 130.7,

130.6, 129.2, 129.1, 128.9, 128.1, 127.9, 126.7, 126.6, 126.2, 126.1, 125.2, 122.8, 114.0, 112.0, 111.9, 70.4,

55.3. HRMS (GC/QTOF) *m/z*: [M]<sup>+</sup> calcd for C<sub>31</sub>H<sub>23</sub>NO<sub>2</sub>, 441.1729; found 441.1738.

### 10B-methyl-2,3-di-*m*-tolylpyrrolo[2,1-*a*]isoquinolin-1(10bH)-one (**6e**)

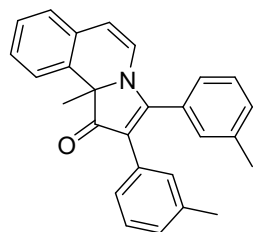

Flash column chromatography on silica gel (eluent: PE/EA= 5/1, v/v) to afford **6e**.

Yellow solid (99.6 mg, 65%), mp 243.2-244.0 °C. <sup>1</sup>H NMR (400 MHz, CDCl<sub>3</sub>) δ

8.28 (d,  $J = 3.6$  Hz, 1H), 7.30 (dd,  $J = 14.8, 7.5$  Hz, 2H), 7.23 – 7.20 (m, 2H), 7.15 (d,  $J = 5.7$  Hz, 2H), 7.11 (d,  $J = 7.2$  Hz, 1H), 7.06 – 6.99 (m, 2H), 6.90 (d,  $J = 7.6$  Hz, 1H), 6.83 (d,  $J = 7.8$  Hz, 1H), 6.46 (d,  $J = 7.4$  Hz, 1H), 5.86 (d,  $J = 7.4$  Hz, 1H), 2.35 (s, 3H), 2.22 (s, 3H), 1.70 (s, 3H).  $^{13}\text{C}$  NMR (101 MHz,  $\text{CDCl}_3$ )  $\delta$  199.1, 166.3, 138.9, 137.3, 133.3, 131.1, 130.9, 130.8, 129.5, 129.2, 129.1, 129.0, 127.8, 127.7, 127.5, 126.9, 126.8, 126.0, 125.8, 125.7, 123.8, 122.4, 111.6, 110.7, 66.3, 28.6, 21.5. HRMS (ESI): calculated  $\text{C}_{27}\text{H}_{24}\text{NO}$   $[\text{M}+\text{H}]^+$ : 377.1780, found 378.1855.

### 10B-methyl-2,3-di(thiophen-2-yl)pyrrolo[2,1-*a*]isoquinolin-1(10*bH*)-one (6f)

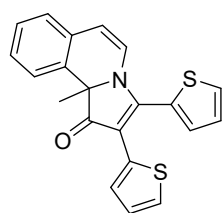

Flash column chromatography on silica gel (eluent: PE/EA = 5/1, v/v) to afford **6f**.

Yellow solid (78.9 mg, 60%), mp 234.8-235.2 °C.  $^1\text{H}$  NMR (400 MHz,  $\text{CDCl}_3$ )  $\delta$  7.58 (d,  $J = 5.0$  Hz, 1H), 7.46 (d,  $J = 3.8$  Hz, 1H), 7.24 (dd,  $J = 5.1, 1.1$  Hz, 1H), 7.21 – 7.15 (m, 2H), 7.10 – 7.04 (m, 2H), 6.96 (d,  $J = 7.4$  Hz, 1H), 6.92 – 6.85 (m, 2H), 6.79 (d,  $J =$

7.8 Hz, 1H), 6.12 (d,  $J = 7.3$  Hz, 1H), 1.73 (s, 3H).  $^{13}\text{C}$  NMR (100 MHz,  $\text{CD}_2\text{Cl}_2$ )  $\delta$  167.3, 149.0, 137.9, 136.1, 133.9, 132.9, 131.8, 131.1, 130.8, 130.7, 130.0, 129.8, 129.5, 129.1, 128.9, 128.6, 125.3, 122.8, 115.0, 67.4, 29.2. HRMS GC/QTOF ( $m/z$ ):  $[\text{M}]^+$  calcd for  $\text{C}_{21}\text{H}_{15}\text{NOS}_2$ , 361.0595; found: 361.0599.

### 2,3-Bis(4-fluorophenyl)-10b-methylpyrrolo[2,1-*a*]isoquinolin-1(10*bH*)-one (6g)

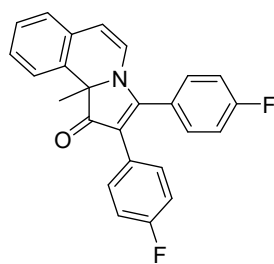

Flash column chromatography on silica gel (eluent: PE/EA = 10/1, v/v) to afford

**6g**. Yellow solid (112.0 mg, 57%), mp 243.4-244.6 °C.  $^1\text{H}$  NMR (400 MHz,  $\text{CDCl}_3$ )  $\delta$  8.30 – 8.17 (m, 1H), 7.34 (dd,  $J = 8.3, 5.3$  Hz, 2H), 7.27 – 7.23 (m, 3H), 7.17 (t,  $J = 8.4$  Hz, 2H), 7.13 – 7.04 (m, 3H), 6.94 – 6.84 (m, 2H), 6.45 (d,  $J = 7.3$  Hz, 1H), 5.92 (d,  $J = 7.4$  Hz, 1H), 1.70 (s, 3H).  $^{13}\text{C}$  NMR (400 MHz,  $\text{CDCl}_3$ )  $\delta$

198.7, 164.8, 133.2, 131.0 (d,  $J = 8.6$  Hz), 130.6, 130.5, 130.4, 127.8, 127.0, 125.9, 123.7, 121.9, 116.6 (d,  $J = 21.9$  Hz), 115.1 (d,  $J = 21.3$  Hz), 111.4, 111.1, 66.6, 28.4. HRMS (GC/QTOF)  $m/z$ :  $[\text{M}]^+$  calcd for  $\text{C}_{25}\text{H}_{17}\text{F}_2\text{NO}$ , 385.1278; found 385.1268.

### 2,3-Diphenyl-10b-(phenylethynyl)pyrrolo[2,1-*a*]isoquinolin-1(10*bH*)-one (6h)

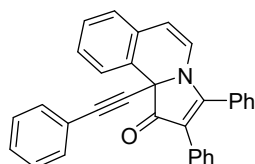

Flash column chromatography on silica gel (eluent: PE/EA = 10/1, v/v) to afford

**6h**. Yellow solid (103.7 mg, 73%), mp 252.3-253.7 °C.  $^1\text{H}$  NMR (400 MHz,  $\text{CDCl}_3$ )  $\delta$  8.46 – 8.37 (m, 1H), 7.46 – 7.31 (m, 7H), 7.30 – 7.24 (m, 2H), 7.22 –

7.12 (m, 7H), 7.12 – 7.06 (m, 2H), 6.48 (d,  $J = 7.3$  Hz, 1H), 5.98 (d,  $J = 7.3$  Hz, 1H).  $^{13}\text{C}$  NMR (400 MHz,  $\text{CDCl}_3$ )  $\delta$  193.1, 167.7, 132.2, 131.2, 130.7, 130.5, 130.3, 129.2, 129.1, 128.9, 128.8, 128.7, 128.2, 128.0, 127.4, 126.4, 126.2, 124.5, 122.7, 122.1, 112.1, 111.7, 86.6, 84.7, 62.2. HRMS (GC/QTOF)  $m/z$ :  $[\text{M}]^+$  calcd for  $\text{C}_{32}\text{H}_{21}\text{NO}$ , 435.1623; found 435.1618.

#### 10B-((4-pentylphenyl)ethynyl)-2,3-diphenylpyrrolo[2,1-*a*]isoquinolin-1(10b*H*)-one (6i)

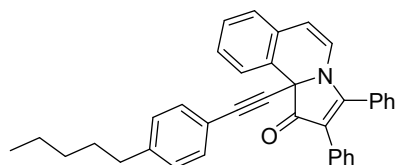

Flash column chromatography on silica gel (eluent: PE/EA = 10/1, v/v) to afford **6i**. Yellow solid (92.3 mg, 65%), mp 265.2-266.4 °C.  $^1\text{H}$  NMR (400 MHz,  $\text{CDCl}_3$ )  $\delta$  8.46 – 8.35 (m, 1H), 7.47 (q,  $J = 7.3$ , 6.1 Hz, 3H), 7.40 (d,  $J = 7.1$  Hz, 2H), 7.31 (d,  $J = 8.3$  Hz, 4H), 7.19 (d,  $J = 4.3$  Hz,

4H), 7.15 – 7.11 (m, 2H), 7.06 (d,  $J = 7.9$  Hz, 2H), 6.52 (d,  $J = 7.4$  Hz, 1H), 6.01 (d,  $J = 7.4$  Hz, 1H), 2.55 (t,  $J = 7.7$  Hz, 2H), 1.60 – 1.51 (m, 2H), 1.32 – 1.24 (m, 4H), 0.87 (t,  $J = 6.9$  Hz, 3H).  $^{13}\text{C}$  NMR (400 MHz,  $\text{CDCl}_3$ )  $\delta$  193.2, 167.5, 143.8, 132.0, 131.1, 130.6, 130.5, 130.4, 129.1, 129.0, 128.9, 128.8, 128.5, 128.2, 127.9, 127.3, 126.2, 126.0, 124.5, 122.6, 119.2, 111.9, 111.6, 85.8, 77.2, 62.2, 35.8, 31.3, 30.9, 22.5, 14.0. HRMS (ESI): calculated  $\text{C}_{37}\text{H}_{32}\text{NO}$   $[\text{M}+\text{H}]^+$ : 506.2485, found 506.2481.

#### 10b-((4-fluorophenyl)ethynyl)-2,3-diphenylpyrrolo[2,1-*a*]isoquinolin-1(10b*H*)-one (6j)

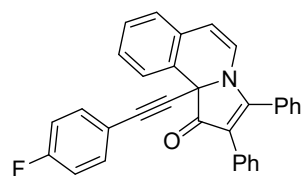

Flash column chromatography on silica gel (eluent: PE/EA = 10/1, v/v) to afford **6j**. Yellow solid (112.5 mg, 70%), mp 220.4-221.5 °C.  $^1\text{H}$  NMR (400 MHz,  $\text{CDCl}_3$ )  $\delta$  8.43 – 8.36 (m, 1H), 7.48 (q,  $J = 7.2$ , 6.1 Hz, 3H), 7.42 – 7.36 (m, 4H), 7.34 – 7.30 (m, 2H), 7.19 (d,  $J = 4.3$  Hz, 4H), 7.16 – 7.12 (m, 2H), 6.94 (t,  $J =$

8.5 Hz, 2H), 6.53 (d,  $J = 7.3$  Hz, 1H), 6.02 (d,  $J = 7.3$  Hz, 1H).  $^{13}\text{C}$  NMR (400 MHz,  $\text{CDCl}_3$ )  $\delta$  193.0, 167.7, 134.1 (d,  $J = 8.5$  Hz), 131.1, 130.7, 130.4, 130.1, 129.1, 129.0, 128.9, 128.7, 128.6, 128.0, 127.4, 126.2 (d,  $J = 19.4$  Hz), 124.4, 122.6, 115.5, 115.3, 112.0, 111.6, 86.2, 83.5, 62.0. HRMS (GC/QTOF)  $m/z$ :  $[\text{M}]^+$  calcd for  $\text{C}_{32}\text{H}_{20}\text{FNO}$ , 435.1529; found 435.1519.

#### 10B-((4-methoxyphenyl)ethynyl)-2,3-diphenylpyrrolo[2,1-*a*]isoquinolin-1(10b*H*)-one (6k)

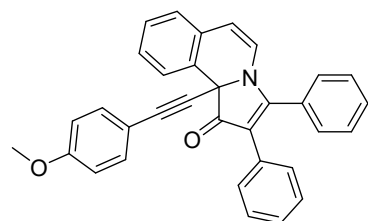

Flash column chromatography on silica gel (eluent: PE/EA = 10/1, v/v) to afford **6k**. Yellow solid (103.6 mg, 68%), mp 245.2-246.7 °C.  $^1\text{H}$  NMR (400 MHz,  $\text{CDCl}_3$ )  $\delta$  8.50 (d,  $J = 7.0$  Hz, 1H), 7.52 – 7.46 (m, 3H), 7.43 (d,

$J = 7.1$  Hz, 2H), 7.39 – 7.33 (m, 4H), 7.30 – 7.21 (m, 5H), 7.18 (d,  $J = 6.6$  Hz, 2H), 6.80 (d,  $J = 8.7$  Hz, 2H), 6.57 (d,  $J = 7.4$  Hz, 1H), 6.06 (d,  $J = 7.4$  Hz, 1H), 3.76 (s, 3H).  $^{13}\text{C}$  NMR (400 MHz,  $\text{CDCl}_3$ )  $\delta$  193.3, 167.6, 133.7, 131.1, 130.6, 130.5, 130.4, 129.1, 129.0, 128.9, 128.8, 128.5, 128.0, 127.3, 126.3, 126.1, 124.5, 122.7, 114.2, 113.7, 112.0, 111.5, 85.2, 84.6, 55.3. HRMS (GC/QTOF)  $m/z$ :  $[\text{M}]^+$  calcd for  $\text{C}_{33}\text{H}_{23}\text{NO}_2$ , 465.1729; found 465.1725.

#### Methyl (*E*)-3-(1-oxo-2,3-diphenylindolizin-8a(1*H*)-yl)-2-phenylacrylate (**8a**)

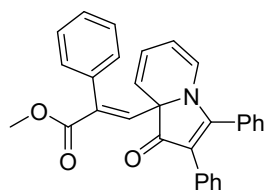

Flash column chromatography on silica gel (eluent: PE/EA = 7/1, v/v) to afford **8a**.

Yellow solid (85.7 mg, 70%), mp 234.8-235.2 °C.  $^1\text{H}$  NMR (400 MHz,  $\text{CDCl}_3$ )  $\delta$  7.50 (d,  $J = 8.0$  Hz, 2H), 7.37 (dd,  $J = 18.8, 7.5$  Hz, 3H), 7.20 – 7.11 (m, 5H), 7.09 – 7.03 (m, 2H), 6.91 (s, 1H), 6.72 (d,  $J = 7.6$  Hz, 2H), 6.02 – 5.88 (m, 3H), 5.35 (ddd,  $J = 6.8, 5.2, 1.3$  Hz, 1H), 3.68 (s, 3H).  $^{13}\text{C}$  NMR (100 MHz,  $\text{CDCl}_3$ )  $\delta$  196.0, 170.1, 166.9, 140.7, 133.7, 131.6, 131.5, 130.7, 130.6, 130.3, 129.0, 128.9, 128.8, 128.0, 126.3, 124.9, 123.4, 122.3, 121.4, 110.8, 110.0, 70.6, 52.6. HRMS (GC/QTOF)  $m/z$ :  $[\text{M}]^+$  calcd for  $\text{C}_{30}\text{H}_{23}\text{NO}_3$ , 445.1678; found 445.1684.

#### Methyl (*E*)-3-(1-oxo-2,3-diphenylindolizin-8a(1*H*)-yl)-2-(*p*-tolyl)acrylate (**8b**)

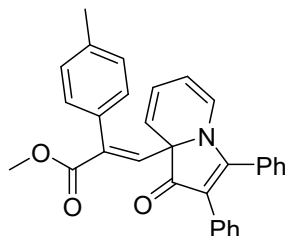

Flash column chromatography on silica gel (eluent: PE/EA = 5/1, v/v) to afford

**8b**. Yellow solid (114.1 mg, 65%), mp 234.8-235.2 °C.  $^1\text{H}$  NMR (400 MHz,  $\text{CDCl}_3$ )  $\delta$  7.38 – 7.34 (m, 1H), 7.25 (d,  $J = 1.6$  Hz, 2H), 7.14 (ddd,  $J = 17.4, 7.4, 2.3$  Hz, 7H), 7.08 – 7.04 (m, 2H), 6.88 (s, 1H), 6.66 (d,  $J = 7.6$  Hz, 2H), 6.00 – 5.90 (m, 3H), 5.37 – 5.31 (m, 1H), 3.67 (s, 3H), 2.43 (s, 3H).  $^{13}\text{C}$  NMR (100 MHz,  $\text{CDCl}_3$ )  $\delta$  196.4, 170.2, 167.6, 139.4, 137.6, 132.3, 131.7, 131.5, 130.6, 130.4, 129.7, 129.1, 128.8, 128.4, 128.3, 128.2, 127.9, 126.2, 125.0, 123.3, 121.7, 110.5, 110.0, 70.7, 52.5, 21.3. HRMS (GC/QTOF)  $m/z$ :  $[\text{M}]^+$  calcd for  $\text{C}_{31}\text{H}_{25}\text{NO}_3$ , 459.1834; found 459.1836.

#### Methyl (*E*)-2-(4-methoxyphenyl)-3-(1-oxo-2,3-diphenylindolizin-8a(1*H*)-yl)acrylate (**8c**)

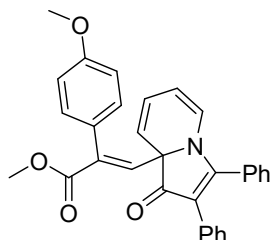

Flash column chromatography on silica gel (eluent: PE/EA = 5/1, v/v) to afford **8c**.

Brown solid (95.3 mg, 64%), mp 247.5-247.9 °C.  $^1\text{H}$  NMR (400 MHz,  $\text{CDCl}_3$ )  $\delta$  7.39 (t,  $J = 7.6$  Hz, 1H), 7.29 (t,  $J = 7.7$  Hz, 2H), 7.20 – 7.04 (m, 8H), 6.90 – 6.85



(m, 3H), 6.84 – 6.78 (m, 2H), 5.99 (d,  $J = 7.2$  Hz, 1H), 5.91 (d,  $J = 4.6$  Hz, 2H), 5.33 (ddd,  $J = 6.9, 4.5, 2.0$  Hz, 1H), 3.83 (s, 3H), 3.68 (s, 3H).  $^{13}\text{C}$  NMR (100 MHz,  $\text{CDCl}_3$ )  $\delta$  195.2, 168.9, 166.6, 158.3, 139.1, 131.7, 130.0, 129.5, 129.4, 128.0, 127.9, 127.7, 127.5, 127.2, 126.9, 125.8, 125.1, 123.7, 122.1, 120.7, 111.9, 109.7, 108.9, 69.7, 54.2, 51.4. HRMS (GC/QTOF)  $m/z$ :  $[\text{M}]^+$  calcd for  $\text{C}_{31}\text{H}_{25}\text{NO}_4$ , 475.1784; found 475.1781.

**Methyl (*E*)-2-(4-bromophenyl)-3-(1-oxo-2,3-diphenylindolizin-8a(1*H*)-yl)acrylate (8d)**

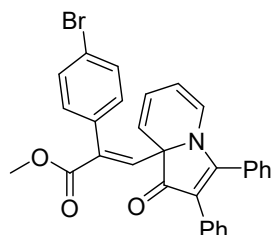

Flash column chromatography on silica gel (eluent: PE/EA = 5/1, v/v) to afford **8d**.

Brown solid (115.8 mg, 62%), mp 252.3-253.0 °C.  $^1\text{H}$  NMR (400 MHz,  $\text{CDCl}_3$ )  $\delta$

7.50 (d,  $J = 8.0$  Hz, 2H), 7.42 – 7.31 (m, 4H), 7.20 – 7.11 (m, 6H), 7.08 – 7.04 (m, 2H), 6.91 (s, 1H), 6.72 (d,  $J = 7.6$  Hz, 2H), 5.99 – 5.88 (m, 3H), 5.35 (dd,  $J = 7.0,$

5.4 Hz, 1H), 3.68 (d,  $J = 1.3$  Hz, 3H).  $^{13}\text{C}$  NMR (100 MHz,  $\text{CDCl}_3$ )  $\delta$  196.0, 170.1, 166.9, 140.7, 133.6, 131.6, 131.5, 130.7, 130.6, 130.3, 128.9, 128.9, 128.8, 128.1, 128.0, 127.9, 126.3, 124.9, 123.5, 122.3, 121.4, 110.8, 110.0, 70.7, 52.6. HRMS (ESI): calculated  $\text{C}_{30}\text{H}_{22}\text{BrNaNO}_3$   $[\text{M}+\text{Na}]^+$ : 546.0681, found 546.0676.

### 3. NMR spectra for new compounds

$^1\text{H}$  NMR (400 MHz,  $\text{CDCl}_3$ ) and  $^{13}\text{C}$  NMR (100 MHz,  $\text{CDCl}_3$ ) spectrum of compound **3a**

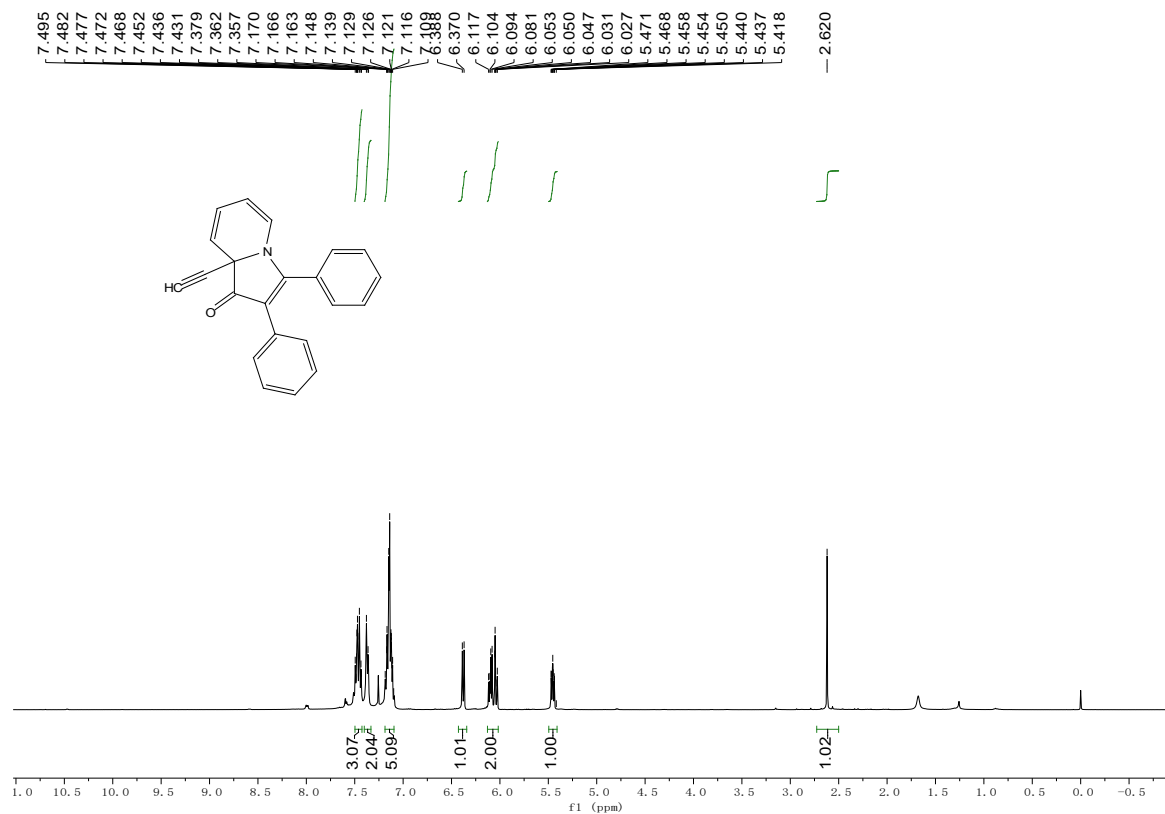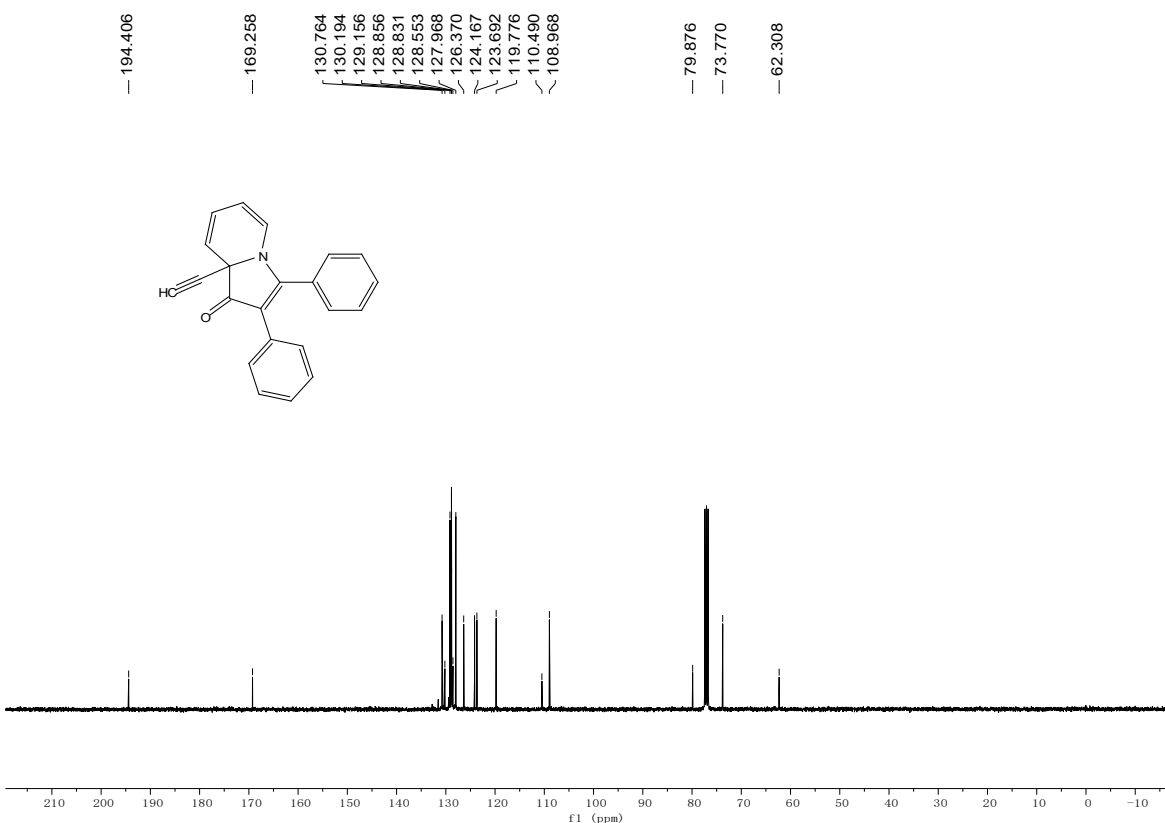

$^1\text{H}$  NMR (400 MHz,  $\text{CDCl}_3$ ) and  $^{13}\text{C}$  NMR (100 MHz,  $\text{CDCl}_3$ ) spectrum of compound **3b**

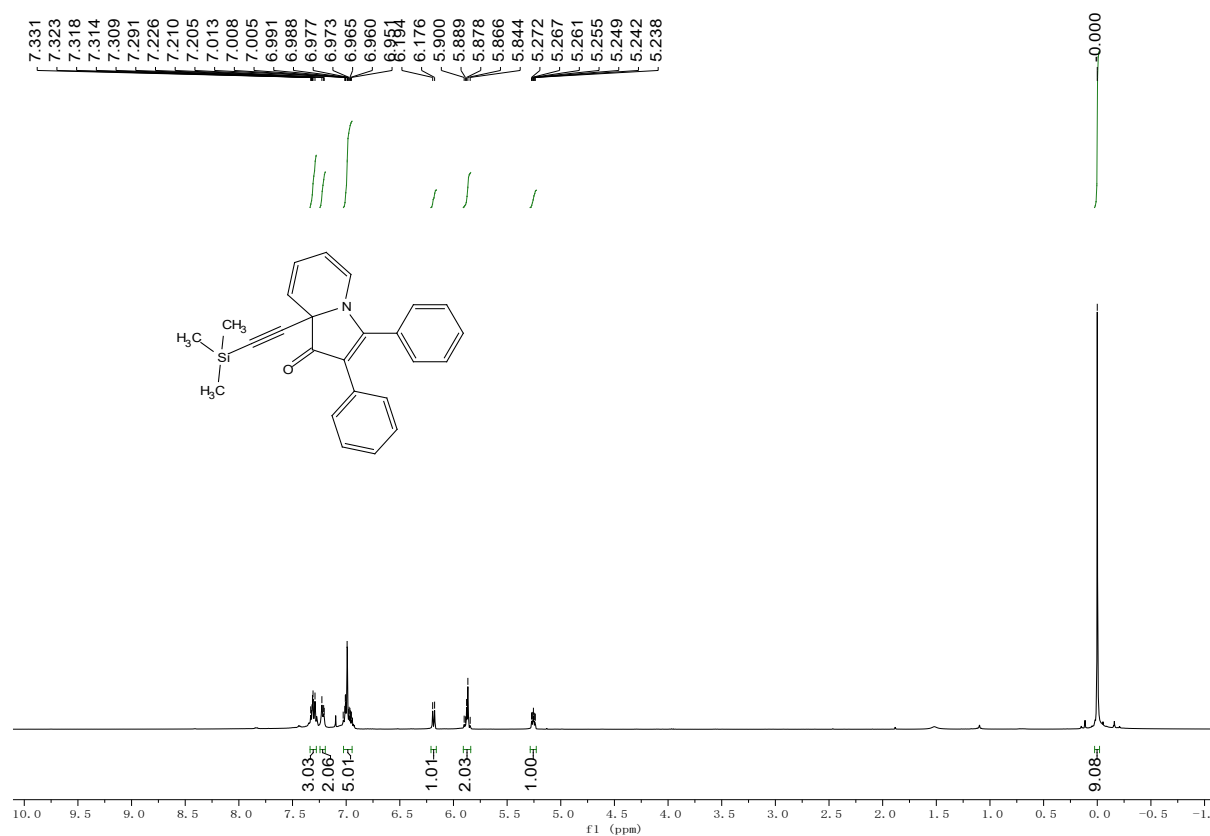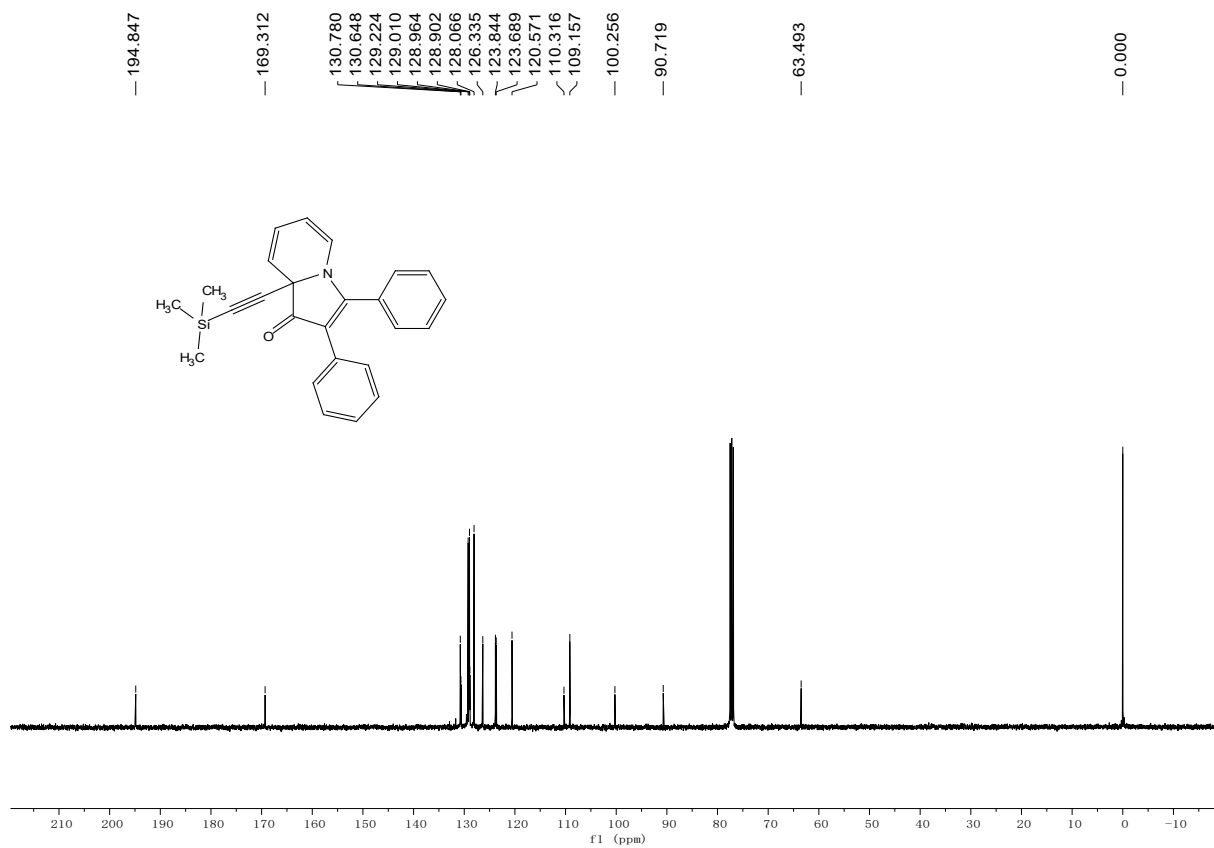

$^1\text{H}$  NMR (400 MHz,  $\text{CDCl}_3$ ) and  $^{13}\text{C}$  NMR (100 MHz,  $\text{CDCl}_3$ ) spectrum of compound **3c**

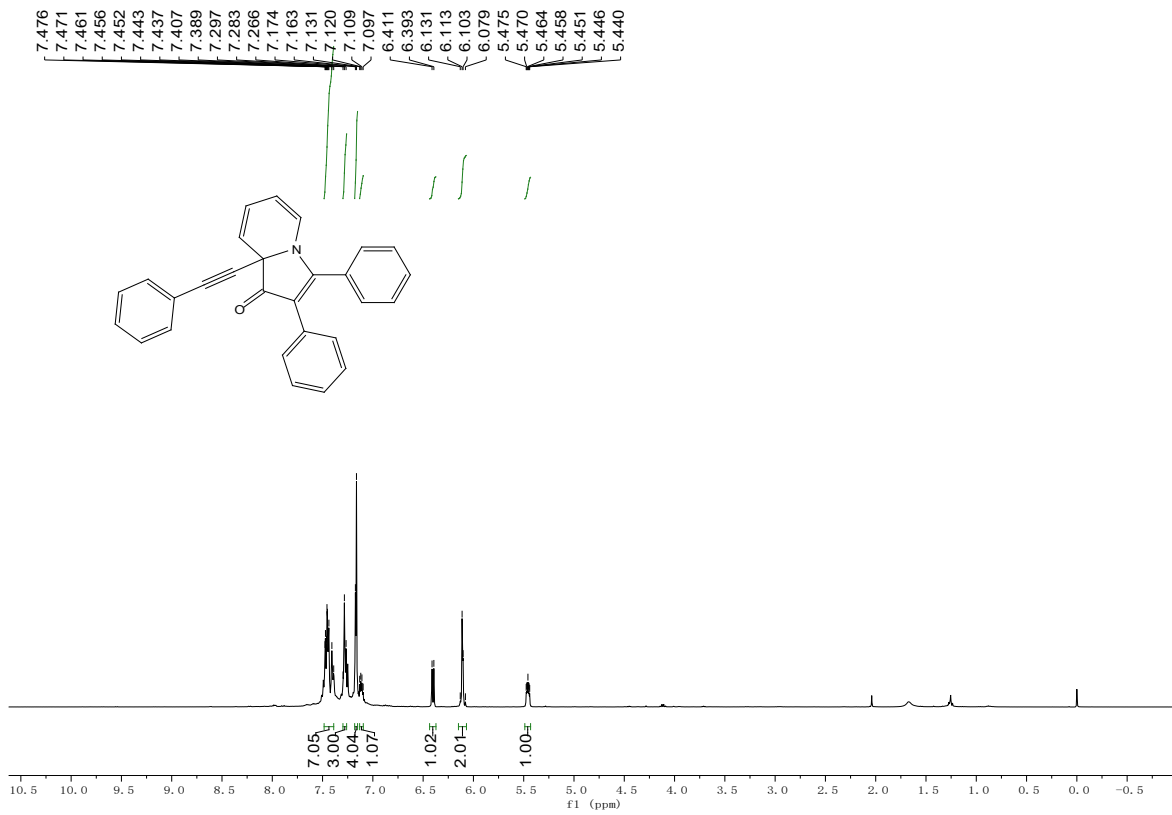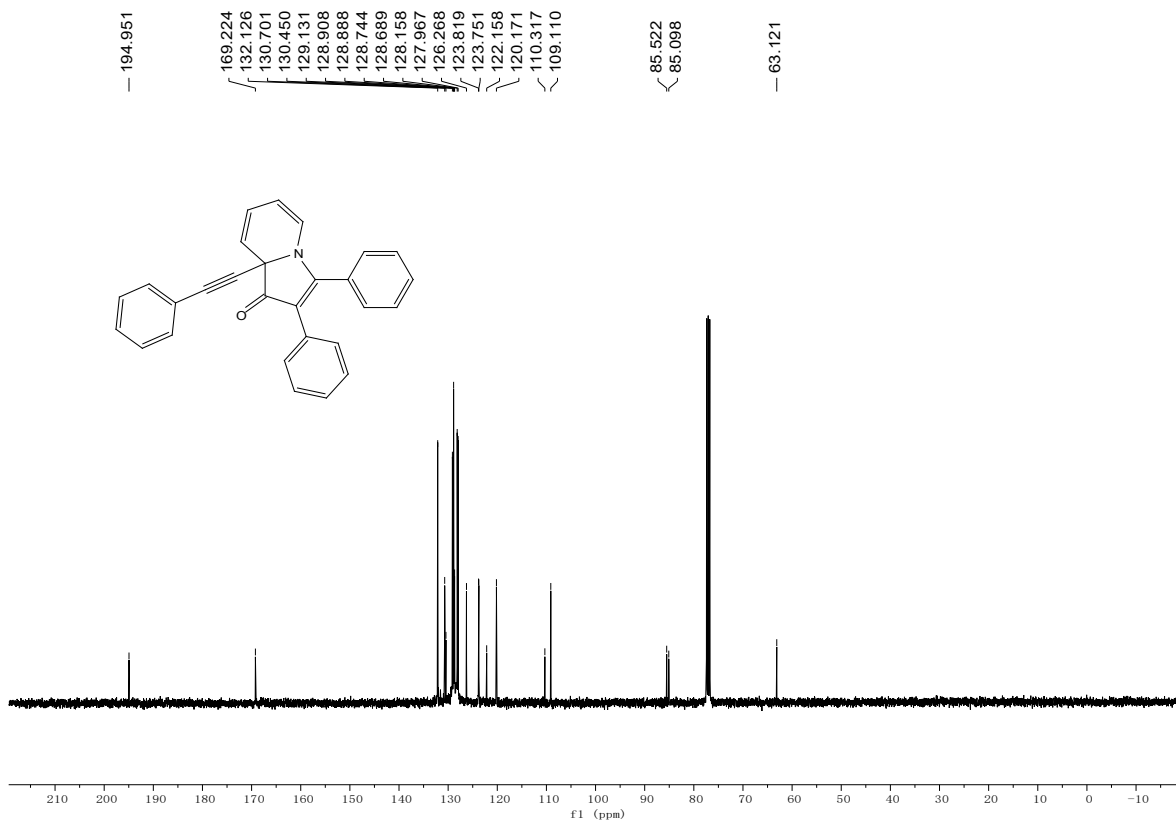

$^1\text{H}$  NMR (400 MHz,  $\text{CDCl}_3$ ) and  $^{13}\text{C}$  NMR (100 MHz,  $\text{CDCl}_3$ ) spectrum of compound **3d**

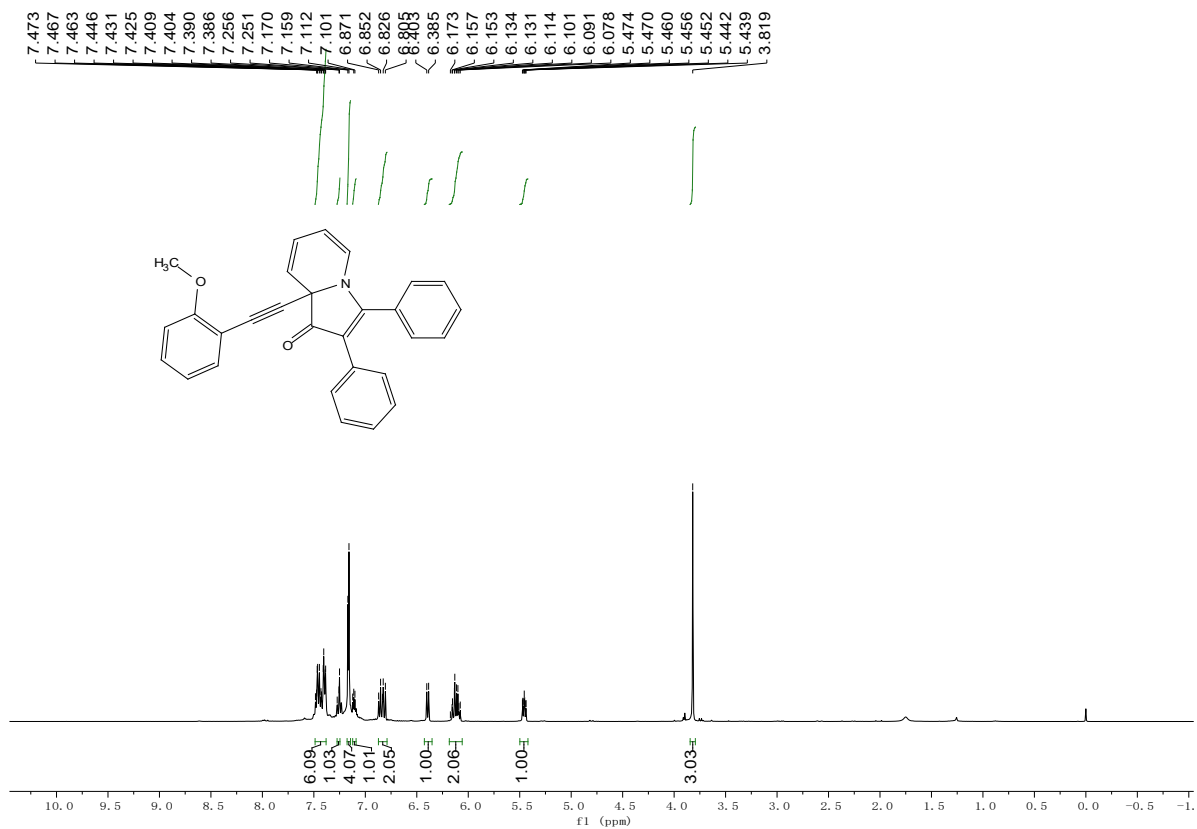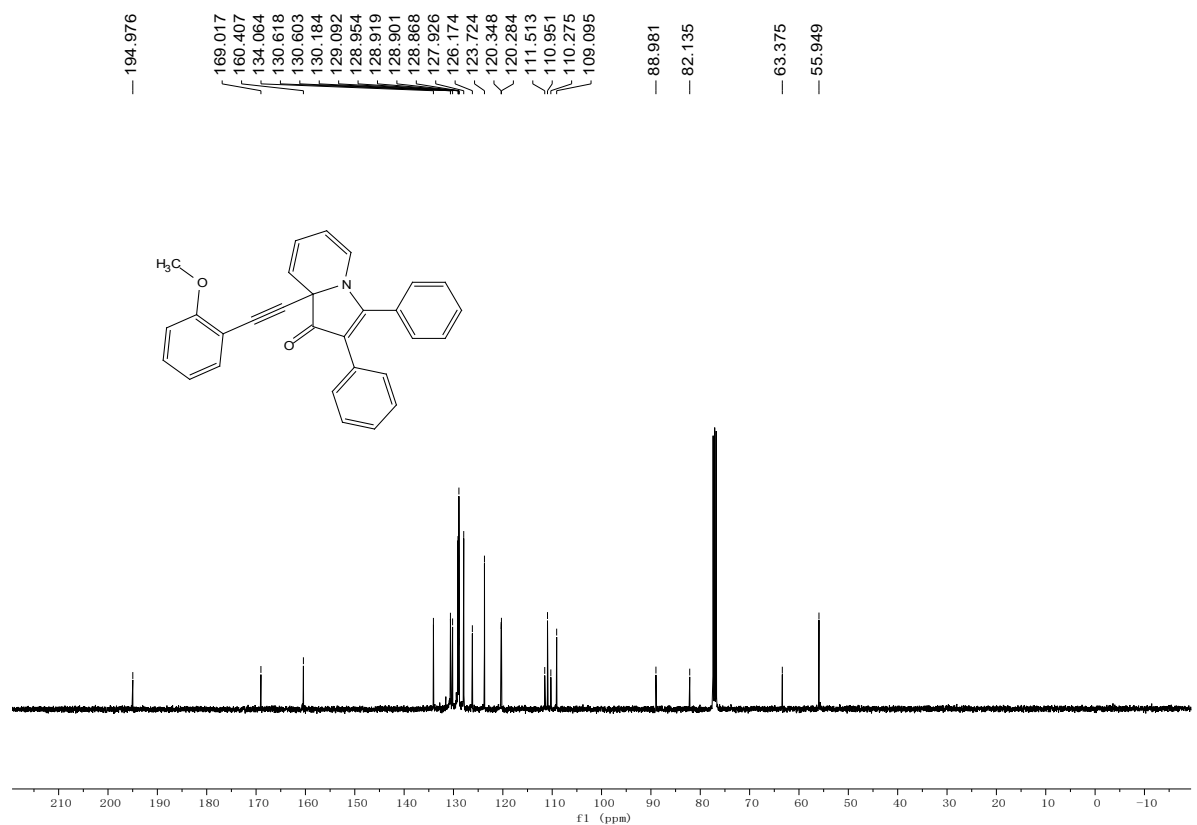

$^1\text{H}$  NMR (400 MHz,  $\text{CDCl}_3$ ) and  $^{13}\text{C}$  NMR (100 MHz,  $\text{CDCl}_3$ ) spectrum of compound **3e**

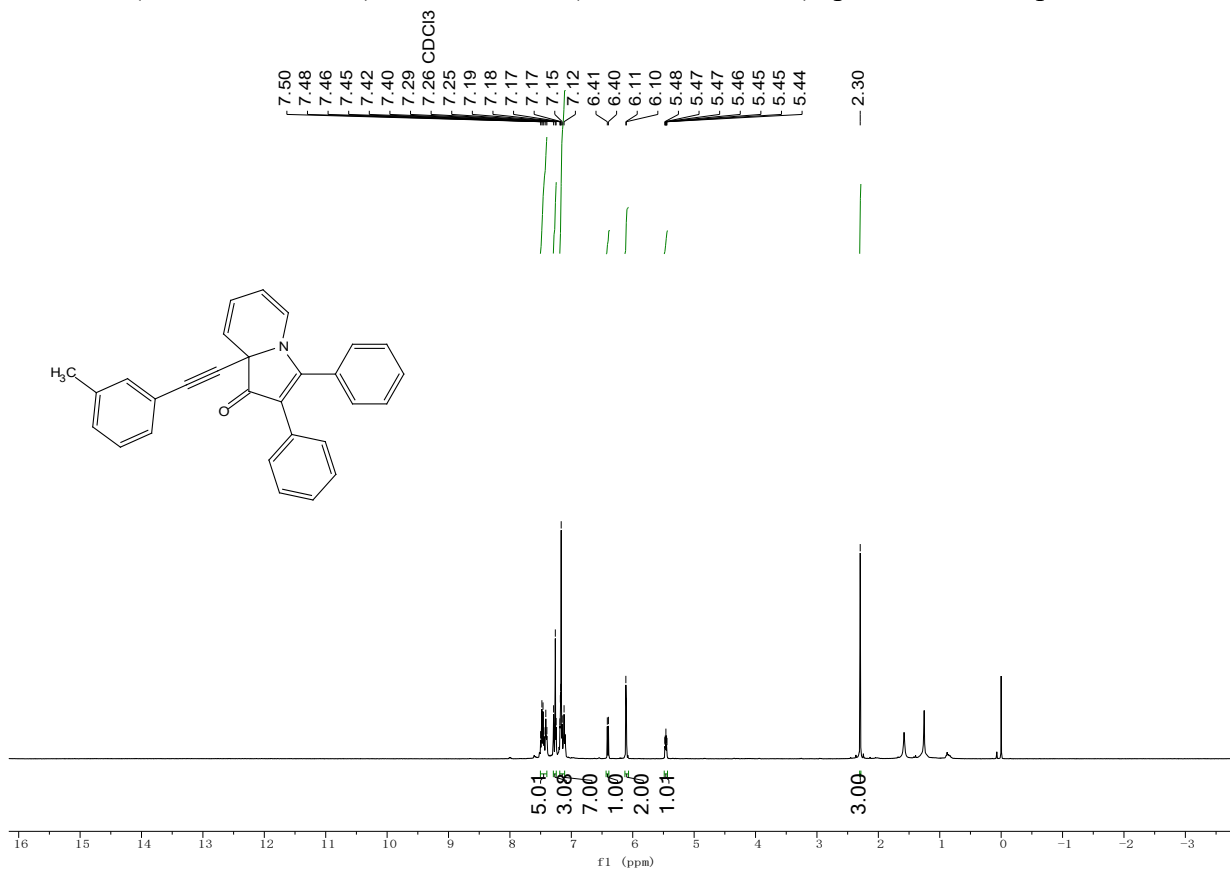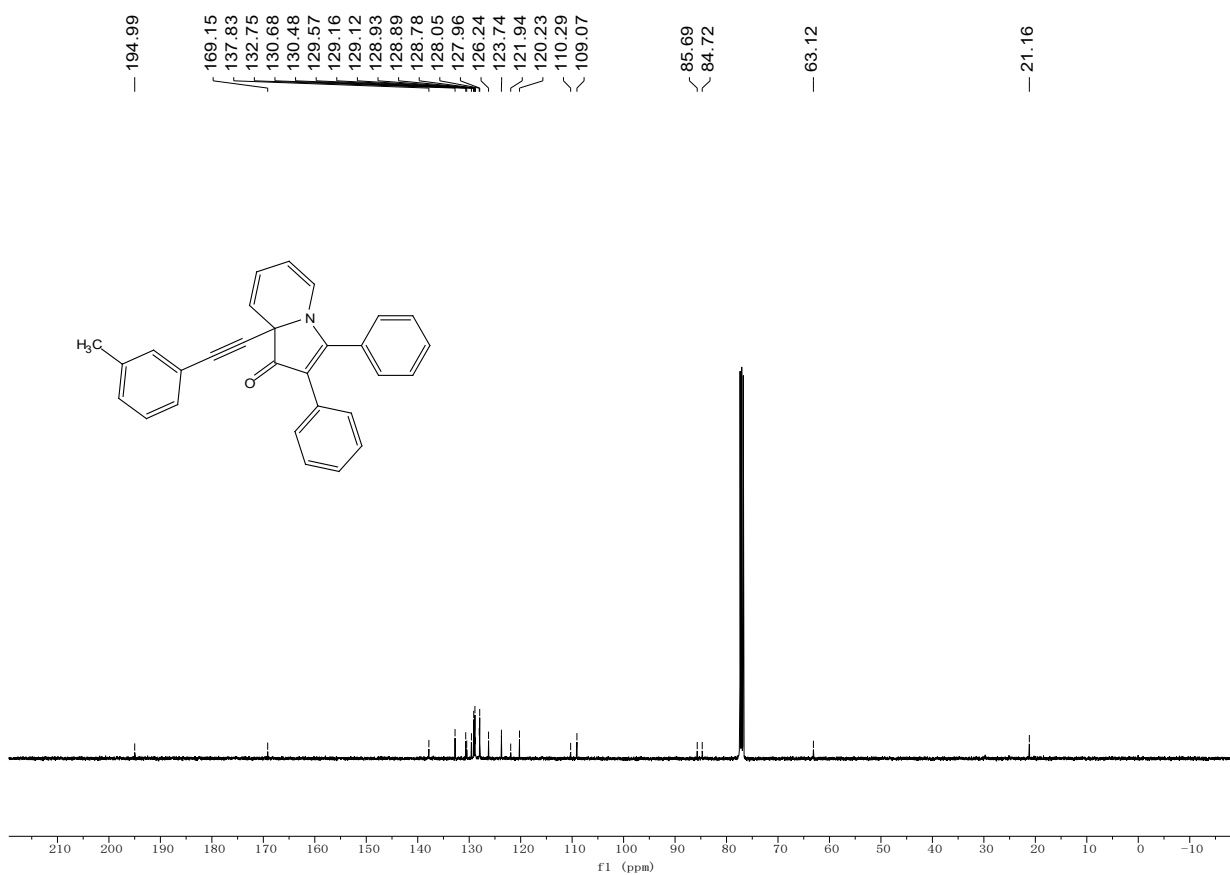

<sup>1</sup>H NMR (400 MHz, CDCl<sub>3</sub>) and <sup>13</sup>C NMR (100 MHz, CDCl<sub>3</sub>) spectrum of compound **3f**

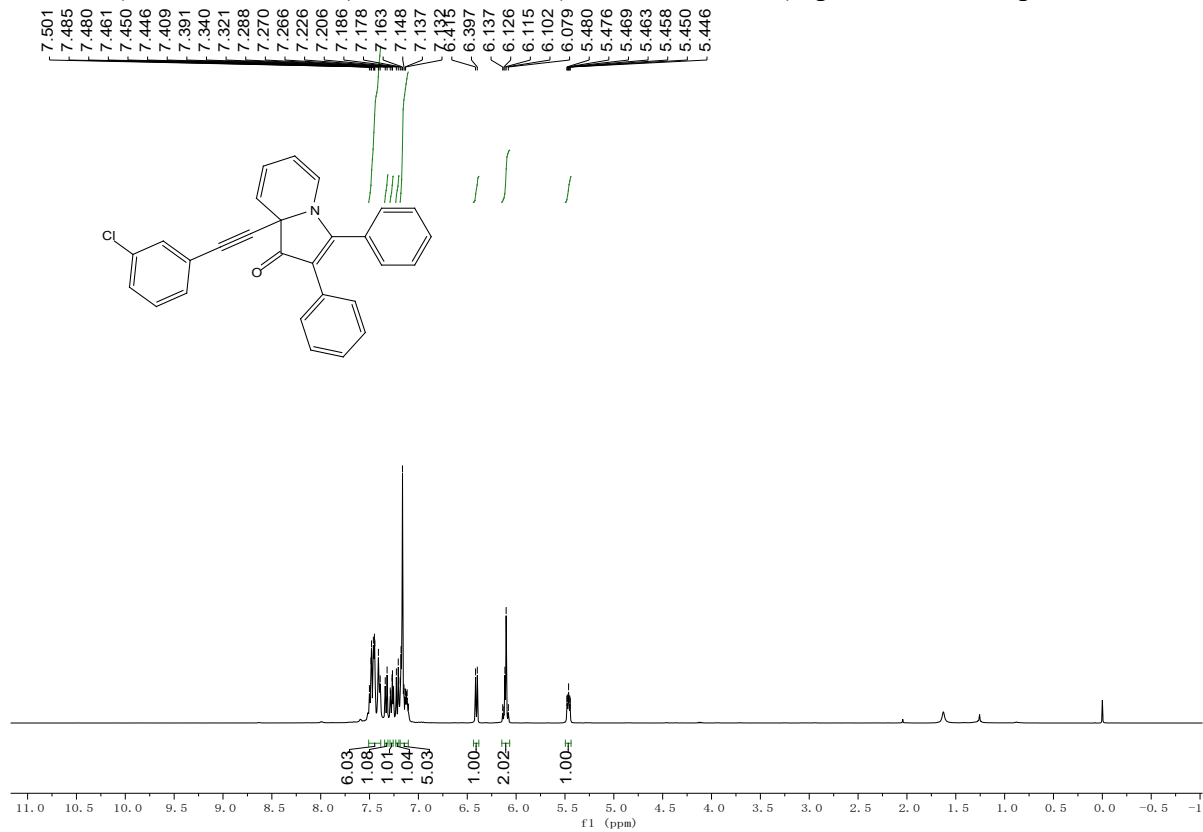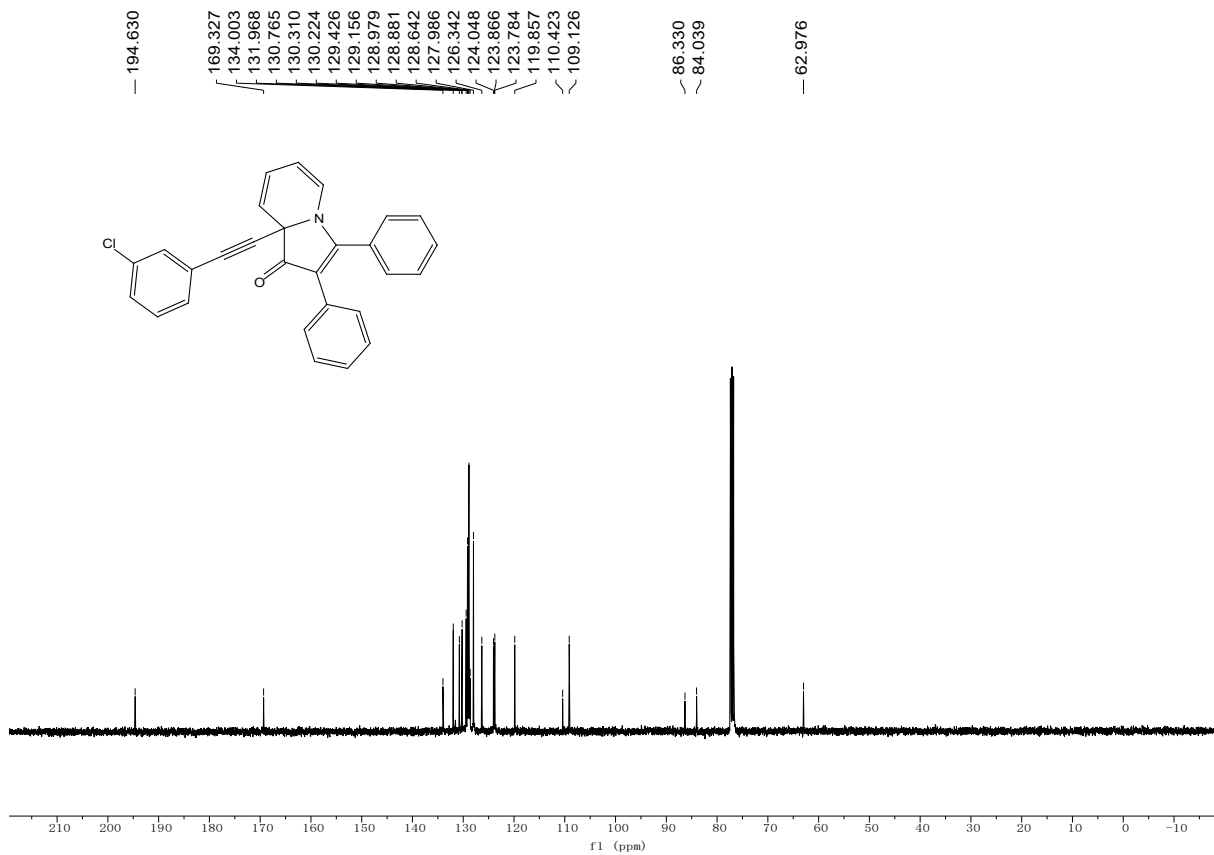

$^1\text{H}$  NMR (400 MHz,  $\text{CDCl}_3$ ) and  $^{13}\text{C}$  NMR (100 MHz,  $\text{CDCl}_3$ ) spectrum of compound **3g**

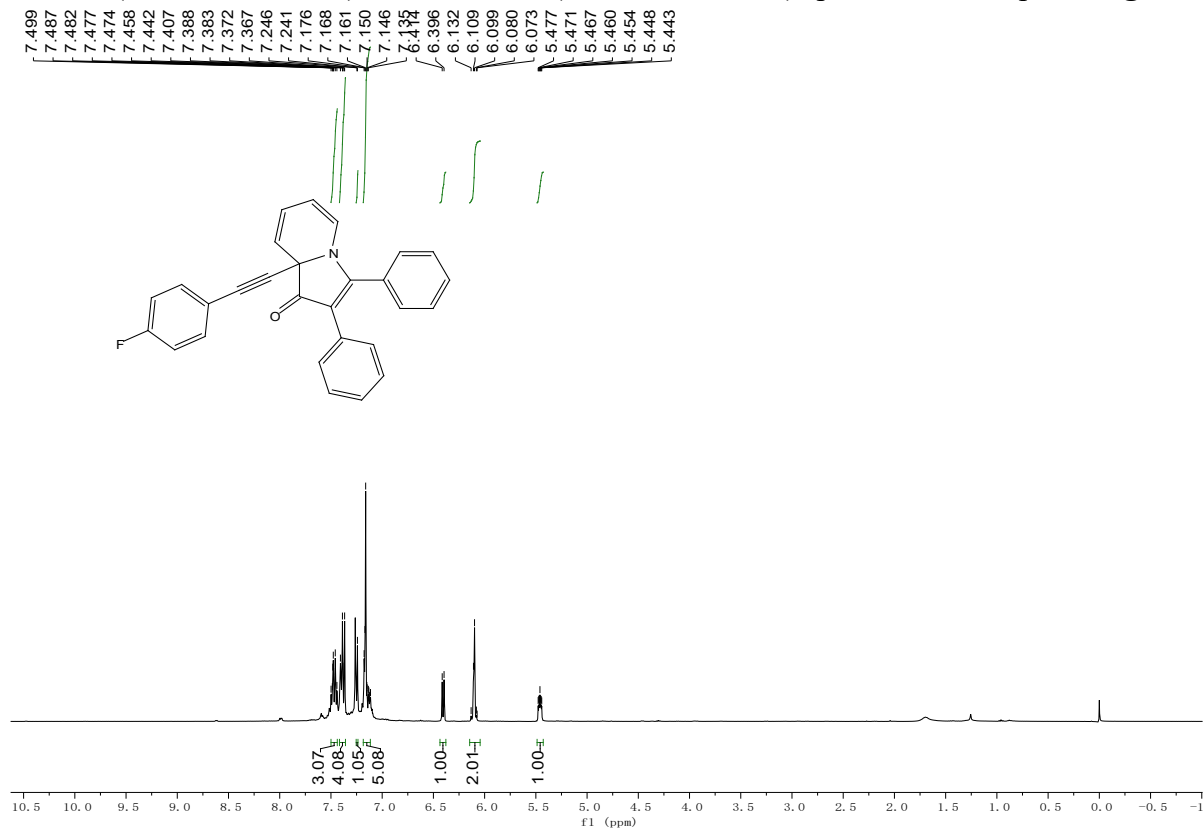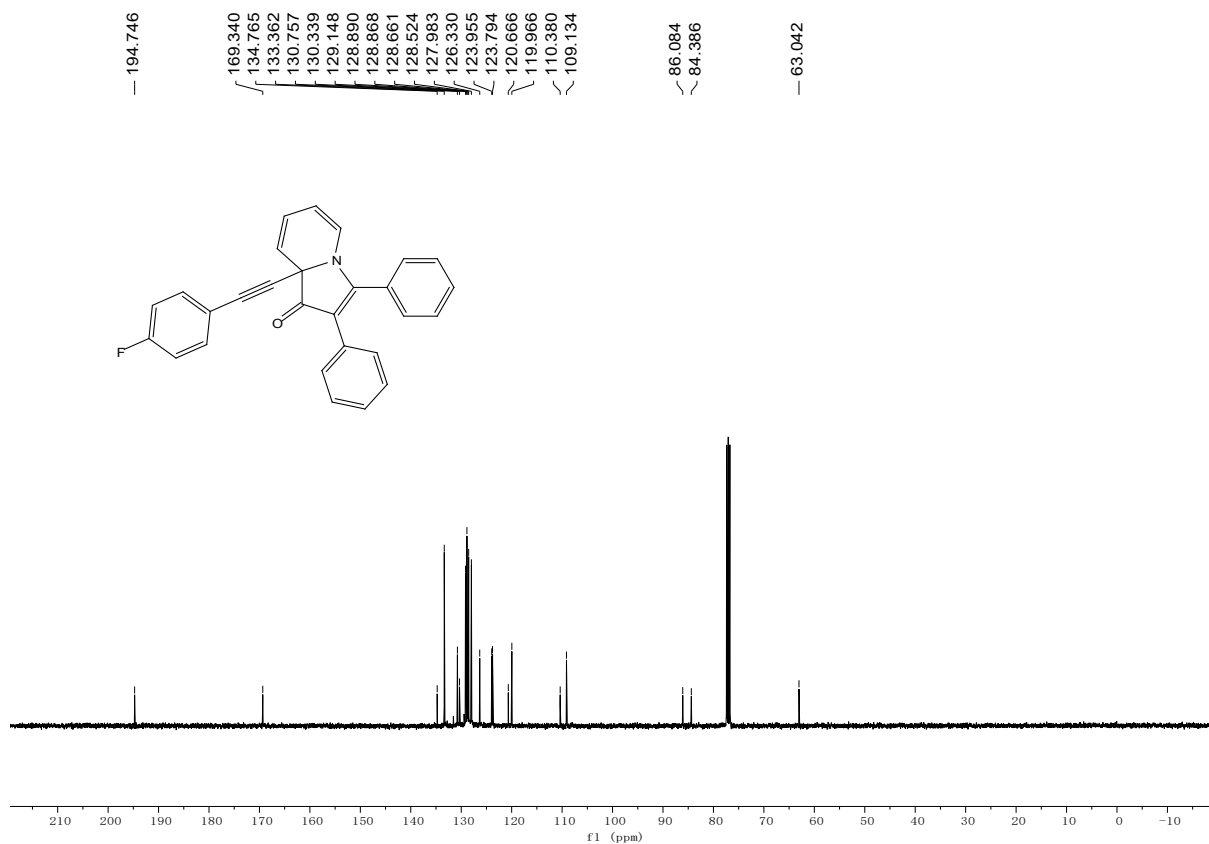



$^1\text{H}$  NMR (400 MHz,  $\text{CDCl}_3$ ) and  $^{13}\text{C}$  NMR (100 MHz,  $\text{CDCl}_3$ ) spectrum of compound **3h**

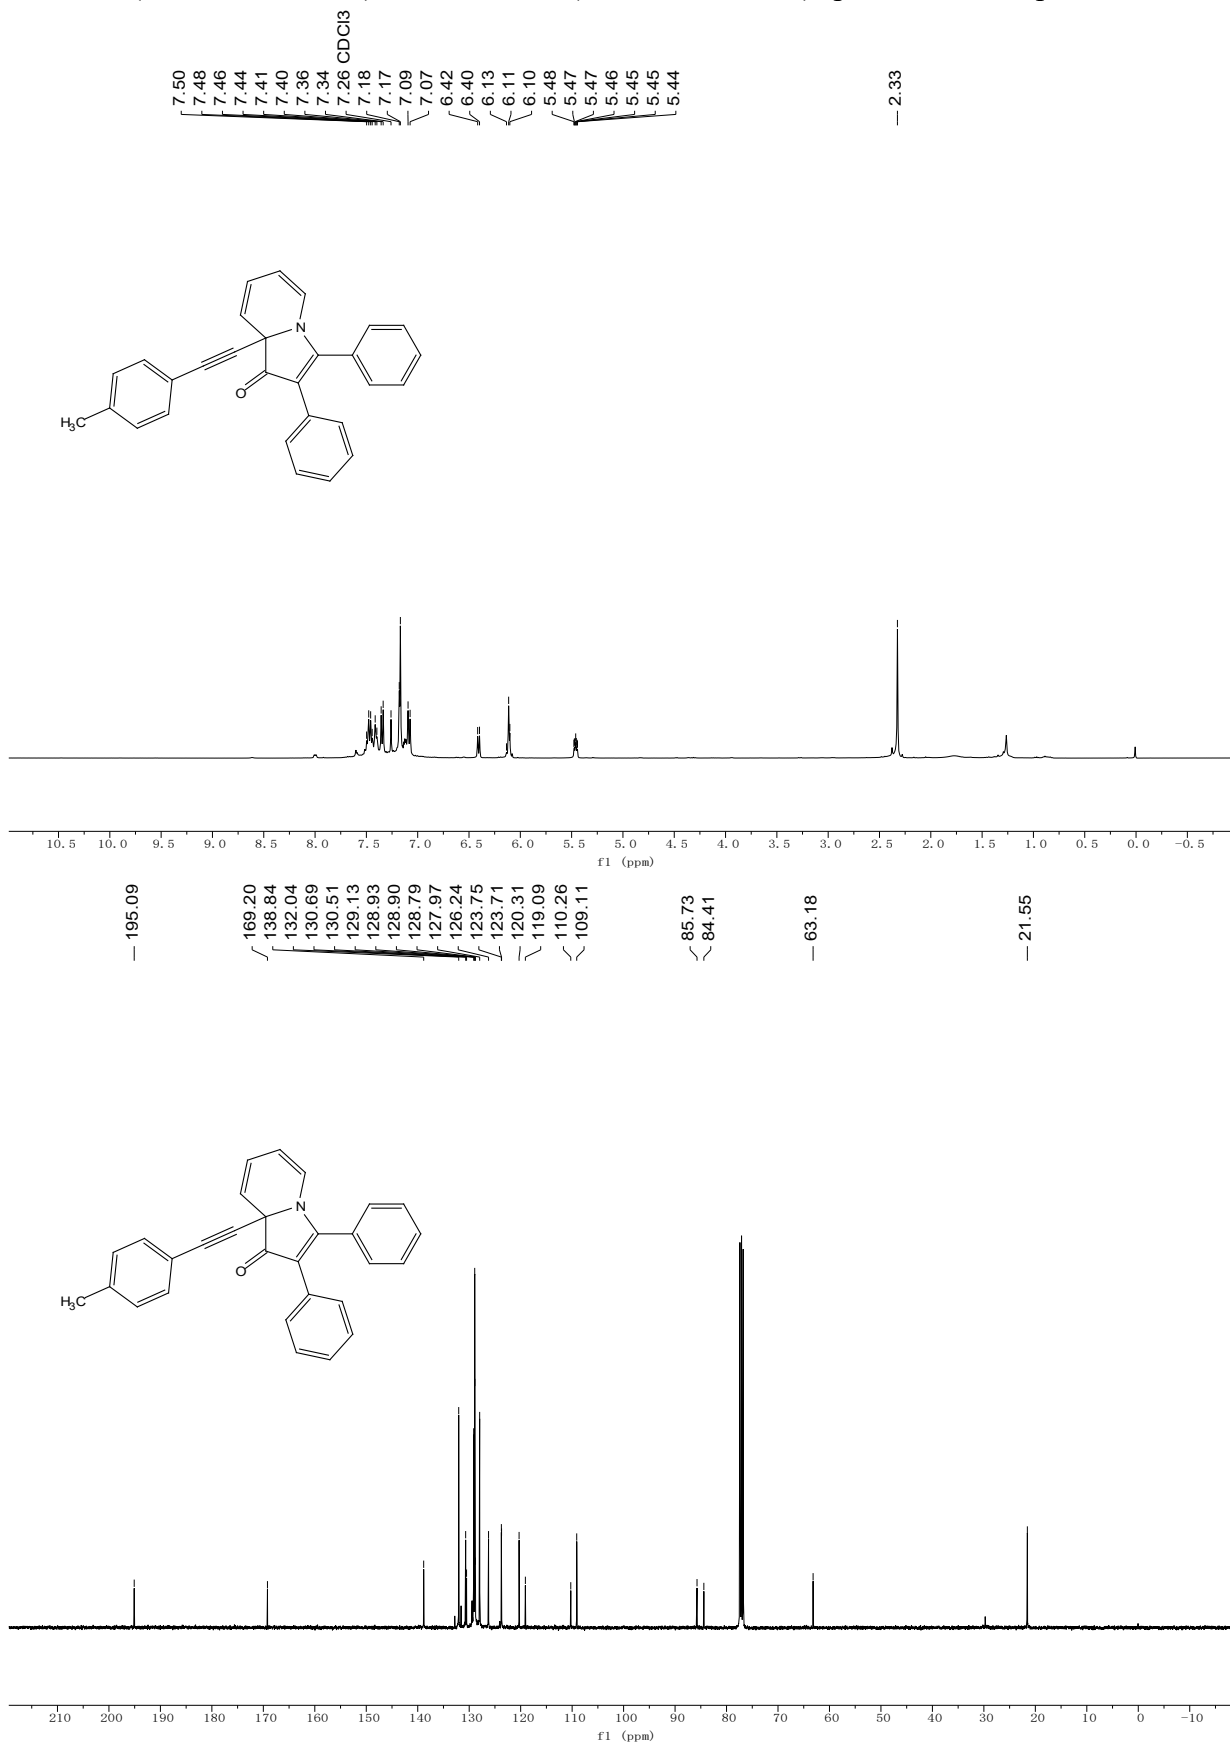

$^1\text{H}$  NMR (400 MHz,  $\text{CDCl}_3$ ) and  $^{13}\text{C}$  NMR (100 MHz,  $\text{CDCl}_3$ ) spectrum of compound **3i**

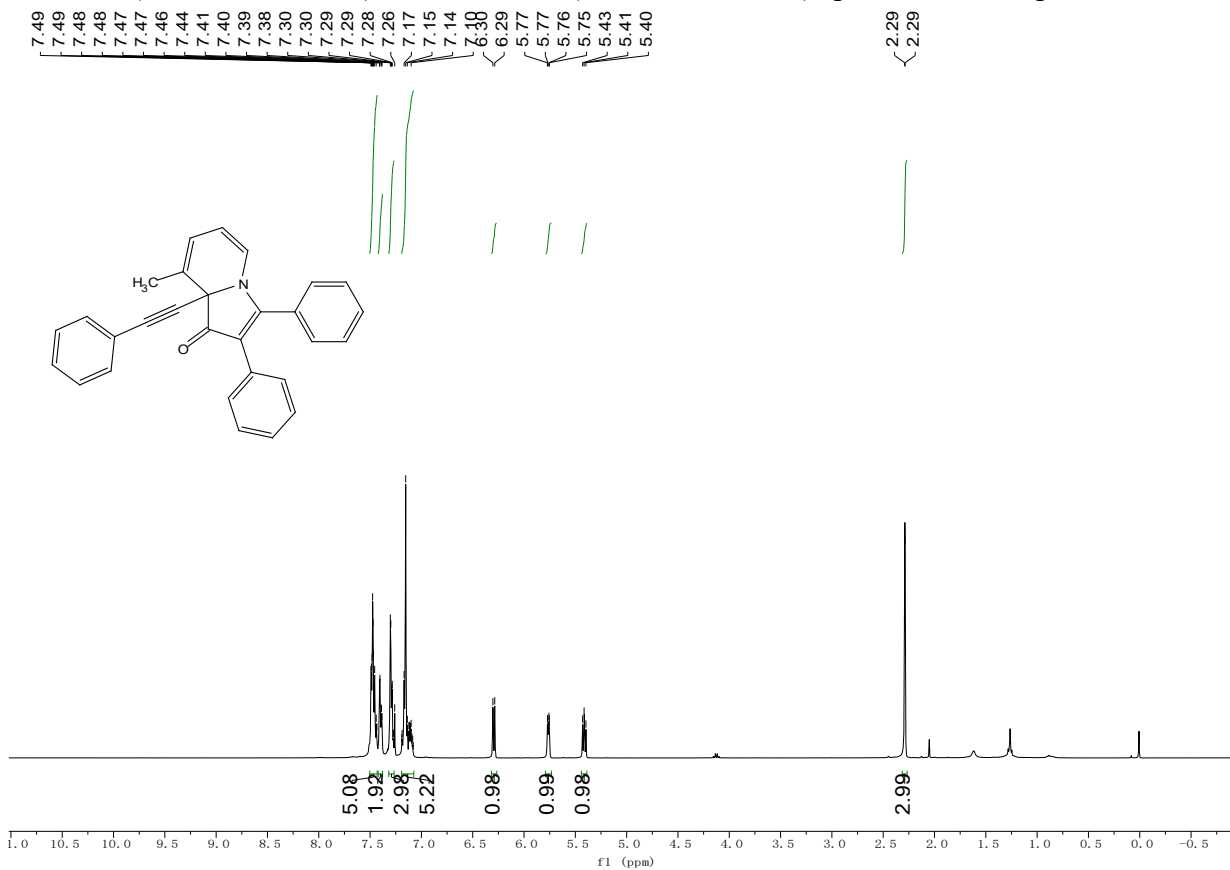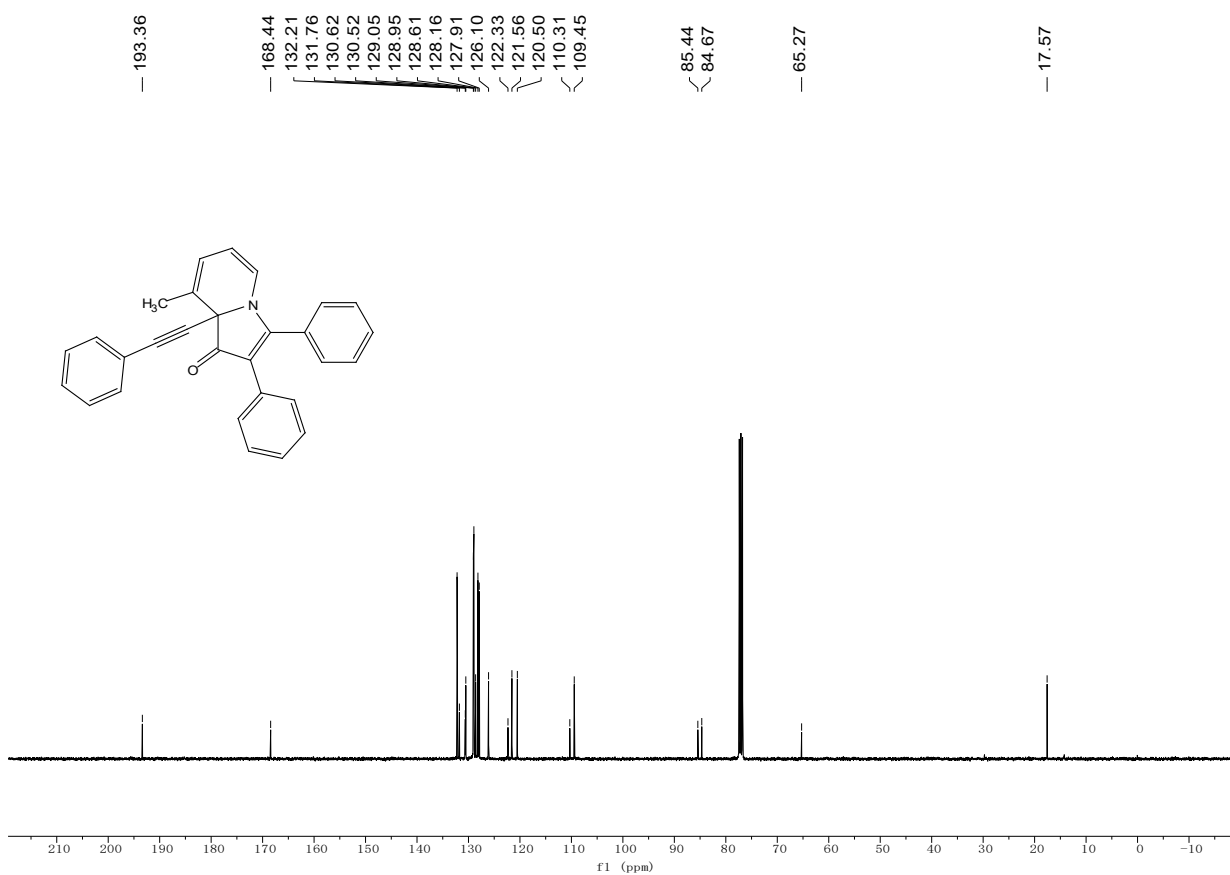

$^1\text{H}$  NMR (400 MHz,  $\text{CDCl}_3$ ) and  $^{13}\text{C}$  NMR (100 MHz,  $\text{CDCl}_3$ ) spectrum of compound **3j**

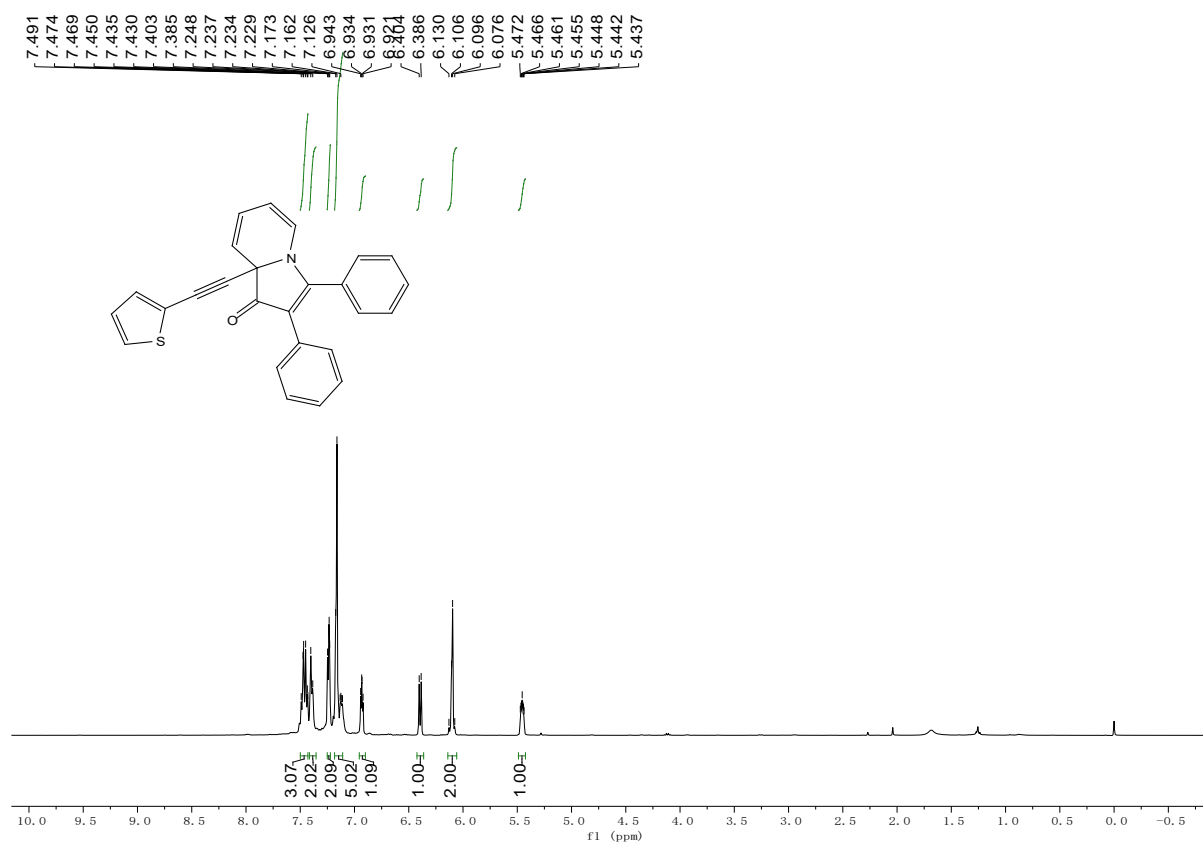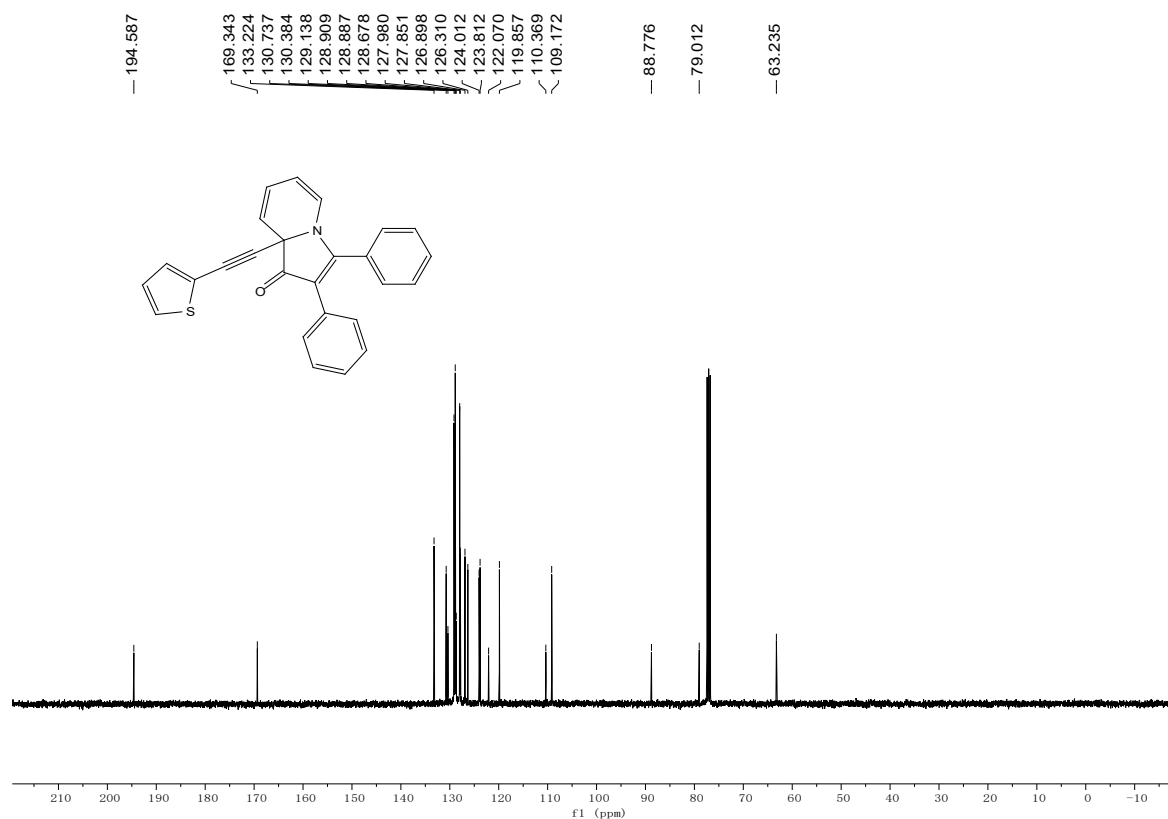

$^1\text{H}$  NMR (400 MHz,  $\text{CDCl}_3$ ) and  $^{13}\text{C}$  NMR (100 MHz,  $\text{CDCl}_3$ ) spectrum of compound **3k**

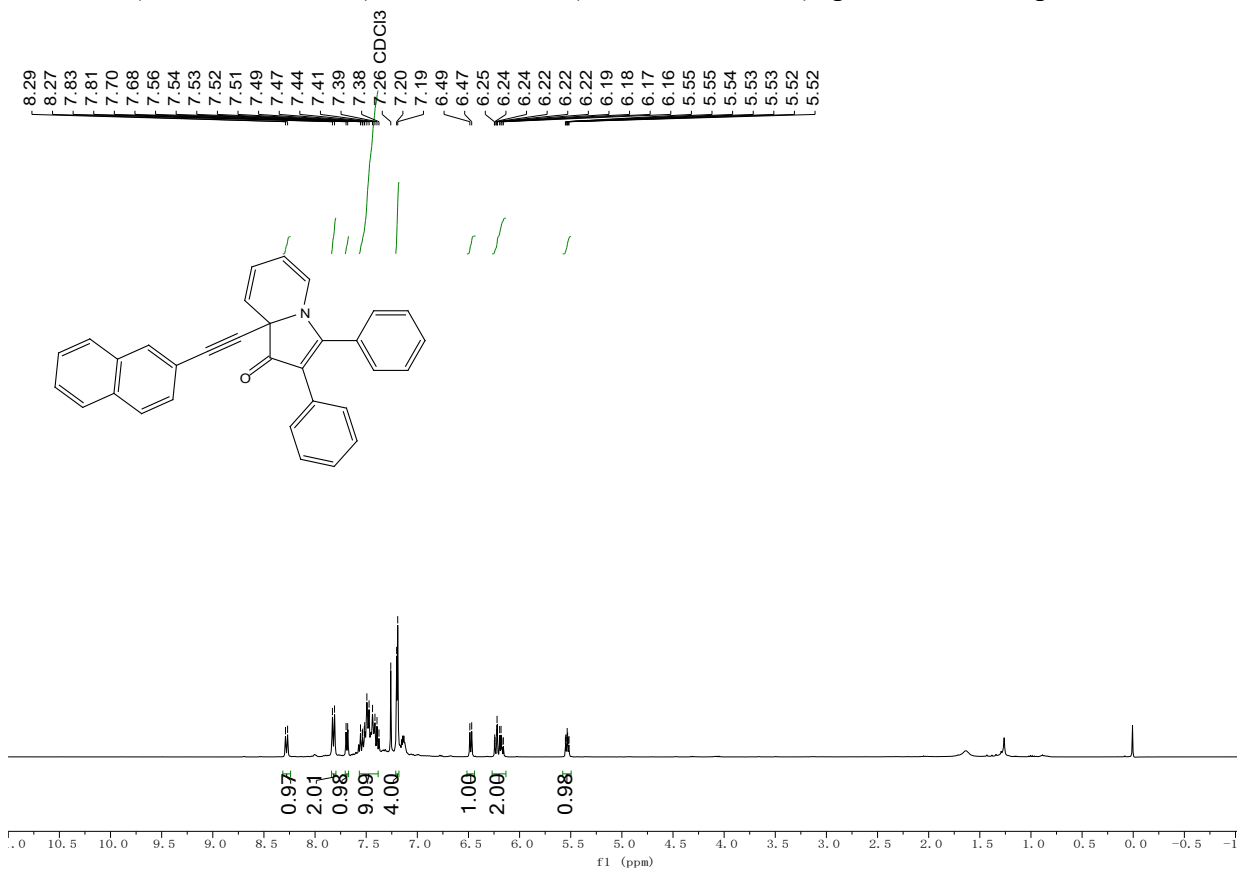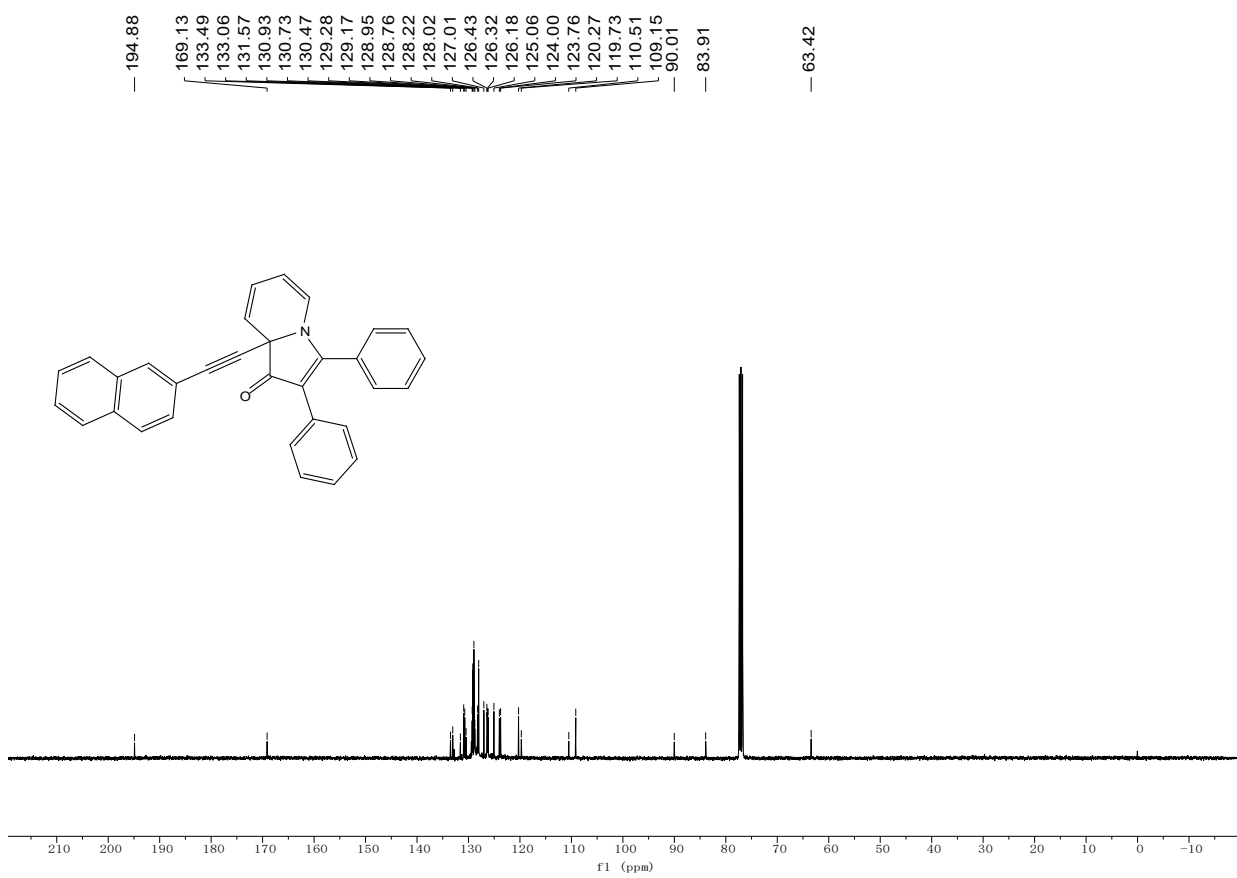

$^1\text{H}$  NMR (400 MHz,  $\text{CDCl}_3$ ) and  $^{13}\text{C}$  NMR (100 MHz,  $\text{CDCl}_3$ ) spectrum of compound **31**

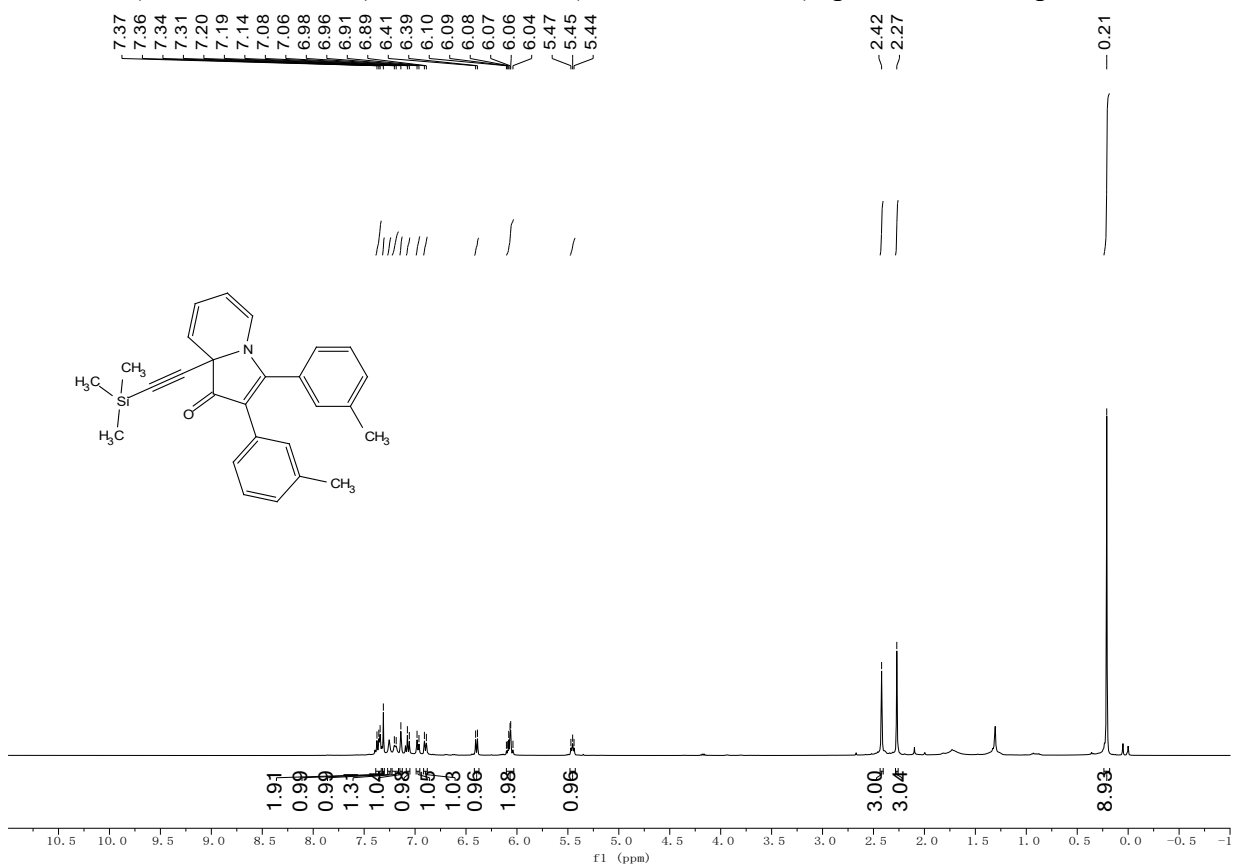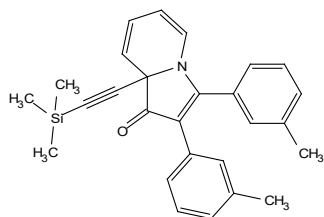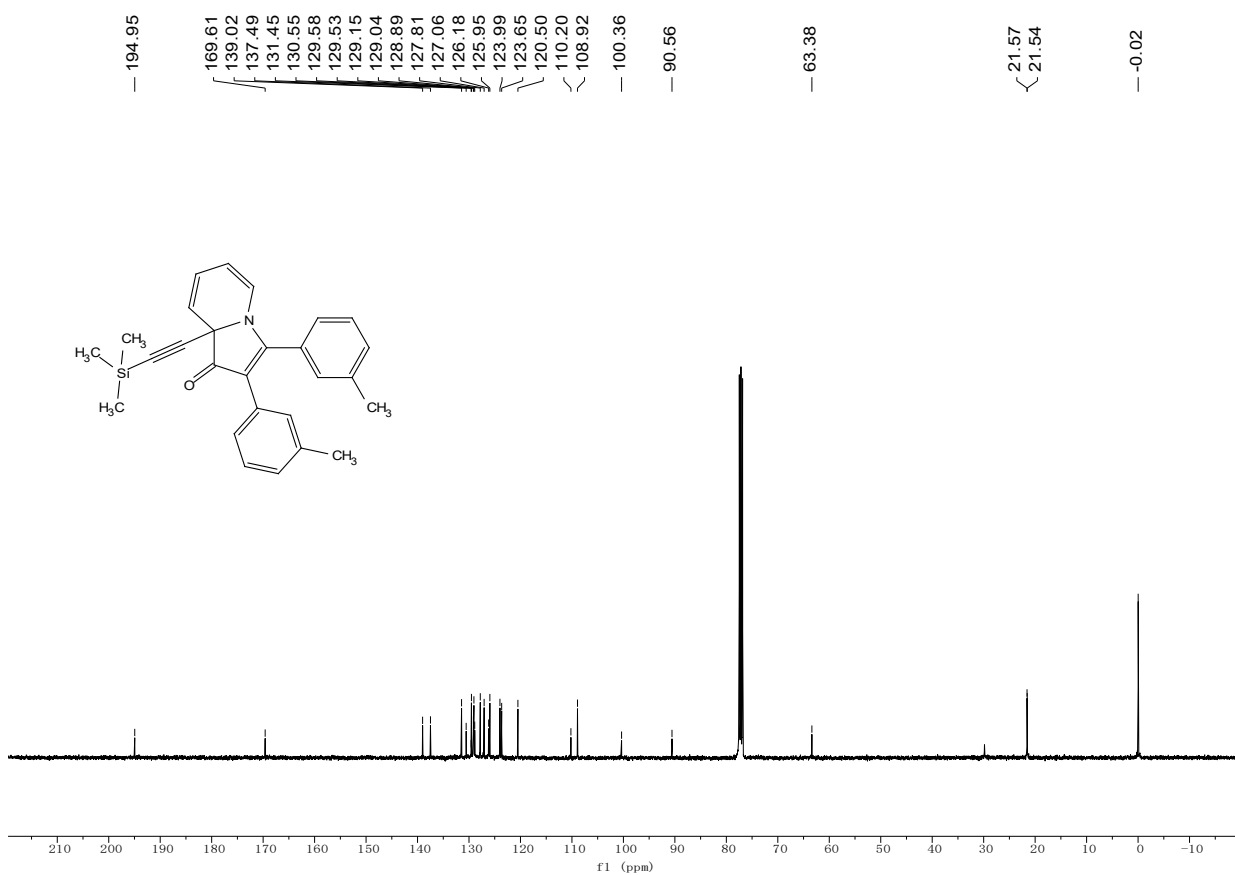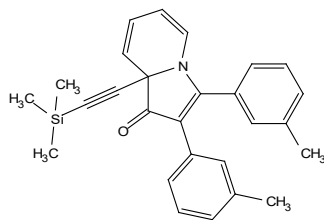

<sup>1</sup>H NMR (400 MHz, CDCl<sub>3</sub>) and <sup>13</sup>C NMR (100 MHz, CDCl<sub>3</sub>) spectrum of compound **3m**

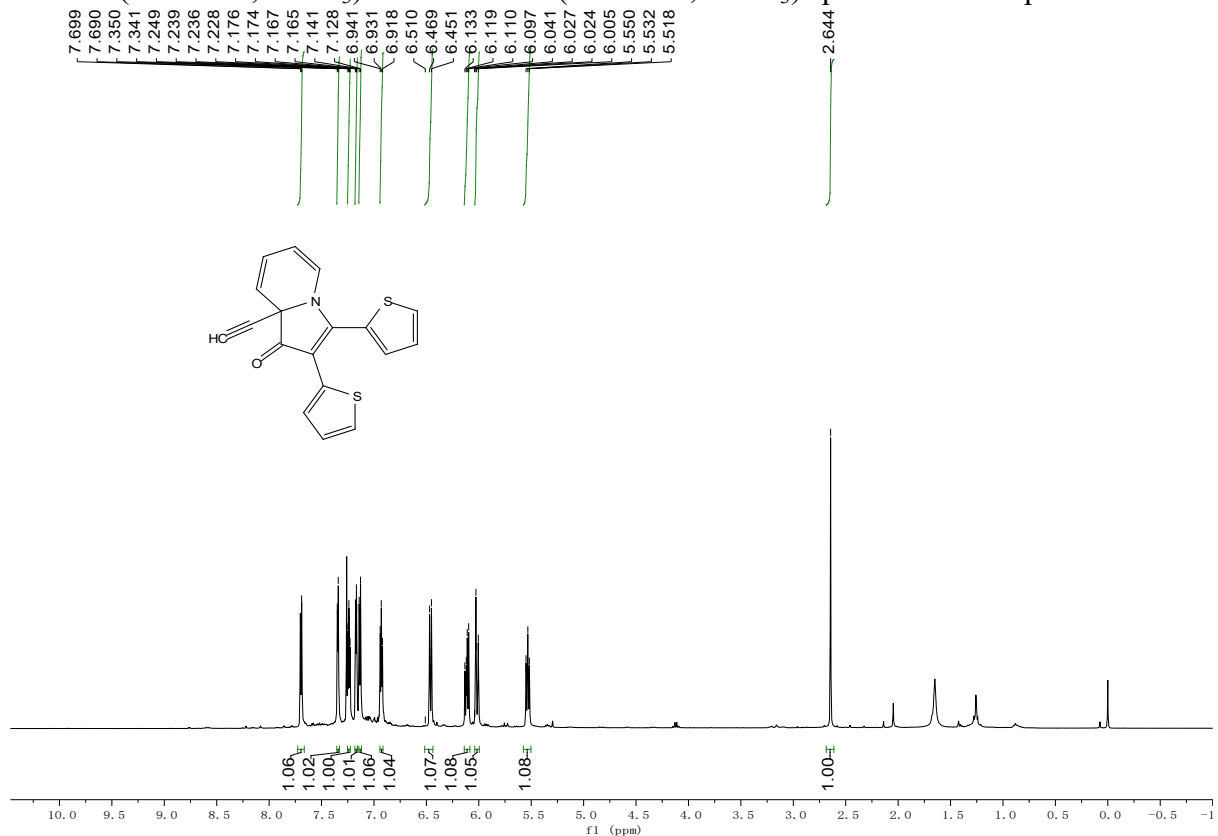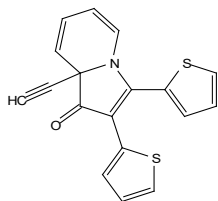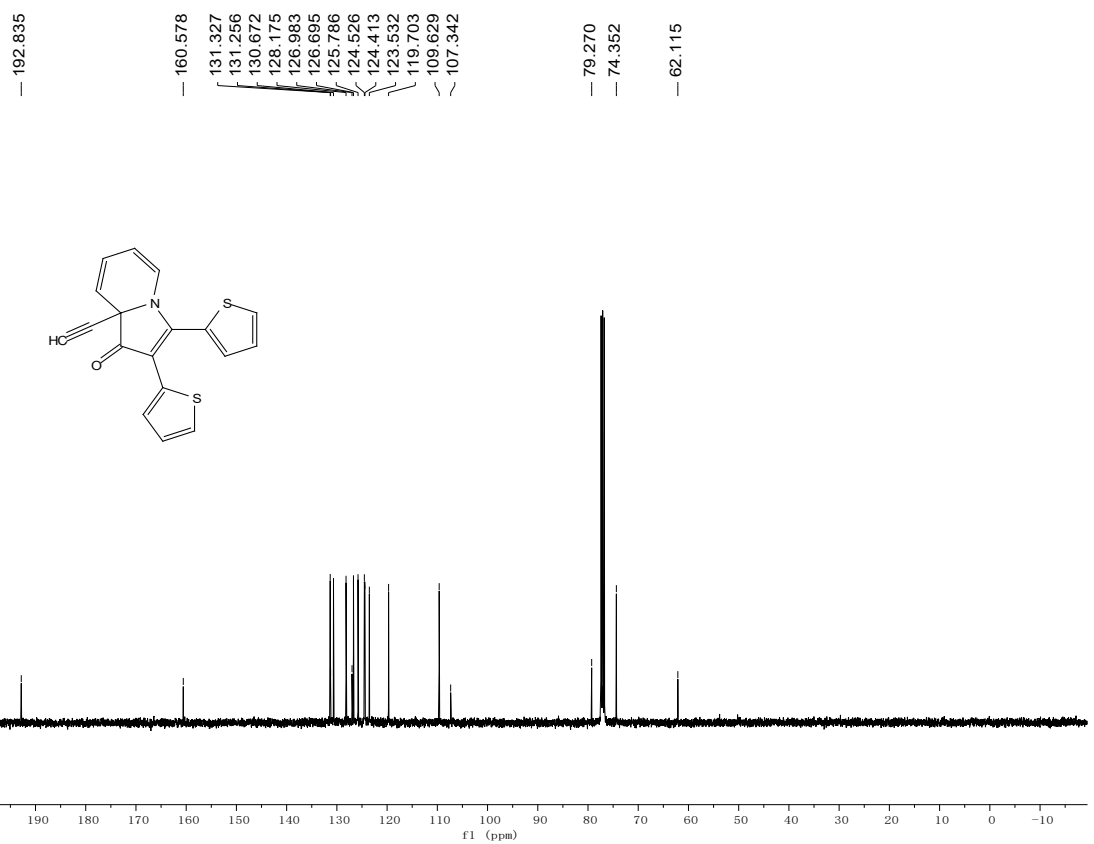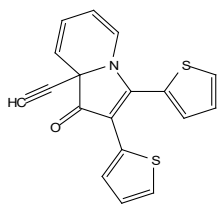

$^1\text{H}$  NMR (400 MHz,  $\text{CDCl}_3$ ) and  $^{13}\text{C}$  NMR (100 MHz,  $\text{CDCl}_3$ ) spectrum of compound **3n**

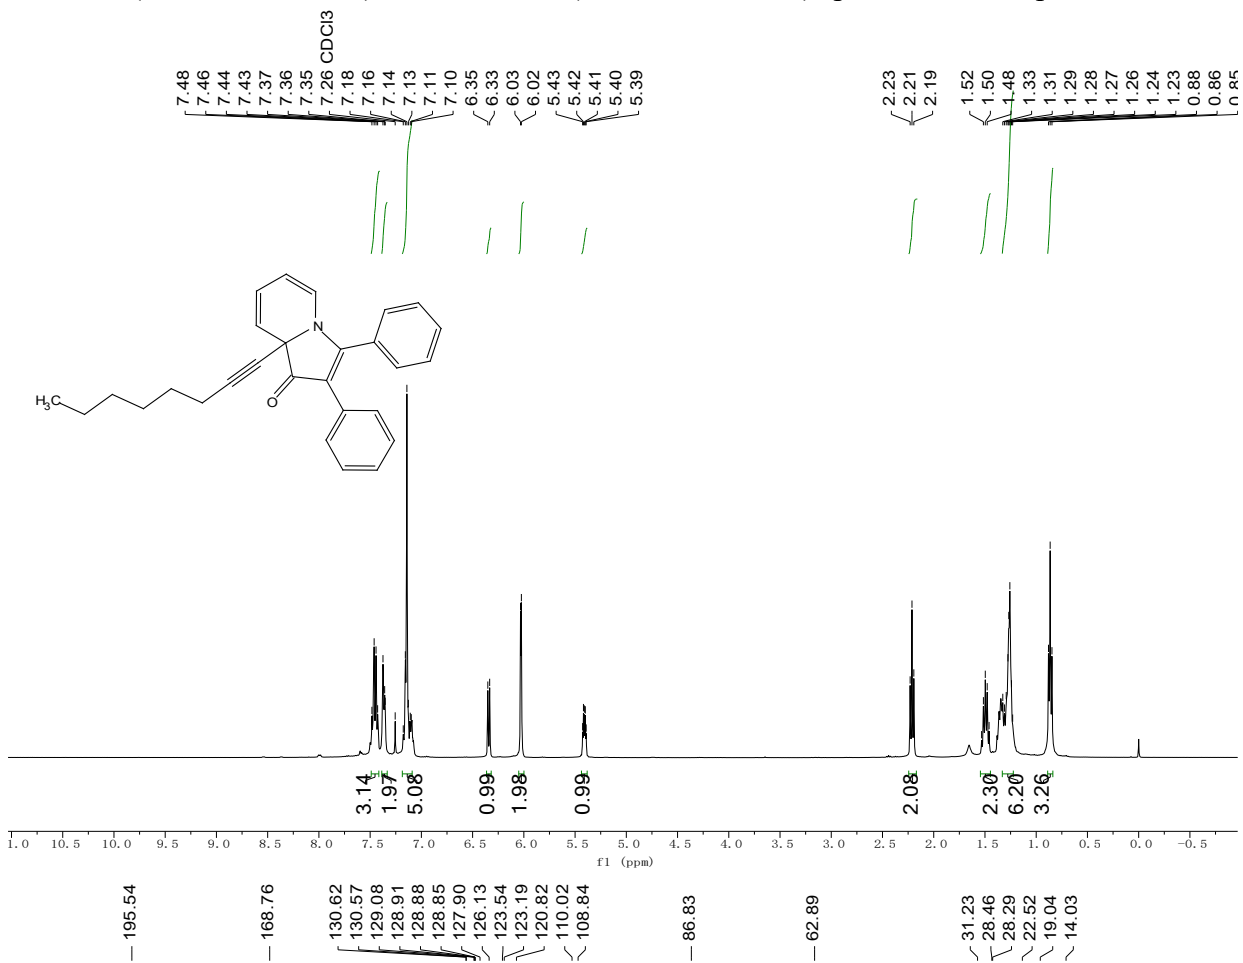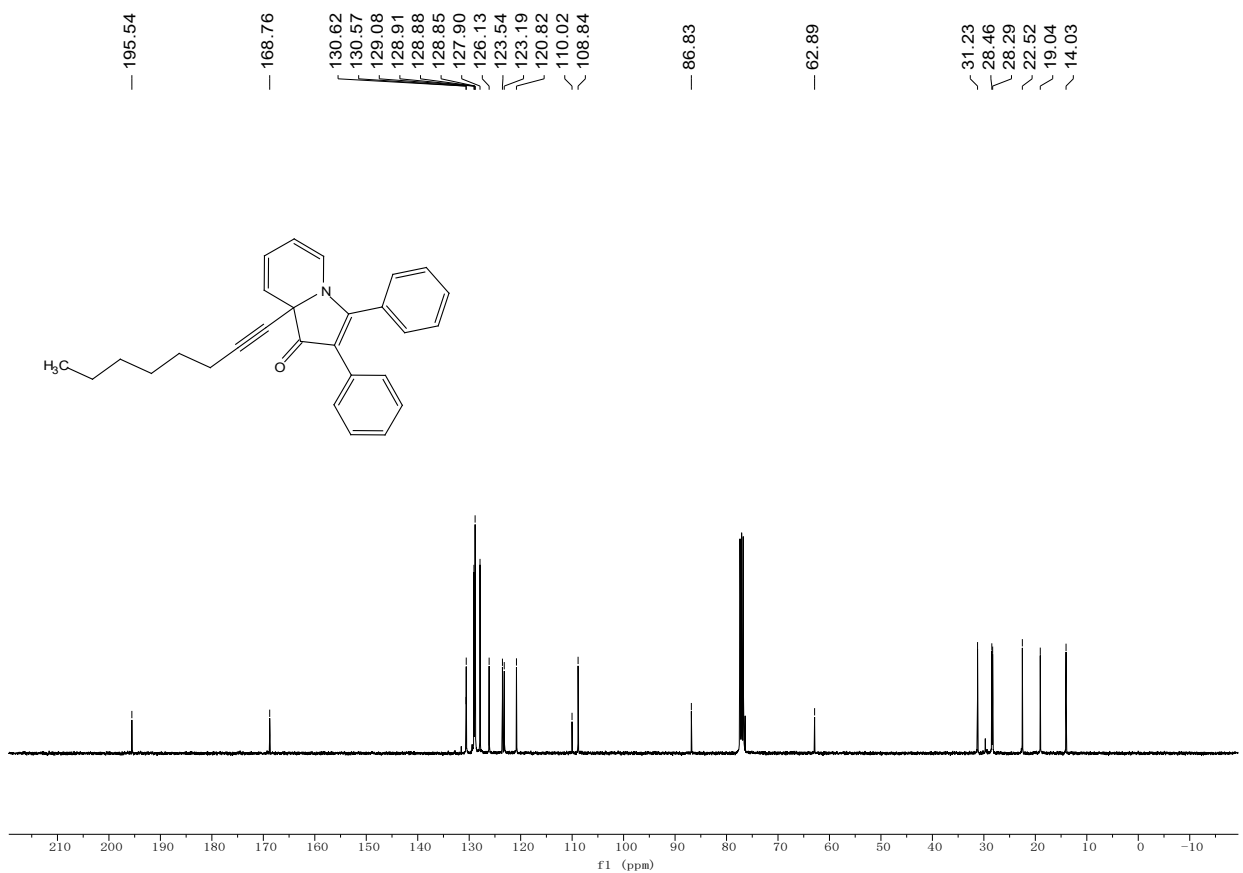

$^1\text{H}$  NMR (400 MHz,  $\text{CDCl}_3$ ) and  $^{13}\text{C}$  NMR (100 MHz,  $\text{CDCl}_3$ ) spectrum of compound **4a**

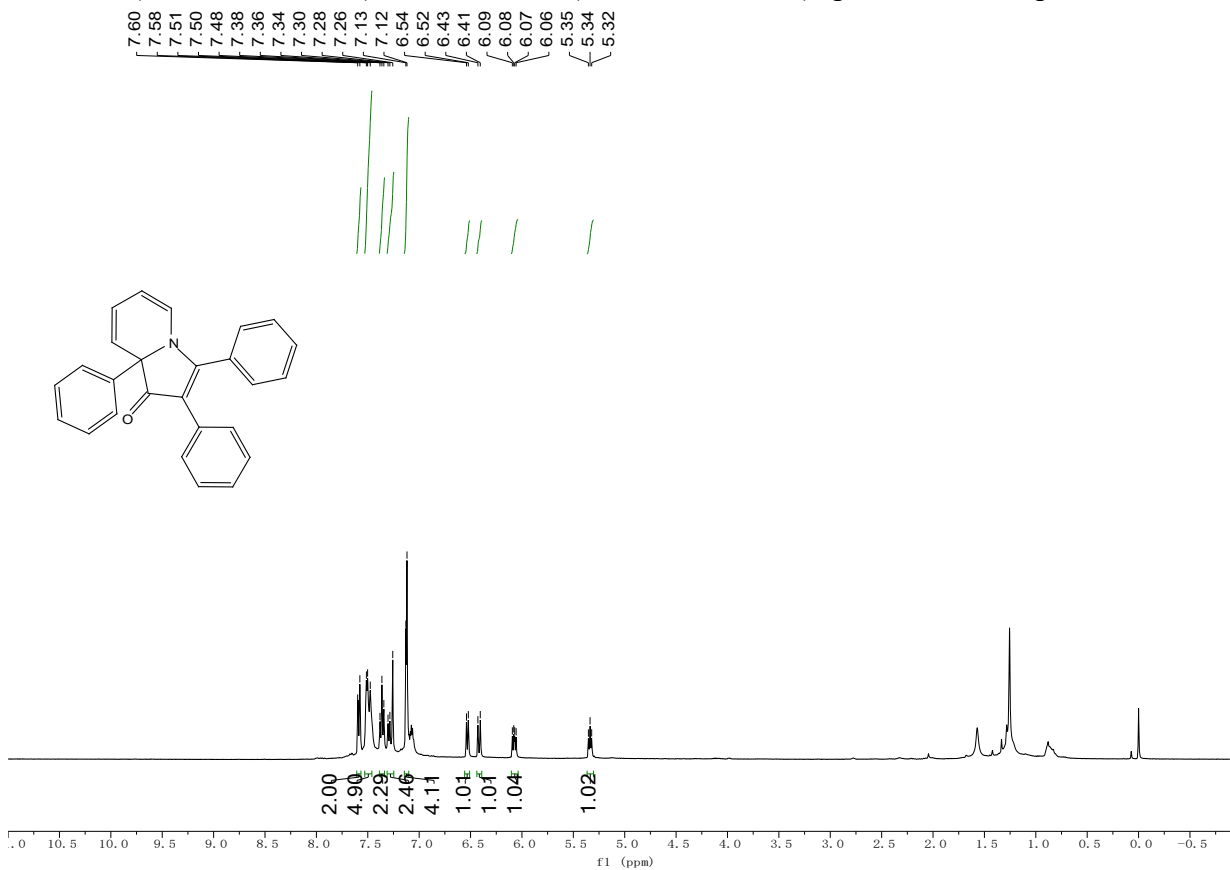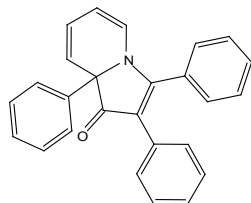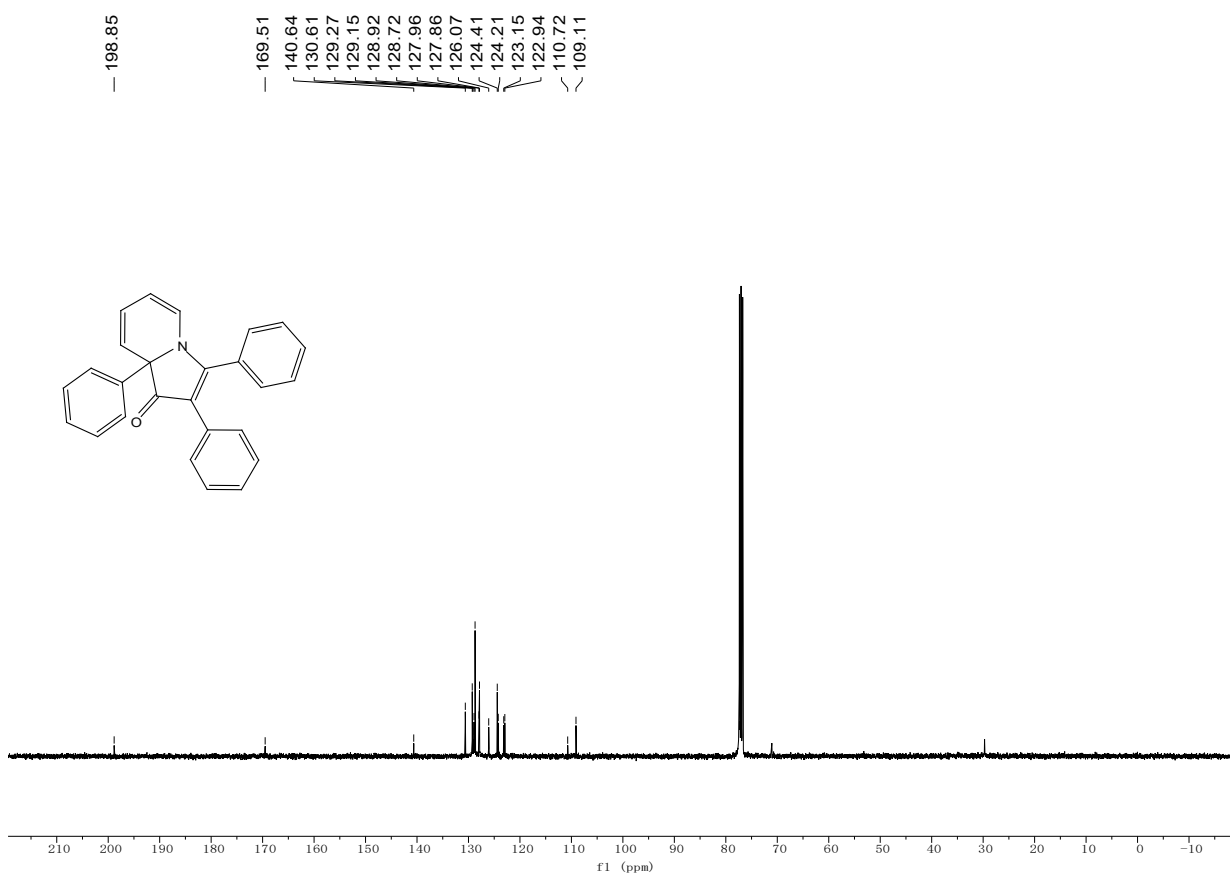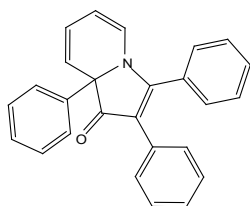



$^1\text{H}$  NMR (400 MHz,  $\text{CDCl}_3$ ) and  $^{13}\text{C}$  NMR (100 MHz,  $\text{CDCl}_3$ ) spectrum of compound **6a**

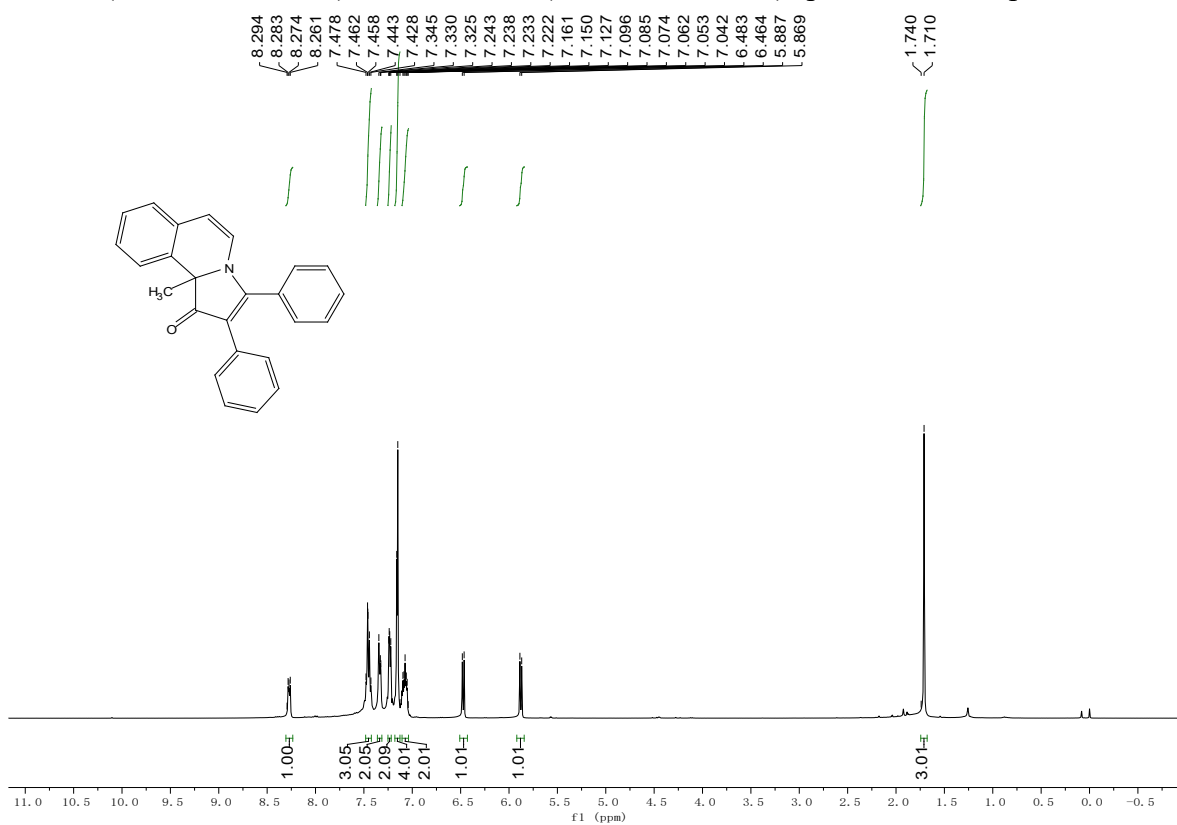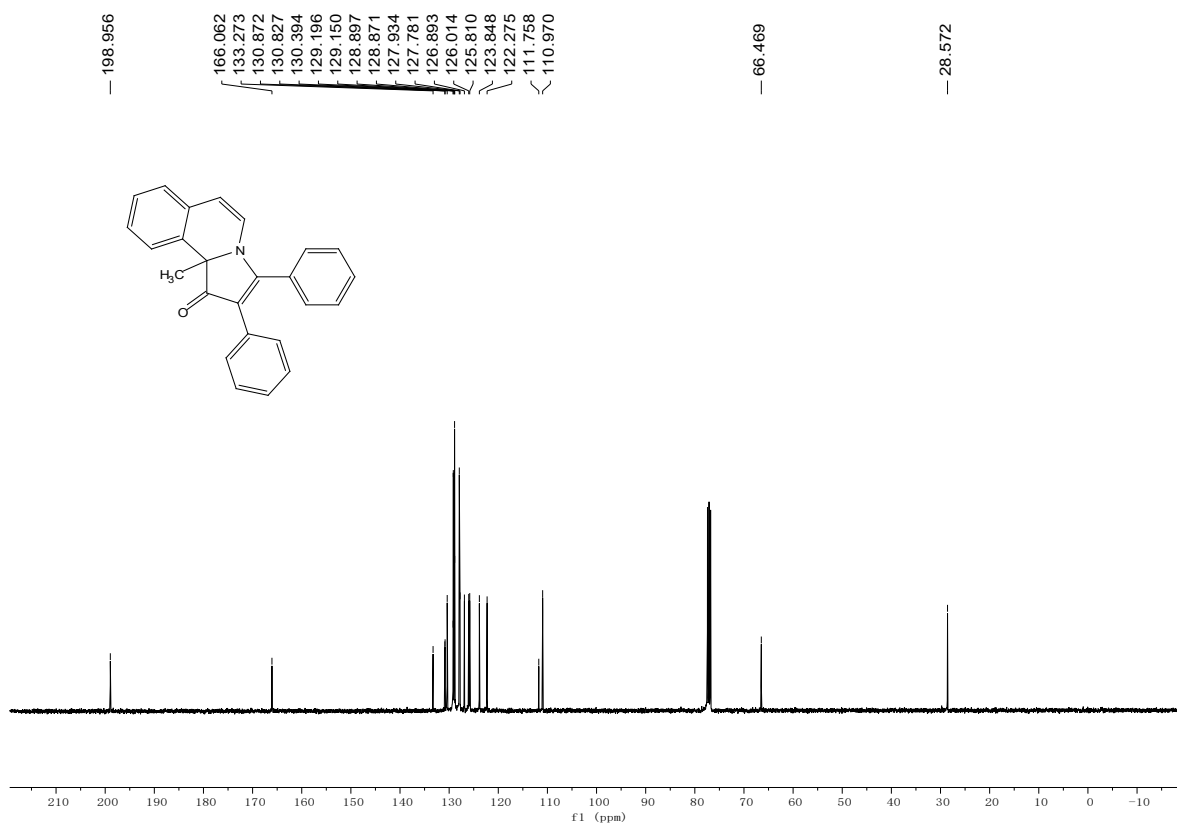

<sup>1</sup>H NMR (400 MHz, CDCl<sub>3</sub>) and <sup>13</sup>C NMR (100 MHz, CDCl<sub>3</sub>) spectrum of compound **6b**

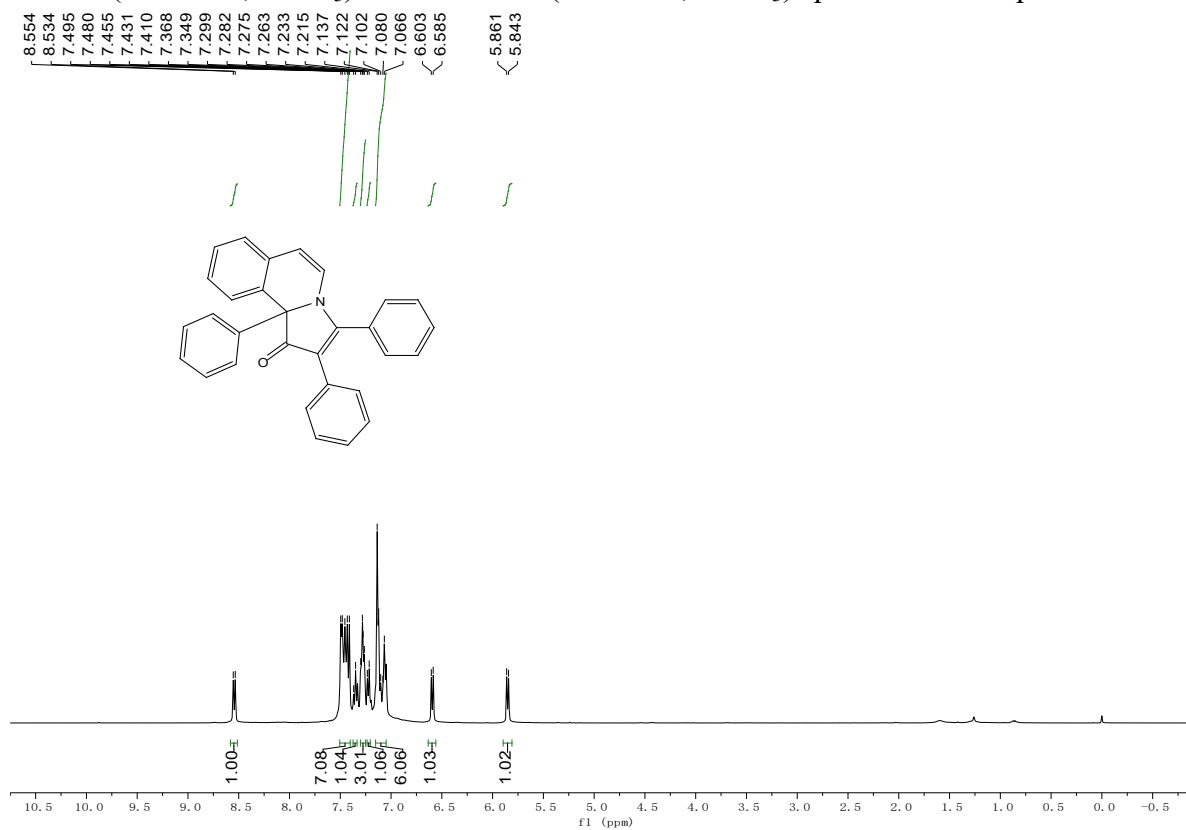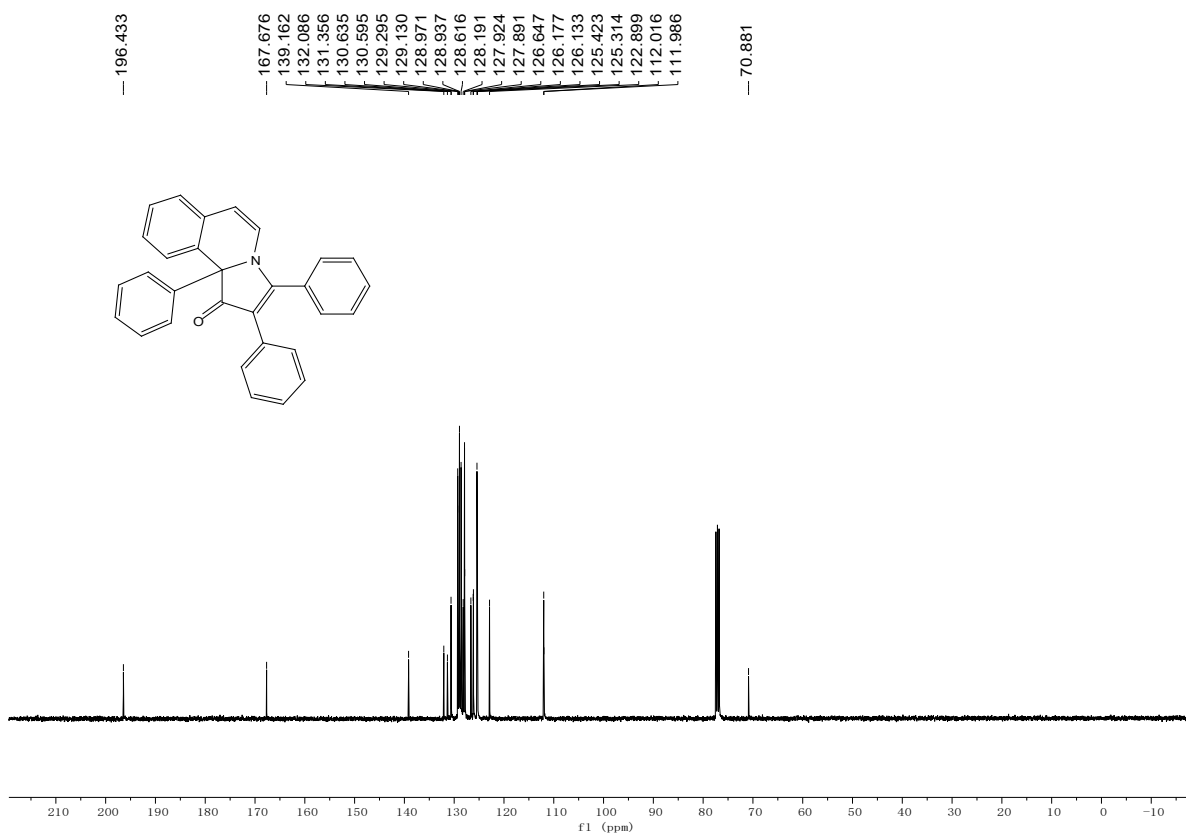

$^1\text{H}$  NMR (400 MHz,  $\text{CDCl}_3$ ) and  $^{13}\text{C}$  NMR (100 MHz,  $\text{CDCl}_3$ ) spectrum of compound **6c**

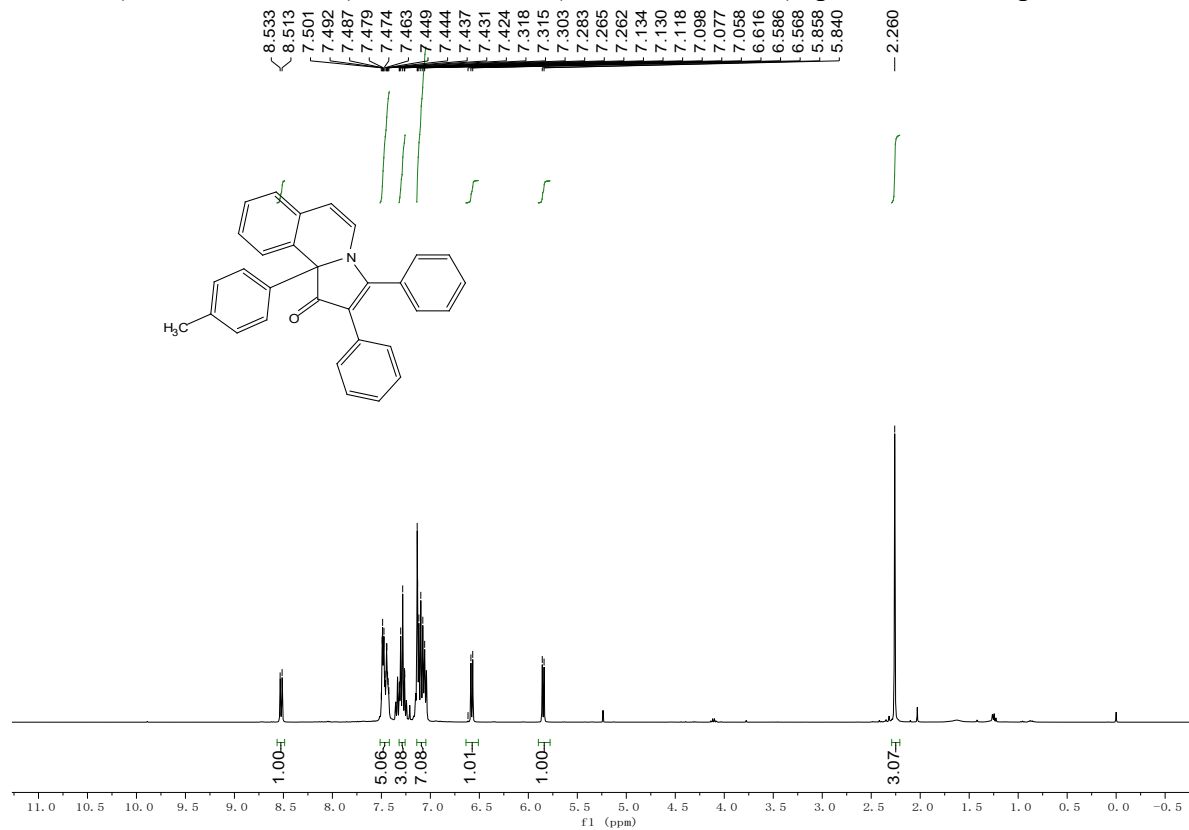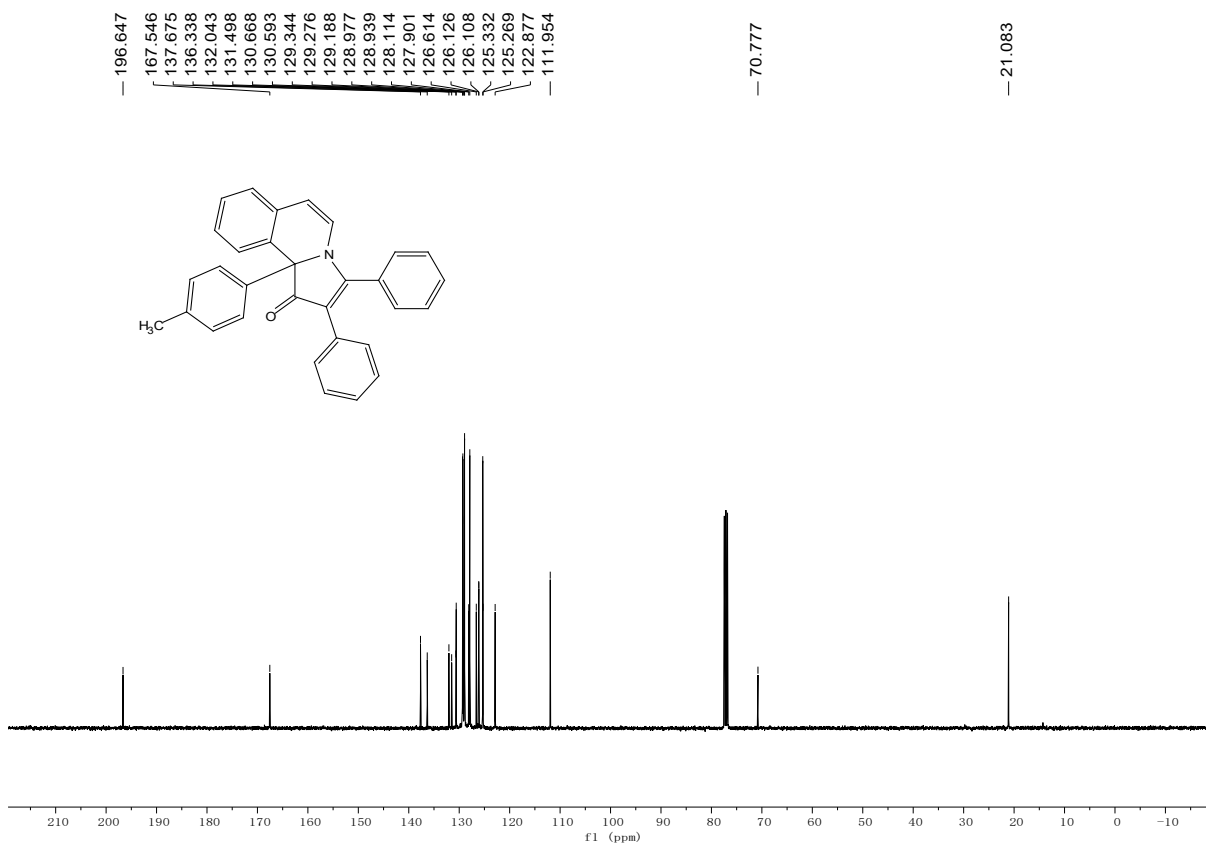

$^1\text{H}$  NMR (400 MHz,  $\text{CDCl}_3$ ) and  $^{13}\text{C}$  NMR (100 MHz,  $\text{CDCl}_3$ ) spectrum of compound **6d**

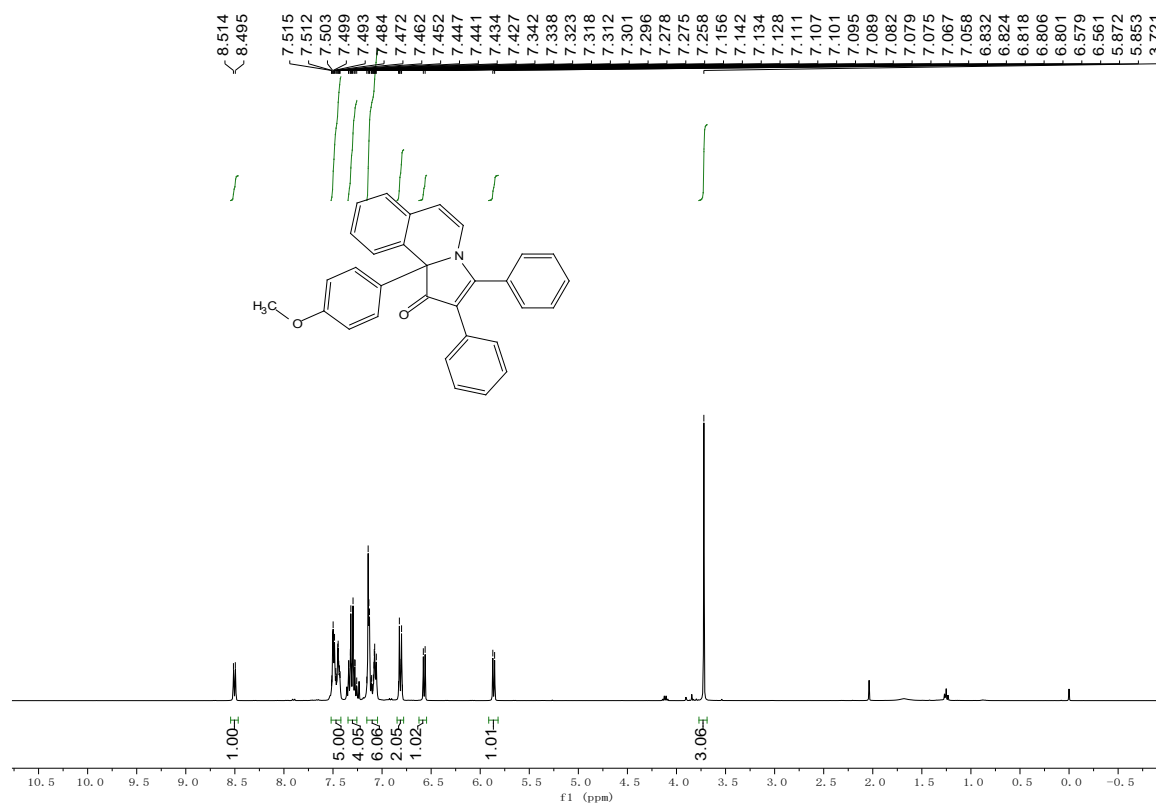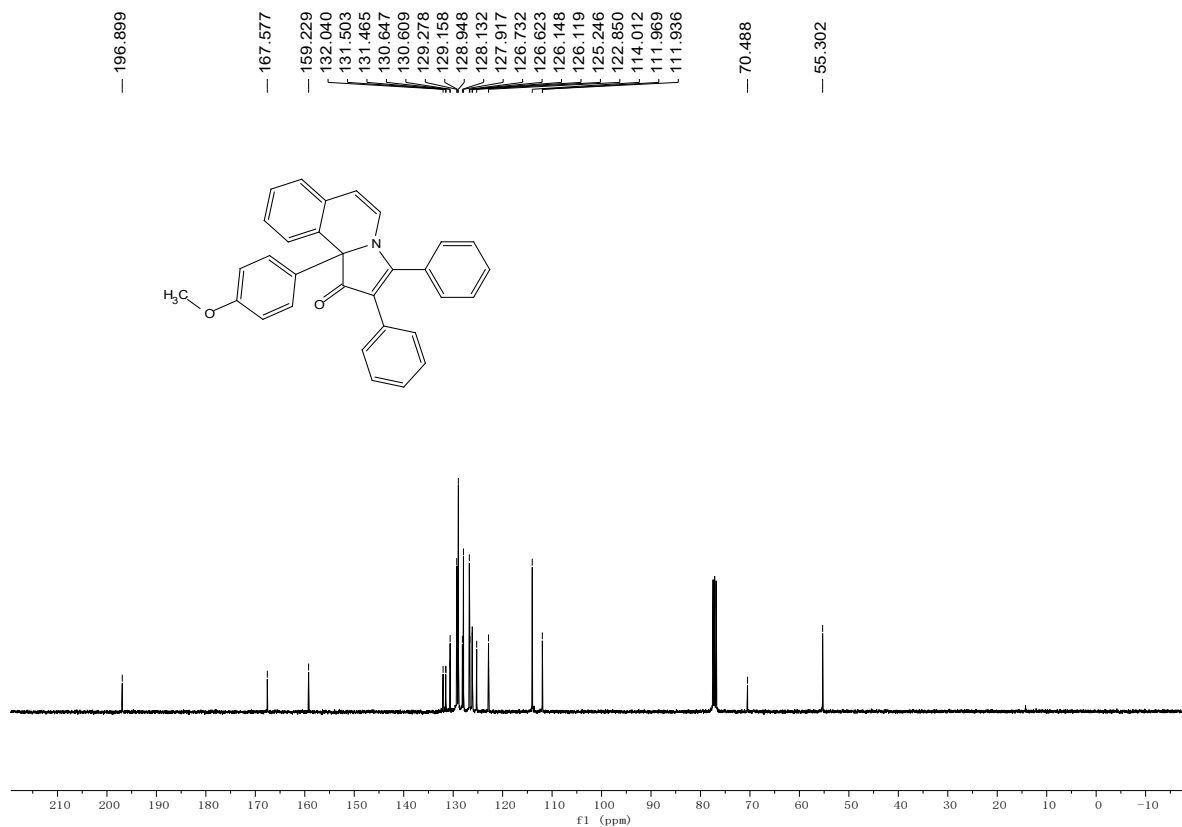

$^1\text{H}$  NMR (400 MHz,  $\text{CDCl}_3$ ) and  $^{13}\text{C}$  NMR (100 MHz,  $\text{CDCl}_3$ ) spectrum of compound **6e**

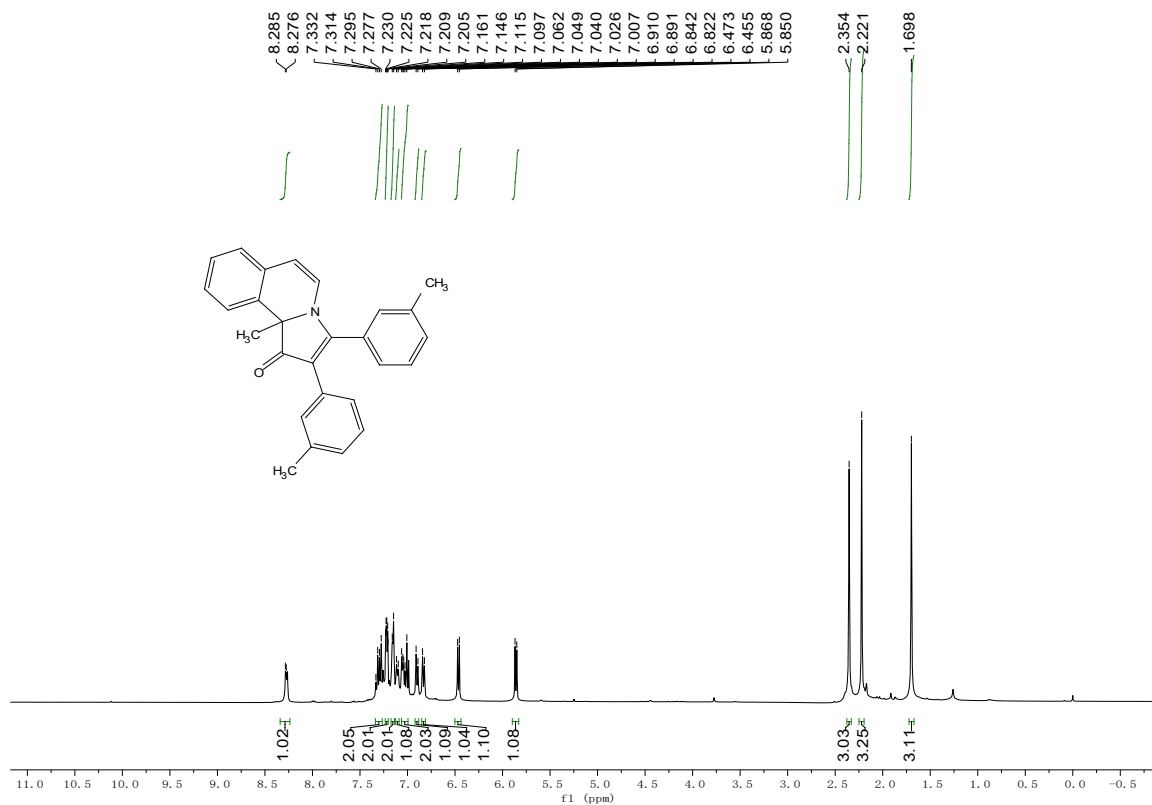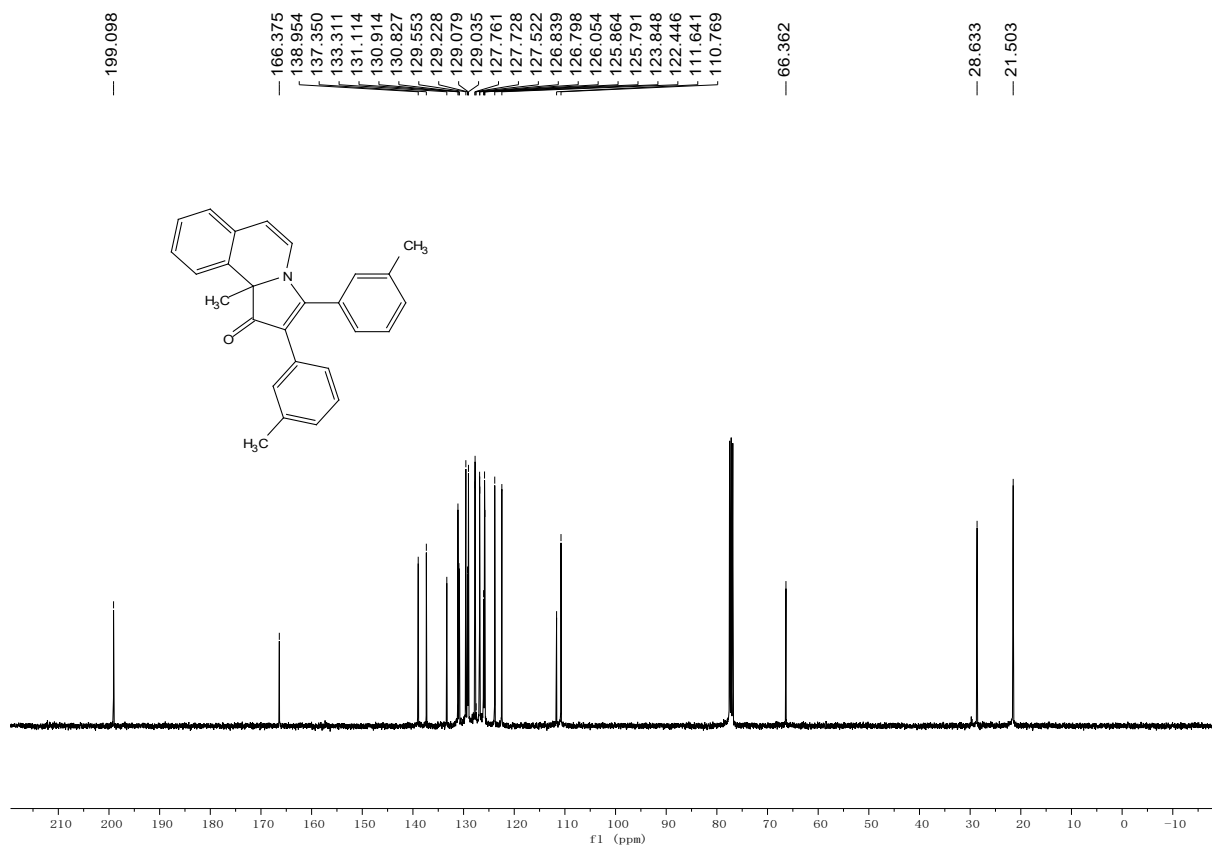

$^1\text{H}$  NMR (400 MHz,  $\text{CD}_2\text{Cl}_2$ ) and  $^{13}\text{C}$  NMR (100 MHz,  $\text{CD}_2\text{Cl}_2$ ) spectrum of compound **6f**

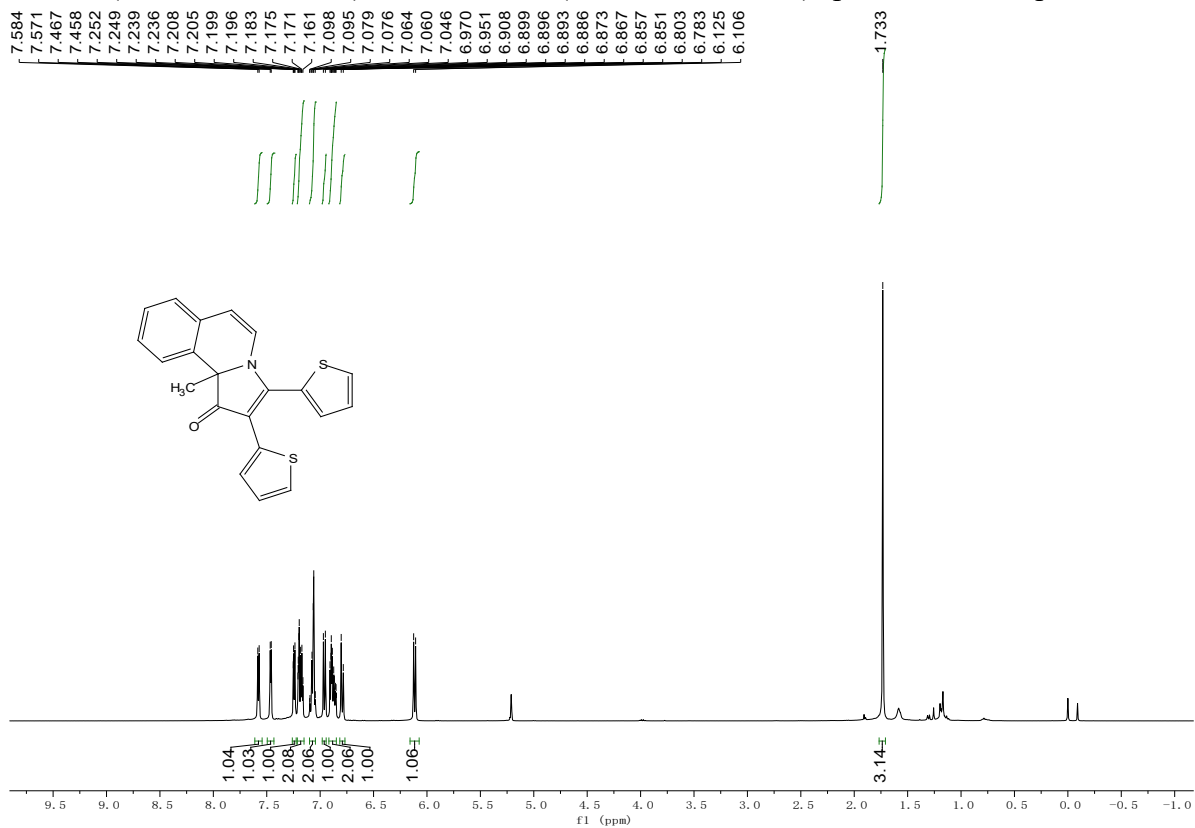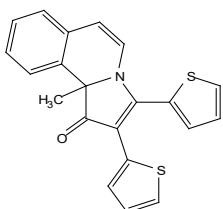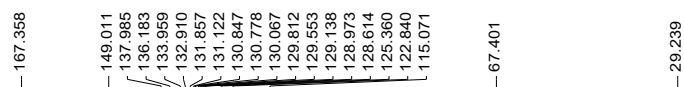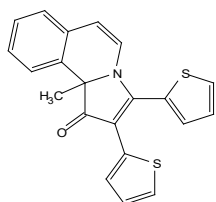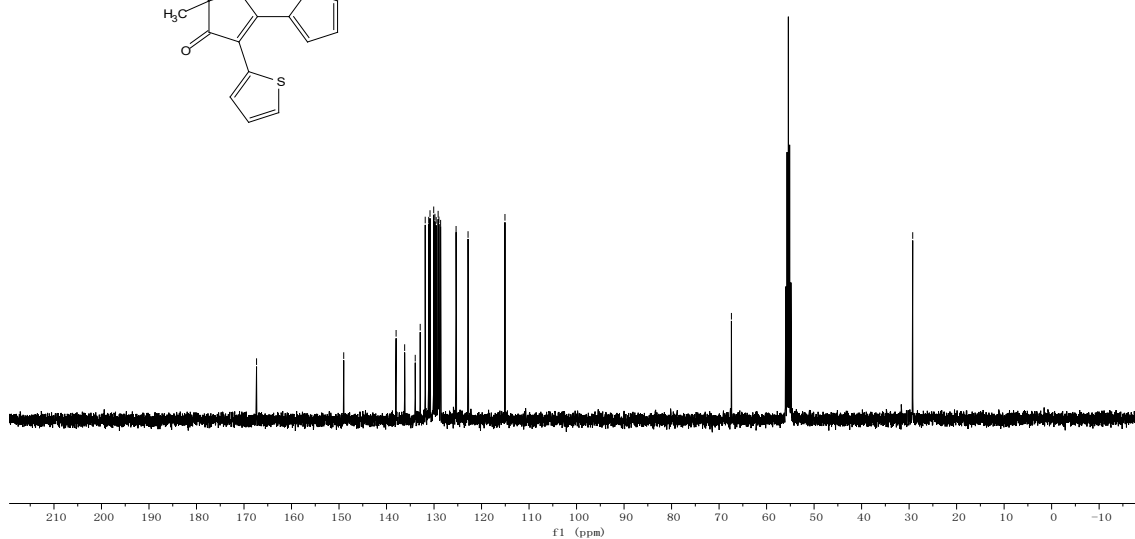

$^1\text{H}$  NMR (400 MHz,  $\text{CD}_2\text{Cl}_2$ ) and  $^{13}\text{C}$  NMR (100 MHz,  $\text{CD}_2\text{Cl}_2$ ) spectrum of compound **6g**

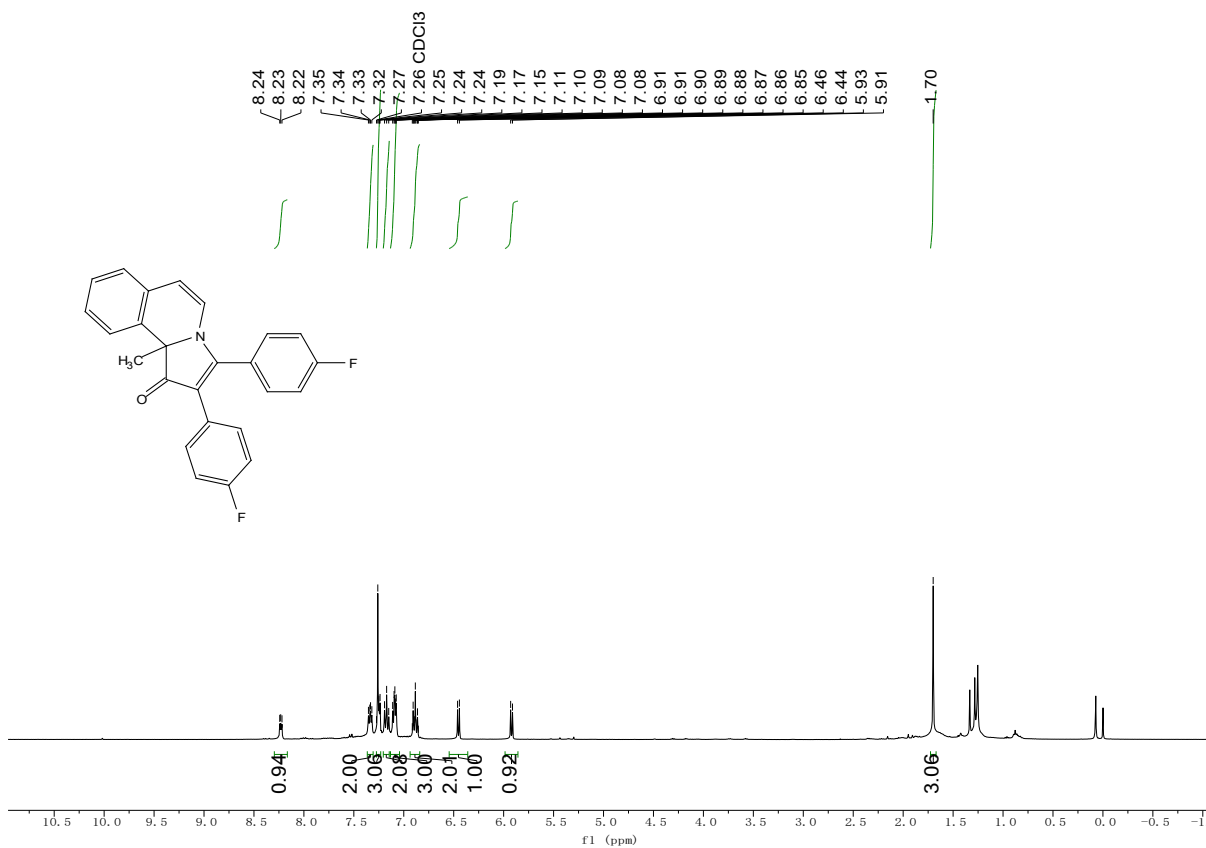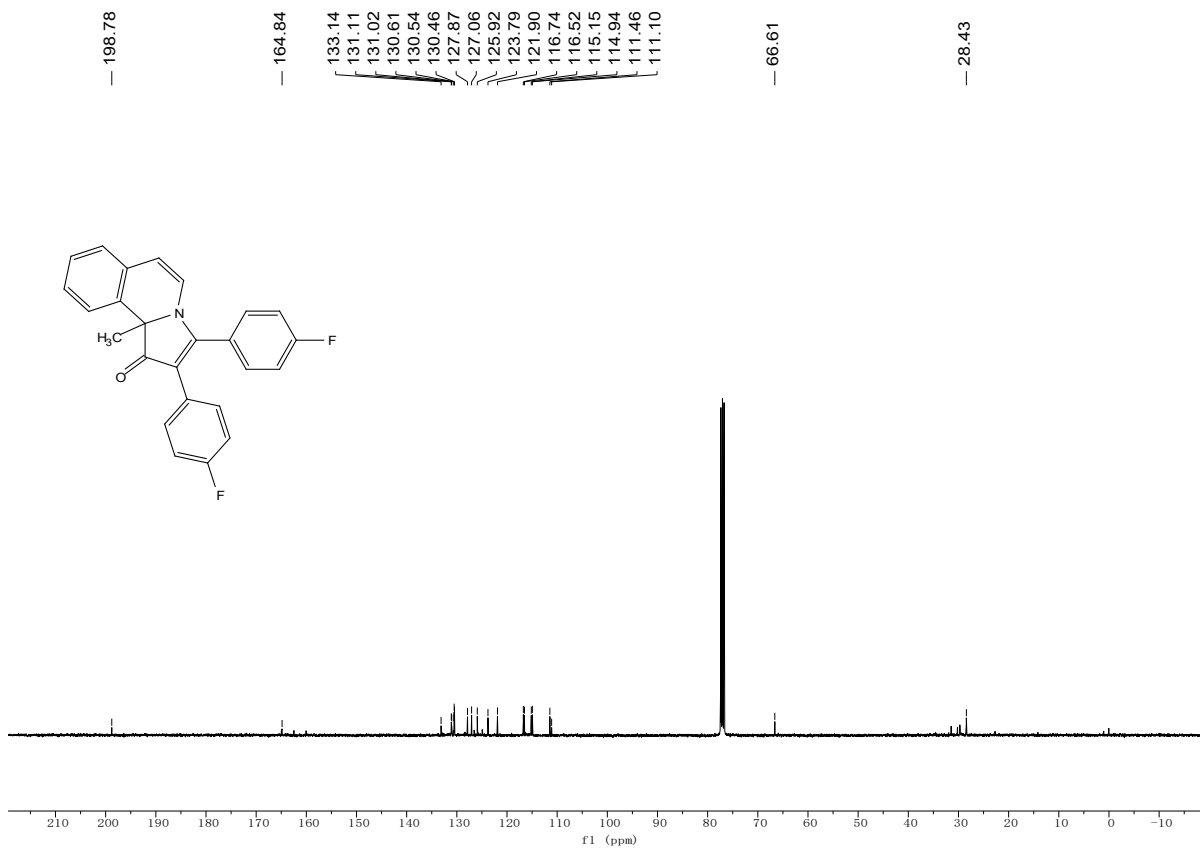

$^1\text{H}$  NMR (400 MHz,  $\text{CD}_2\text{Cl}_2$ ) and  $^{13}\text{C}$  NMR (100 MHz,  $\text{CD}_2\text{Cl}_2$ ) spectrum of compound **6h**

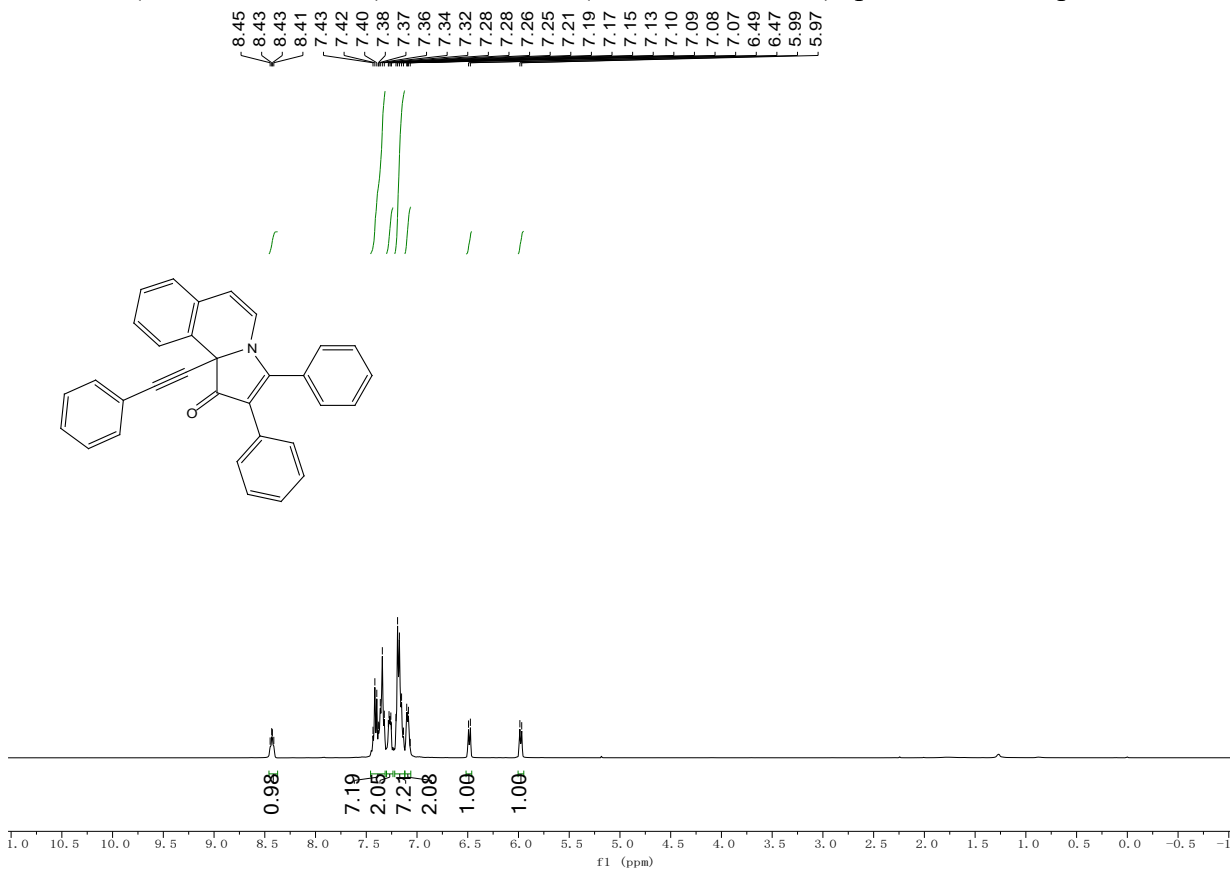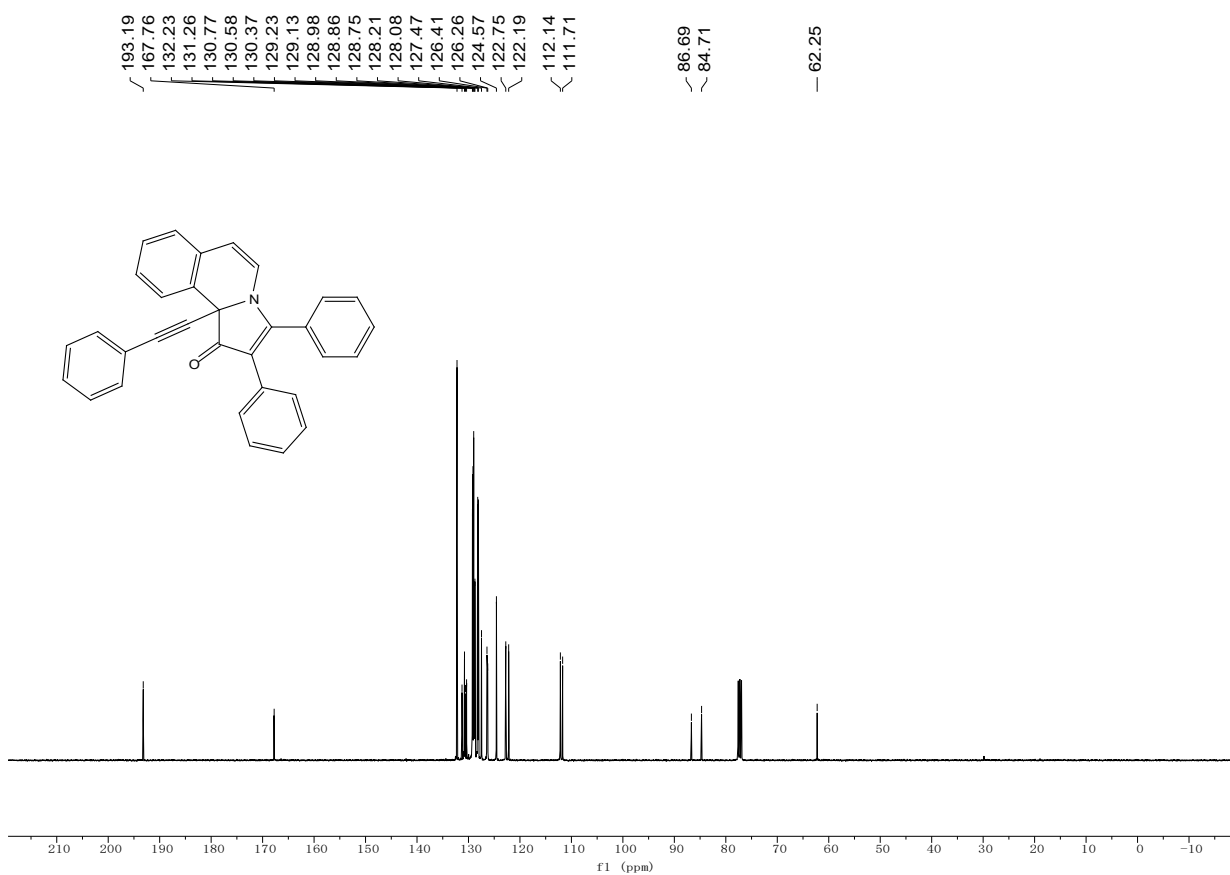



$^1\text{H}$  NMR (400 MHz,  $\text{CD}_2\text{Cl}_2$ ) and  $^{13}\text{C}$  NMR (100 MHz,  $\text{CD}_2\text{Cl}_2$ ) spectrum of compound **6i**

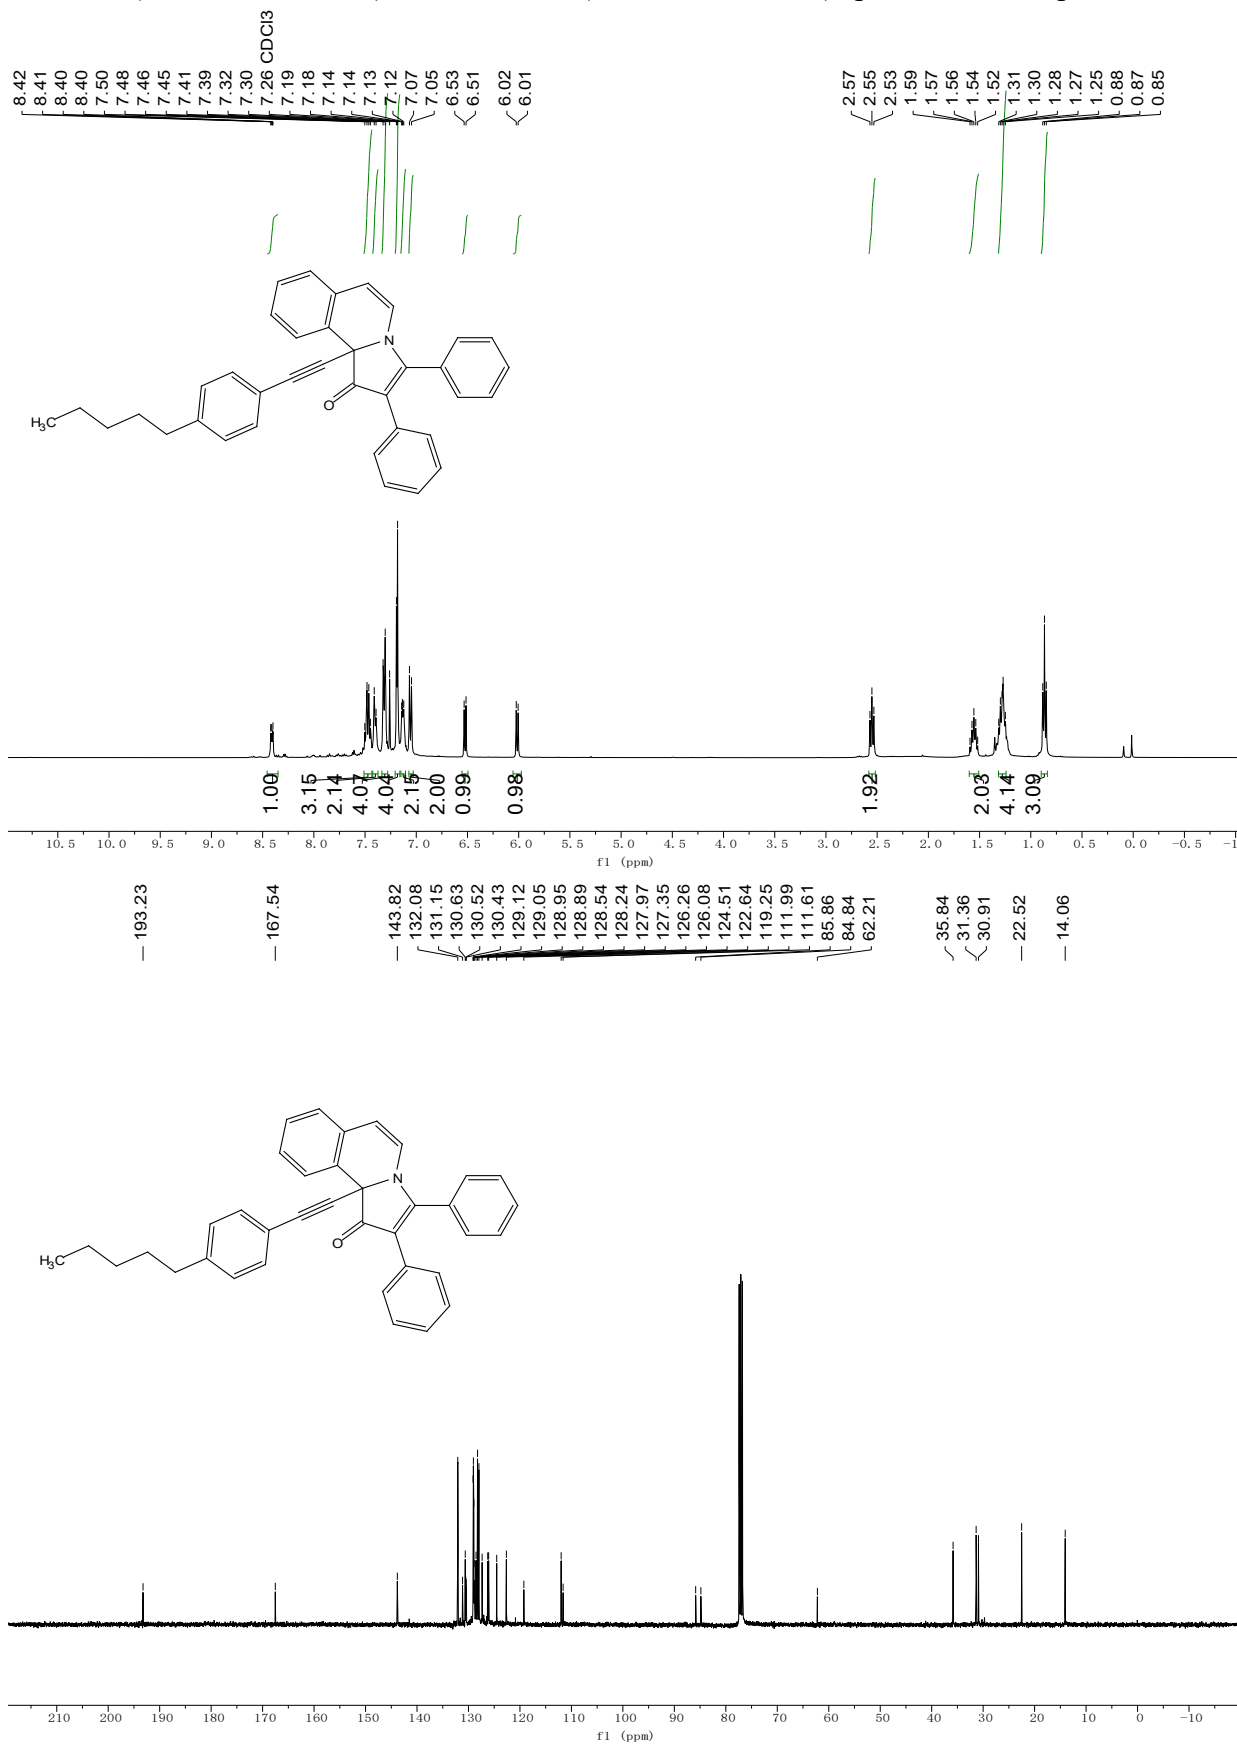

$^1\text{H}$  NMR (400 MHz,  $\text{CD}_2\text{Cl}_2$ ) and  $^{13}\text{C}$  NMR (100 MHz,  $\text{CD}_2\text{Cl}_2$ ) spectrum of compound **6j**

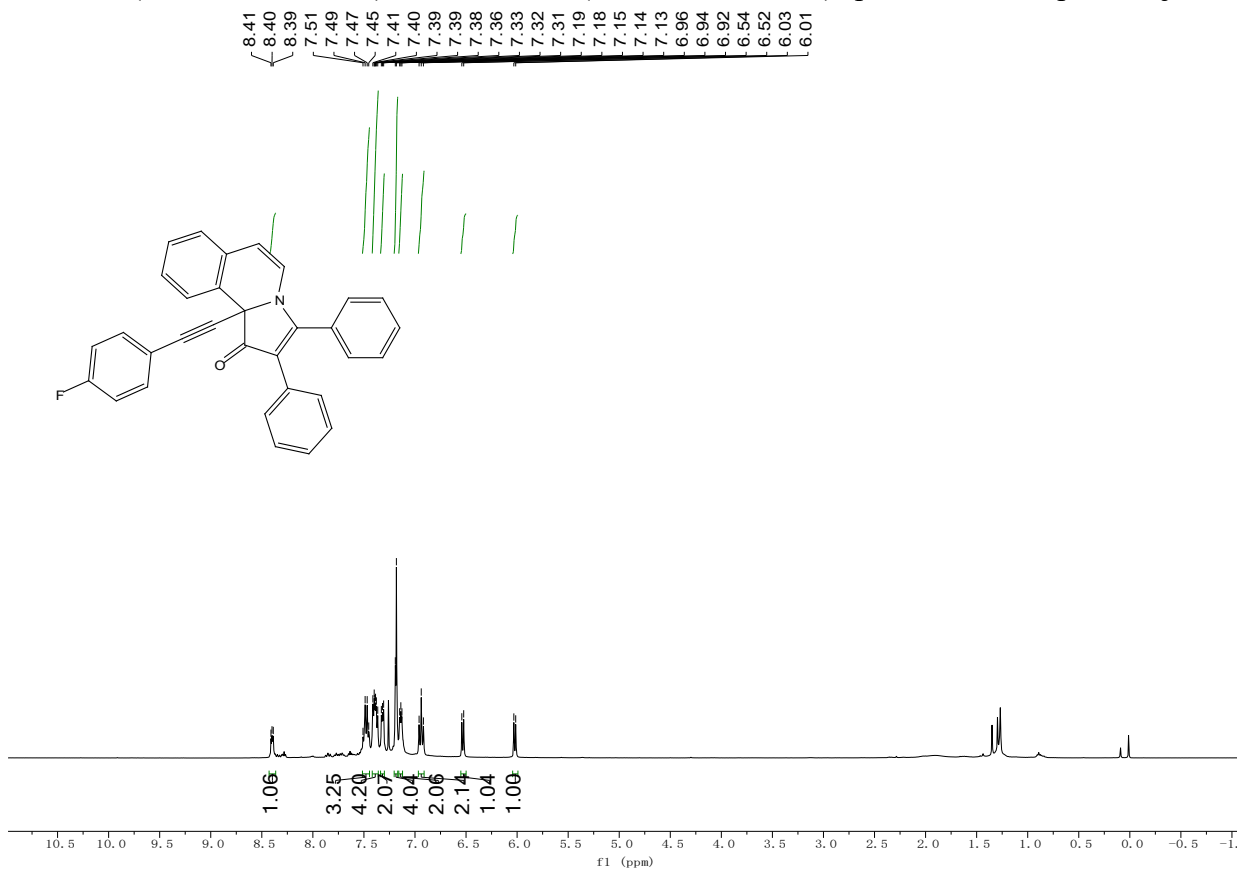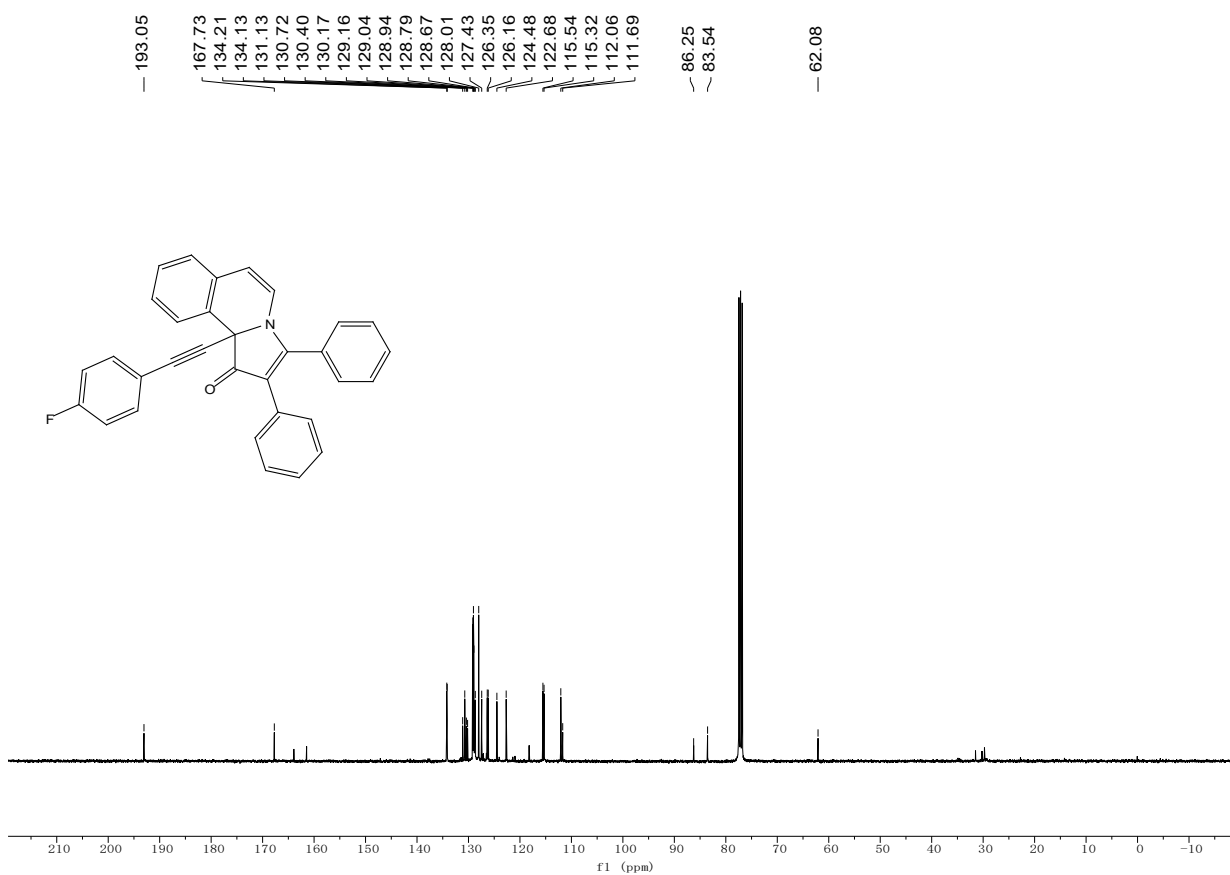

$^1\text{H}$  NMR (400 MHz,  $\text{CDCl}_3$ ) and  $^{13}\text{C}$  NMR (100 MHz,  $\text{CDCl}_3$ ) spectrum of compound **6k**

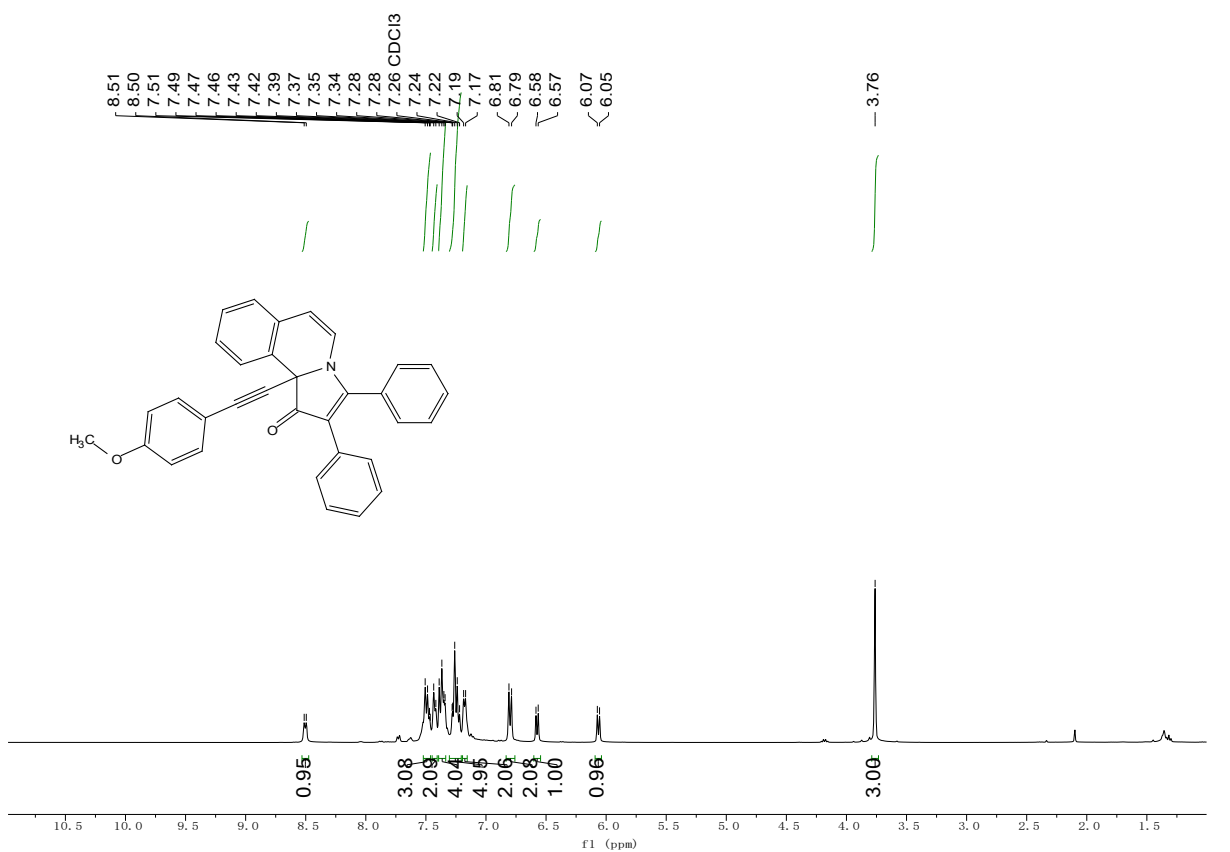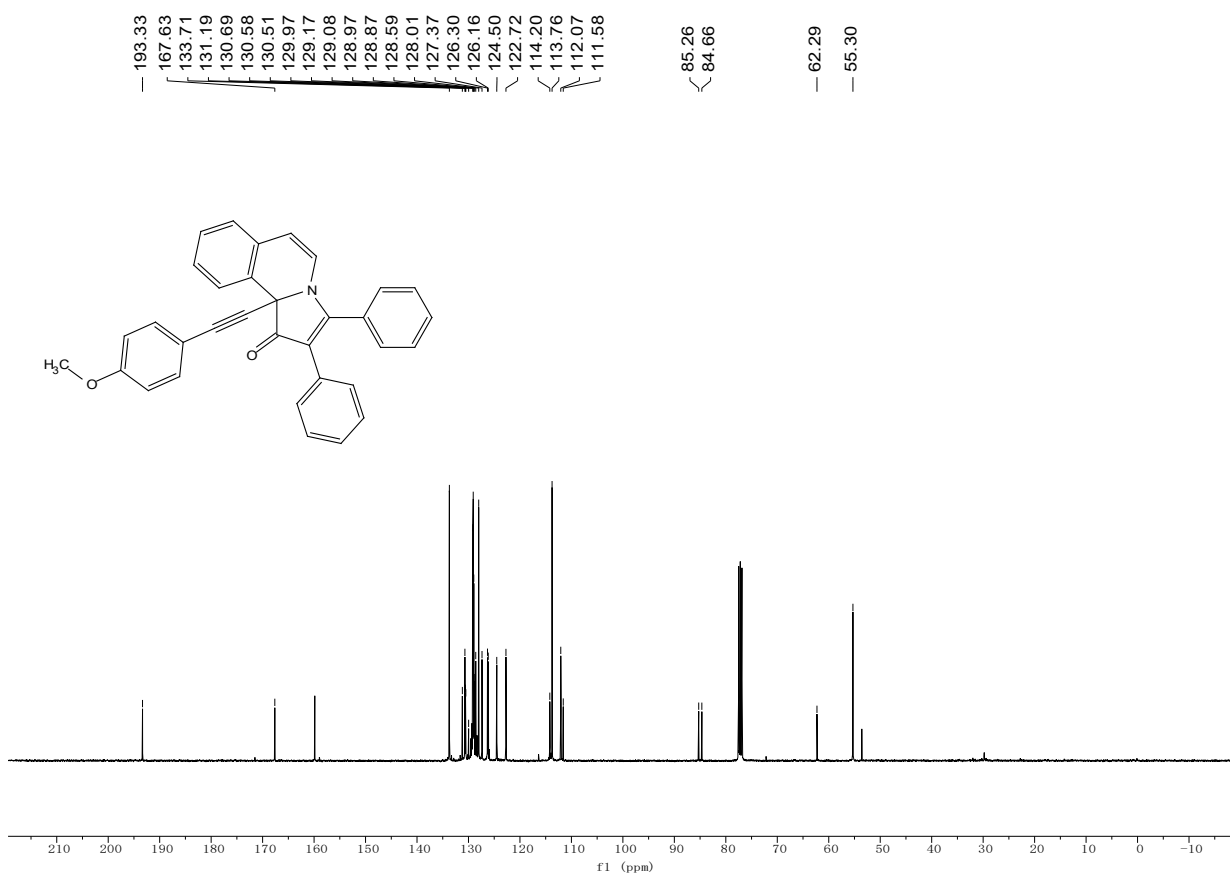

$^1\text{H}$  NMR (400 MHz,  $\text{CDCl}_3$ ) and  $^{13}\text{C}$  NMR (100 MHz,  $\text{CDCl}_3$ ) spectrum of compound **8a**

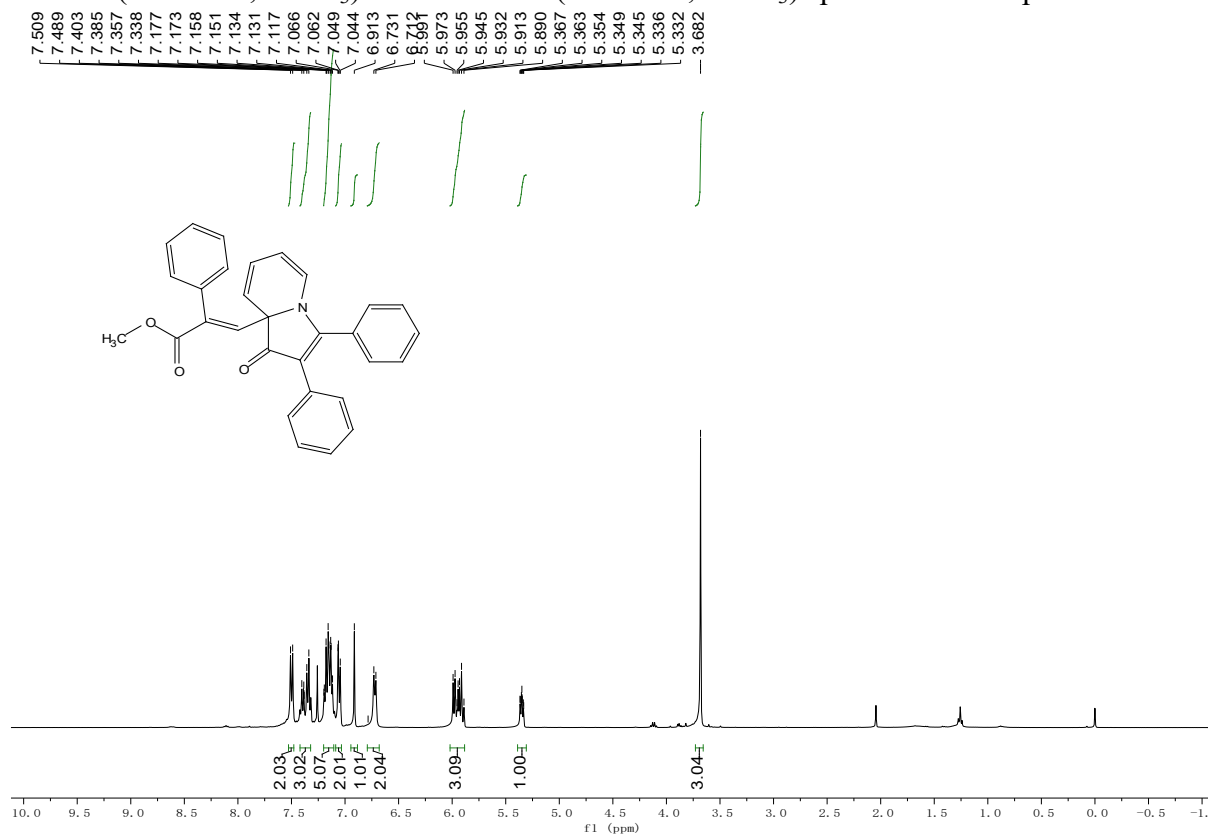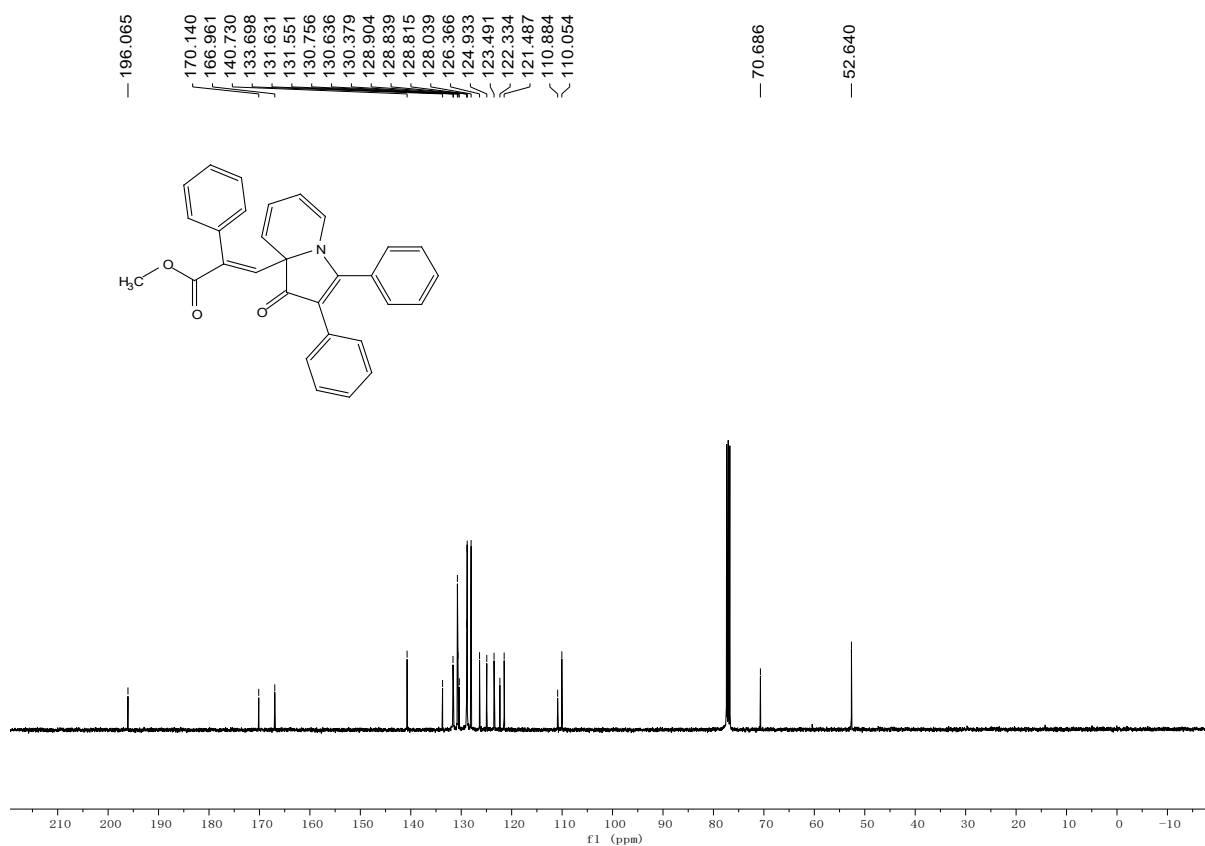

$^1\text{H}$  NMR (400 MHz,  $\text{CDCl}_3$ ) and  $^{13}\text{C}$  NMR (100 MHz,  $\text{CDCl}_3$ ) spectrum of compound **8b**

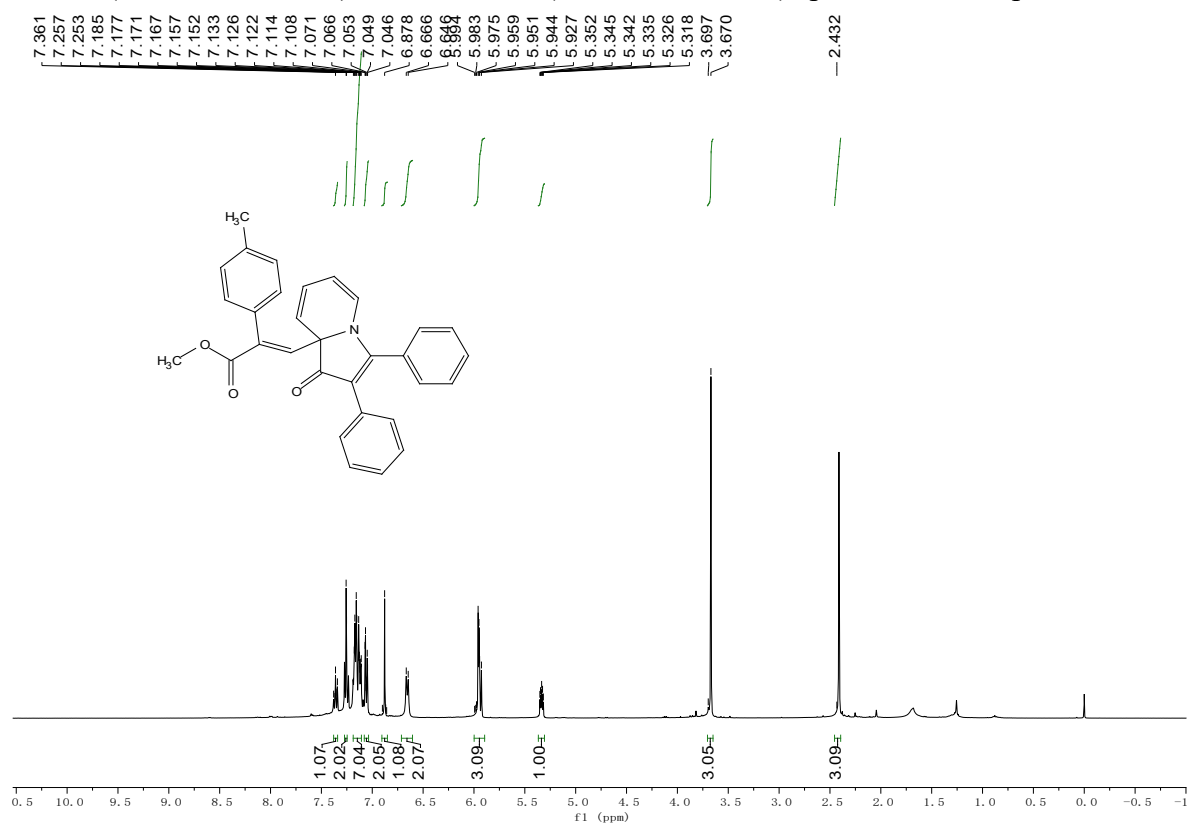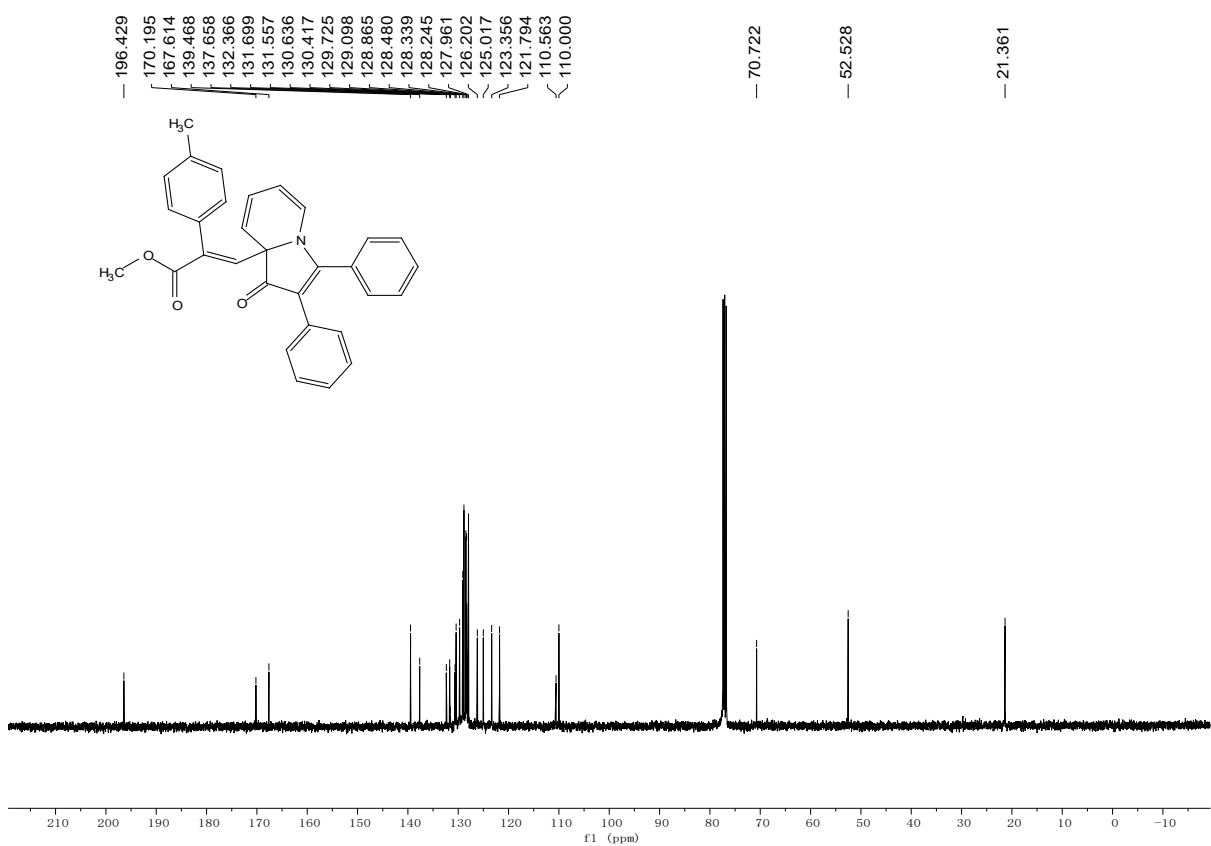

$^1\text{H}$  NMR (400 MHz,  $\text{CDCl}_3$ ) and  $^{13}\text{C}$  NMR (100 MHz,  $\text{CDCl}_3$ ) spectrum of compound **8c**

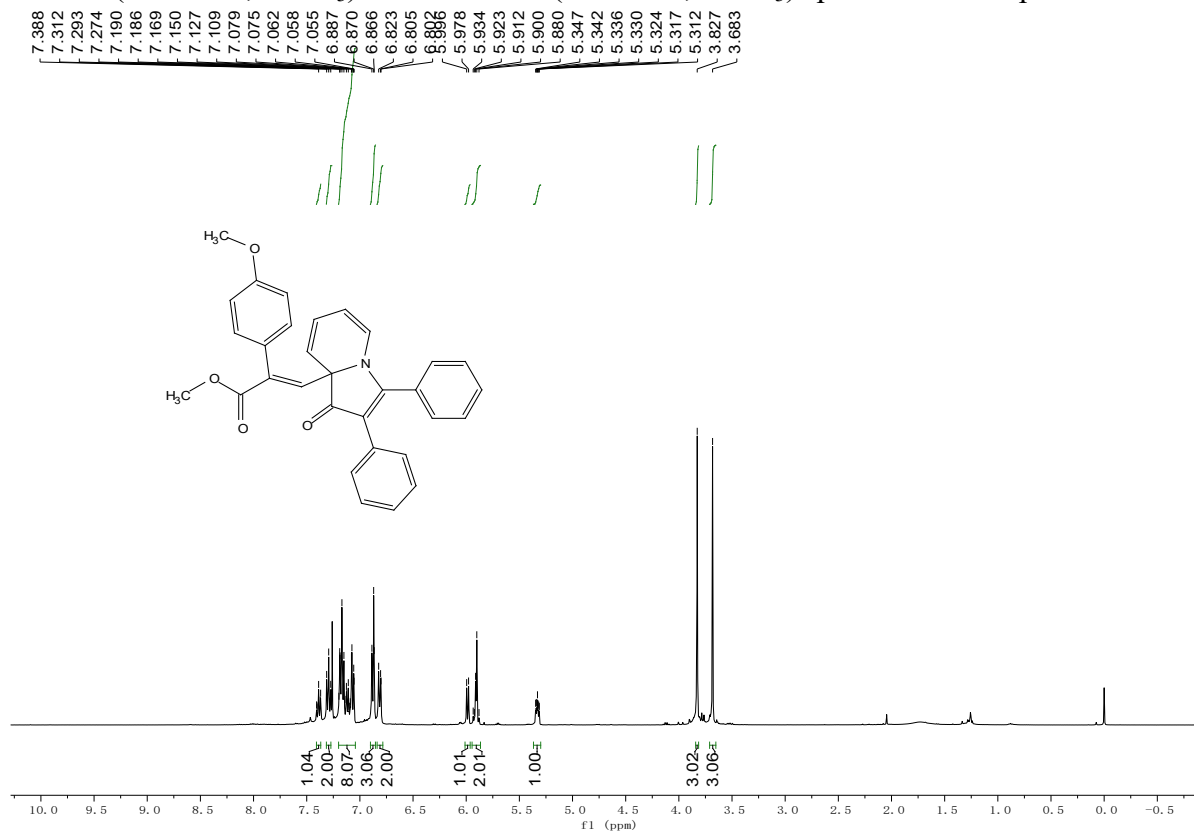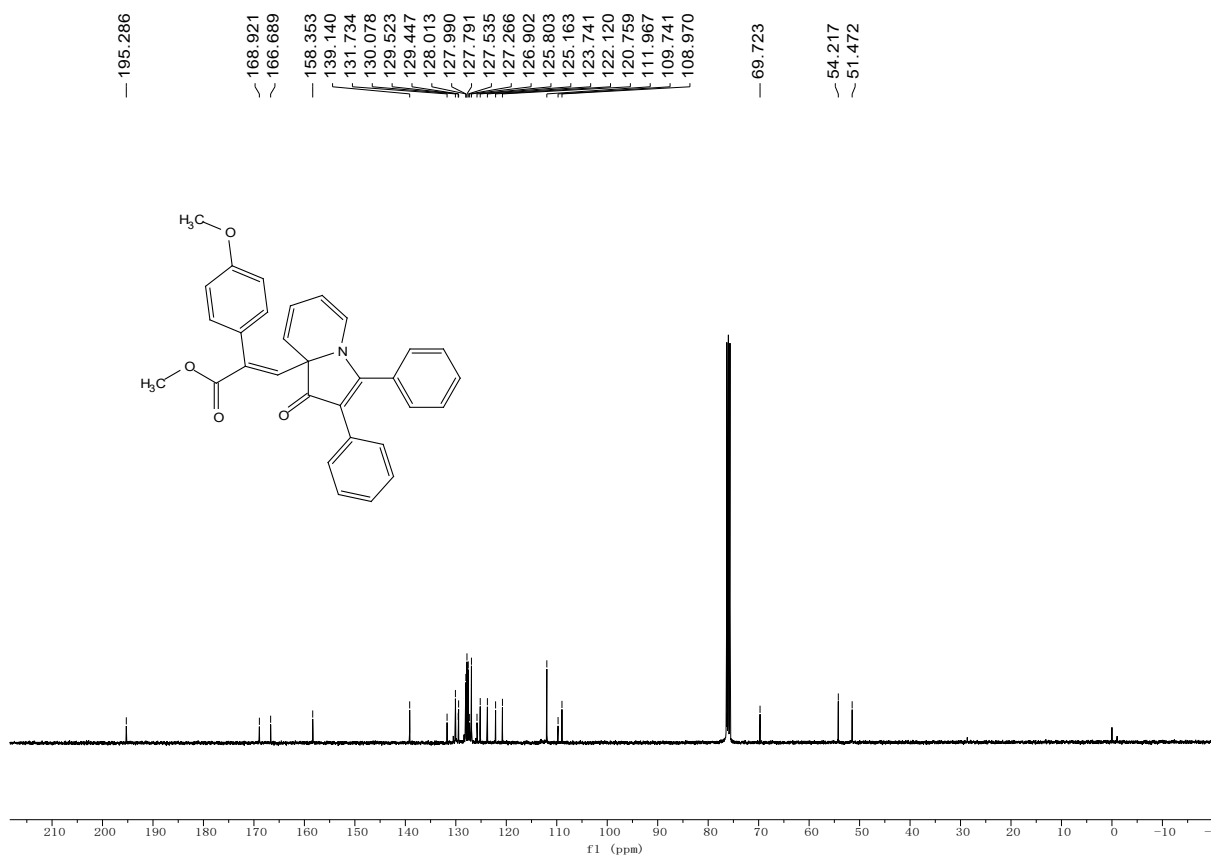

$^1\text{H}$  NMR (400 MHz,  $\text{CDCl}_3$ ) and  $^{13}\text{C}$  NMR (100 MHz,  $\text{CDCl}_3$ ) spectrum of compound **8d**

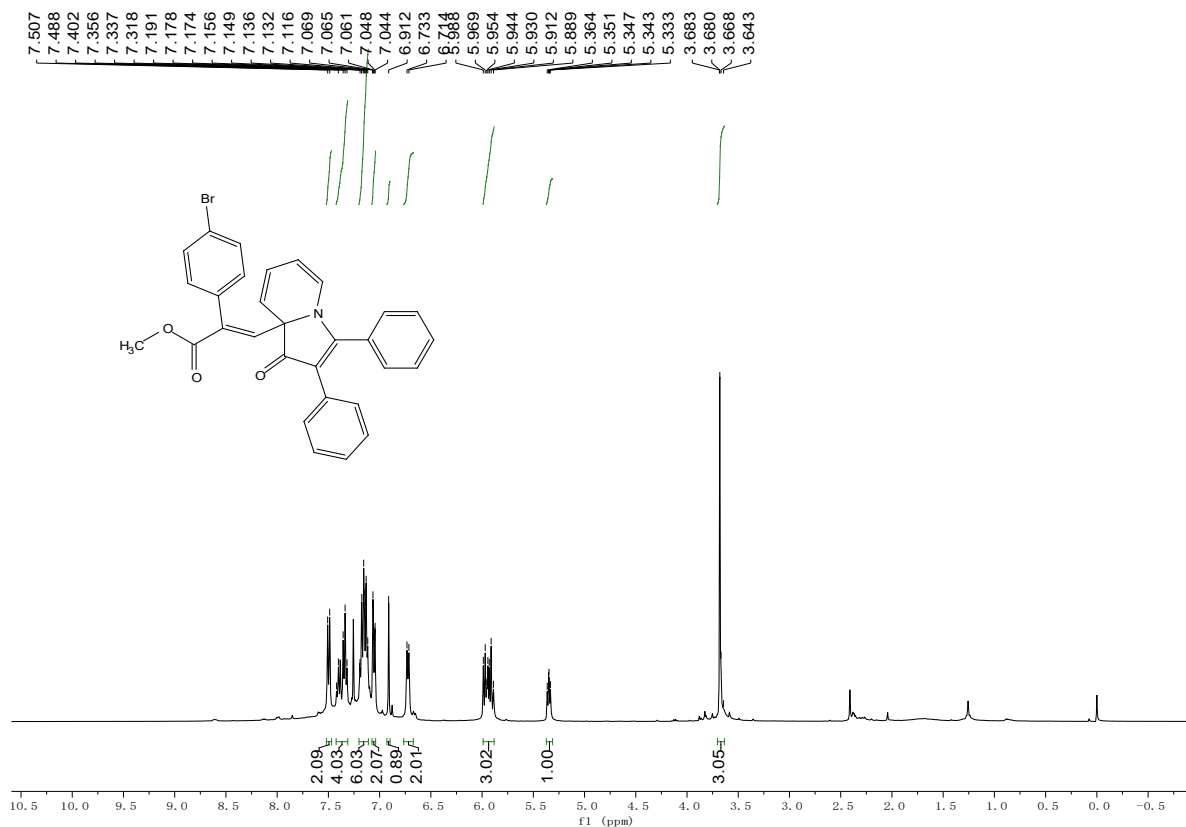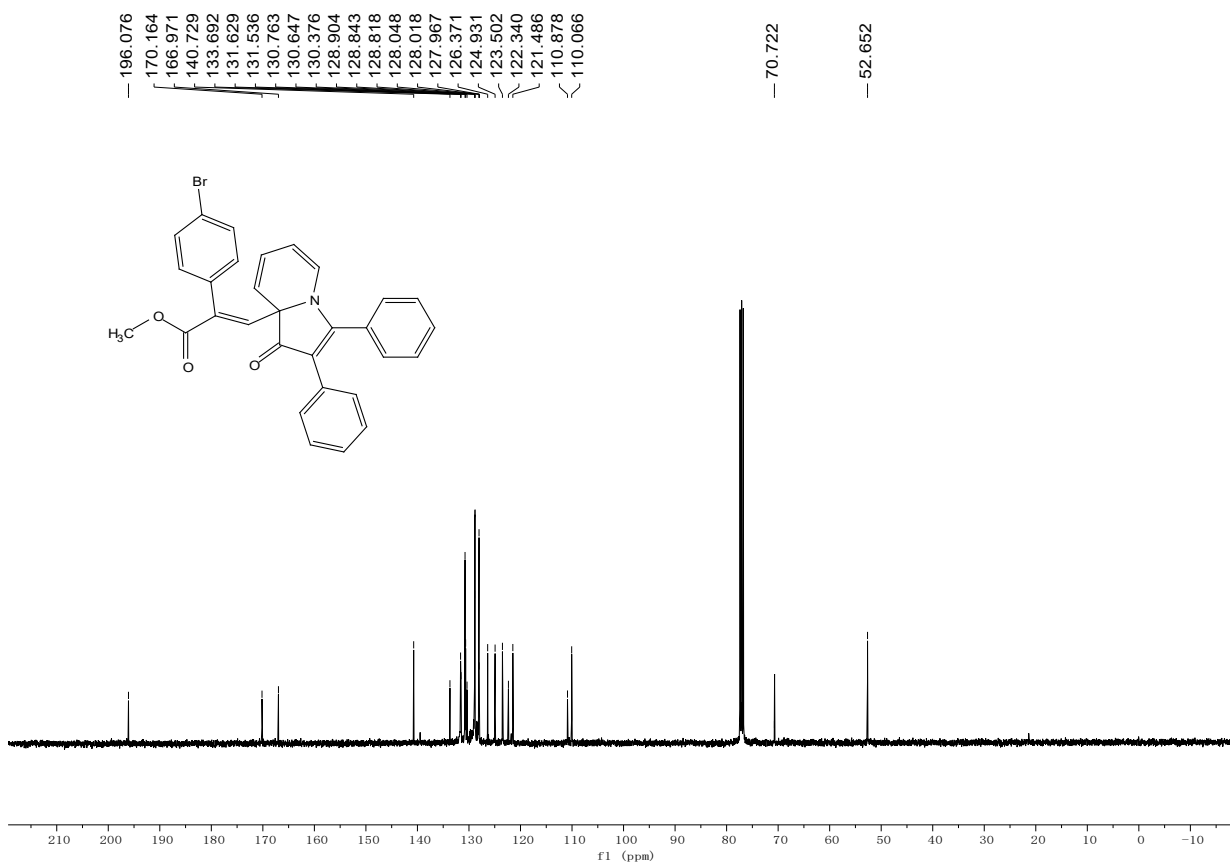

## 4. X-ray crystallographic data

**Figure S2** X-ray single crystal structure of **8d** (displacement ellipsoids are drawn at the 50% probability level)

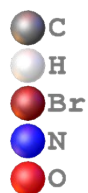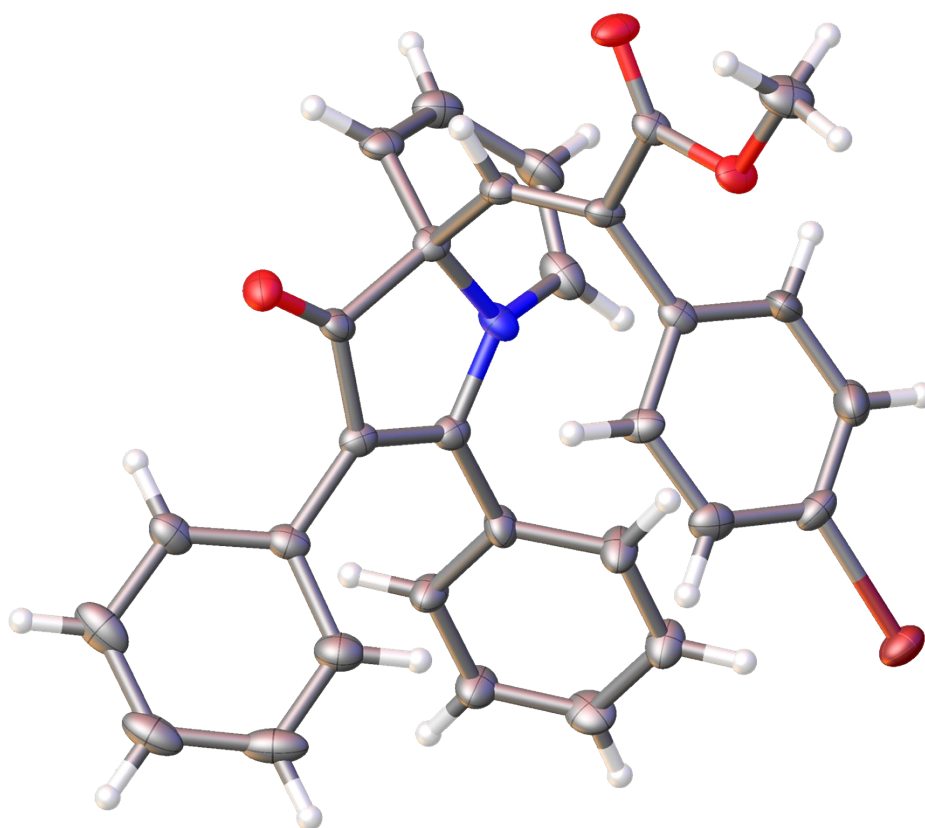

Single crystals of **8d** were grown by slow evaporation of its EA/PE solution. The crystal was kept at 149.99 K during data collection. Supplementary crystallographic data have been deposited at the Cambridge Crystallographic Data Center (CCDC 2227171).

**Table S1** Crystal data and structure refinement for **8d**.

|                     |                                                   |
|---------------------|---------------------------------------------------|
| Identification code | 2-297                                             |
| Empirical formula   | C <sub>30</sub> H <sub>22</sub> BrNO <sub>3</sub> |
| Formula weight      | 524.39                                            |
| Temperature/K       | 149.99(10)                                        |
| Crystal system      | monoclinic                                        |
| Space group         | P2 <sub>1</sub> /c                                |
| a/Å                 | 9.5059(4)                                         |
| b/Å                 | 10.6245(4)                                        |



|                                                |                                                               |
|------------------------------------------------|---------------------------------------------------------------|
| c/Å                                            | 24.3428(16)                                                   |
| $\alpha/^\circ$                                | 90                                                            |
| $\beta/^\circ$                                 | 100.388(5)                                                    |
| $\gamma/^\circ$                                | 90                                                            |
| Volume/Å <sup>3</sup>                          | 2418.2(2)                                                     |
| Z                                              | 4                                                             |
| $\rho_{\text{calc}}/\text{g}/\text{cm}^3$      | 1.440                                                         |
| $\mu/\text{mm}^{-1}$                           | 2.580                                                         |
| F(000)                                         | 1072.0                                                        |
| Crystal size/mm <sup>3</sup>                   | 0.14 × 0.11 × 0.09                                            |
| Radiation                                      | Cu K $\alpha$ ( $\lambda = 1.54184$ )                         |
| 2 $\Theta$ range for data collection/ $^\circ$ | 7.384 to 133.178                                              |
| Index ranges                                   | -10 ≤ h ≤ 11, -8 ≤ k ≤ 12, -28 ≤ l ≤ 28                       |
| Reflections collected                          | 8406                                                          |
| Independent reflections                        | 4271 [R <sub>int</sub> = 0.0495, R <sub>sigma</sub> = 0.0584] |
| Data/restraints/parameters                     | 4271/9/328                                                    |
| Goodness-of-fit on F <sup>2</sup>              | 1.165                                                         |
| Final R indexes [I >= 2 $\sigma$ (I)]          | R <sub>1</sub> = 0.1253, wR <sub>2</sub> = 0.2837             |
| Final R indexes [all data]                     | R <sub>1</sub> = 0.1331, wR <sub>2</sub> = 0.2876             |
| Largest diff. peak/hole / e Å <sup>-3</sup>    | 1.28/-0.89                                                    |

**Table S2** Bond Lengths for **8d**

| Atom | Atom | Length/Å  | Atom | Atom | Length/Å  |
|------|------|-----------|------|------|-----------|
| Br1  | C24  | 1.900(6)  | C9   | C27  | 1.505(8)  |
| Br2  | C24  | 1.946(10) | C10  | C11  | 1.466(8)  |
| O1   | C8   | 1.213(6)  | C11  | C12  | 1.383(8)  |
| O2   | C19  | 1.201(7)  | C11  | C16  | 1.394(8)  |
| O3   | C19  | 1.335(7)  | C12  | C13  | 1.382(8)  |
| O3   | C20  | 1.449(7)  | C13  | C14  | 1.414(9)  |
| N1   | C9   | 1.468(6)  | C14  | C15  | 1.342(9)  |
| N1   | C10  | 1.388(7)  | C15  | C16  | 1.396(8)  |
| N1   | C30  | 1.394(7)  | C17  | C18  | 1.345(8)  |
| C1   | C2   | 1.367(8)  | C18  | C19  | 1.520(7)  |
| C1   | C6   | 1.414(9)  | C18  | C21  | 1.482(7)  |
| C1   | C7   | 1.458(8)  | C21  | C22  | 1.371(7)  |
| C2   | C3   | 1.406(9)  | C21  | C26  | 1.408(8)  |
| C3   | C4   | 1.355(11) | C22  | C23  | 1.378(9)  |
| C4   | C5   | 1.417(10) | C23  | C24  | 1.362(9)  |
| C5   | C6   | 1.362(9)  | C24  | C25  | 1.376(8)  |
| C7   | C8   | 1.444(8)  | C25  | C26  | 1.388(8)  |
| C7   | C10  | 1.387(7)  | C27  | C28  | 1.337(8)  |
| C8   | C9   | 1.548(7)  | C28  | C29  | 1.453(9)  |
| C9   | C17  | 1.517(7)  | C29  | C30  | 1.317(10) |

**Table S3** Bond Angles for **8d**

| Atom | Atom | Atom | Angle/ $^\circ$ | Atom | Atom | Atom | Angle/ $^\circ$ |
|------|------|------|-----------------|------|------|------|-----------------|
| C19  | O3   | C20  | 114.3(5)        | C16  | C11  | C10  | 119.8(5)        |
| C10  | N1   | C9   | 110.3(4)        | C13  | C12  | C11  | 121.7(6)        |
| C10  | N1   | C30  | 125.1(5)        | C12  | C13  | C14  | 118.1(6)        |
| C30  | N1   | C9   | 119.3(5)        | C15  | C14  | C13  | 120.2(6)        |
| C2   | C1   | C6   | 116.9(5)        | C14  | C15  | C16  | 121.9(6)        |
| C2   | C1   | C7   | 121.1(5)        | C11  | C16  | C15  | 118.7(5)        |

|     |     |     |          |     |     |     |          |
|-----|-----|-----|----------|-----|-----|-----|----------|
| C6  | C1  | C7  | 121.9(5) | C18 | C17 | C9  | 130.7(5) |
| C1  | C2  | C3  | 122.6(6) | C17 | C18 | C19 | 115.6(5) |
| C4  | C3  | C2  | 119.1(6) | C17 | C18 | C21 | 127.5(5) |
| C3  | C4  | C5  | 120.2(6) | C21 | C18 | C19 | 116.9(4) |
| C6  | C5  | C4  | 119.4(7) | O2  | C19 | O3  | 124.8(5) |
| C5  | C6  | C1  | 121.8(6) | O2  | C19 | C18 | 124.0(5) |
| C8  | C7  | C1  | 124.5(4) | O3  | C19 | C18 | 111.2(5) |
| C10 | C7  | C1  | 127.7(5) | C22 | C21 | C18 | 122.1(5) |
| C10 | C7  | C8  | 107.8(5) | C22 | C21 | C26 | 118.5(5) |
| O1  | C8  | C7  | 130.6(5) | C26 | C21 | C18 | 119.2(4) |
| O1  | C8  | C9  | 121.8(5) | C21 | C22 | C23 | 120.9(5) |
| C7  | C8  | C9  | 107.7(4) | C24 | C23 | C22 | 120.7(5) |
| N1  | C9  | C8  | 102.2(4) | C23 | C24 | Br1 | 121.4(4) |
| N1  | C9  | C17 | 115.6(4) | C23 | C24 | Br2 | 103.9(5) |
| N1  | C9  | C27 | 111.0(4) | C23 | C24 | C25 | 119.9(6) |
| C17 | C9  | C8  | 110.2(4) | C25 | C24 | Br1 | 118.4(5) |
| C27 | C9  | C8  | 112.3(4) | C25 | C24 | Br2 | 136.2(6) |
| C27 | C9  | C17 | 105.7(5) | C24 | C25 | C26 | 120.1(6) |
| N1  | C10 | C11 | 120.9(4) | C25 | C26 | C21 | 119.8(5) |
| C7  | C10 | N1  | 111.9(5) | C28 | C27 | C9  | 118.2(5) |
| C7  | C10 | C11 | 127.2(5) | C27 | C28 | C29 | 121.4(6) |
| C12 | C11 | C10 | 121.1(5) | C30 | C29 | C28 | 119.5(6) |
| C12 | C11 | C16 | 119.1(5) | C29 | C30 | N1  | 120.4(6) |

## 5. References

1. a) C. M. Vanos, T. H. Lambert, *Angew. Chem. Int. Ed.*, 2011, **50**, 12222-12226. b) A. P. Patricia, J. D. Tovar, *J. Org. Chem.*, 2010, **75**, 5689-5696.

2. S. Prateptongkum, K. Driller, R. Jackstell, A. Spannenberg, M. Beller, Efficient Synthesis of Biologically Interesting 3,4-Diaryl-Substituted Succinimides and Maleimides: Application of Iron-Catalyzed Carbonylations., *Chem. Eur. J.*, 2010, **16**, 9606-9615.
3. J. Tian, Z. Zhang, X. Yang, H. Fun, J. Xu, *J. Org. Chem.*, 2001, **66**, 8230-8235.
4. Frisch, M. J.; Trucks, G. W.; Schlegel, H. B.; Scuseria, G. E.; Robb, M. A.; Cheeseman, J. R.; Montgomery, J. A.; Vreven, T.; Kudin, K. N.; Burant, J. C.; Millam, J. M.; Iyengar, S. S.; Tomasi, J.; Barone, V.; Mennucci, B.; Cossi, M.; Scalmani, G.; Rega, N.; Petersson, G. A.; Nakatsuji, H.; Hada, M.; Ehara, M.; Toyota, K.; Fukuda, R.; Hasegawa, J.; Ishida, M.; Nakajima, T.; Honda, Y.; Kitao, O.; Nakai, O.; Klene, M.; Li, X.; Knox, J. E.; Hratchian, H. P.; Cross, J. B.; Bakken, V.; Adamo, C.; Jaramillo, J.; Gomperts, R.; Stratmann, R. E.; Yazyev, O.; Austin, A. J.; Cammi, R.; Pomelli, C.; Ochterski, J. W.; Ayala, P. Y.; Morokuma, K.; Voth, G. A.; Salvador, P.; Dannenberg, J. J.; Zakrzewski, V. G.; Dapprich, S.; Daniels, A. D.; Strain, M. C.; Farkas, O.; Malick, D. K.; Rabuck, A. D.; Raghavachari, K.; Foresman, J. B.; Ortiz, J. V.; Cui, Q.; Baboul, A. G.; Clifford, S.; Cioslowski, J.; Stefanov, B. B.; Liu, G.; Liashenko, A.; Piskorz, P.; Komaromi, I.; Martin, R. L.; Fox, D. J.; Keith, T.; Al-Laham, M. A.; Peng, C. Y.; Nanayakkara, A.; Challacombe, M.; Gill, P. M. W.; Johnson, B.; Chen, W.; Wong, M. W.; Gonzalez, C.; Pople, J. A. Gaussian 03, Revision E.01; Gaussian, Inc.: Pittsburgh PA, 2004.
5. A. V. Marenich, C. J. Cramer and D. G. Truhlar, *J. Phys. Chem., B* 2009, **113**, 6378-6396.
